# Supplementary material
Source: PubMed Central journal article supplement (PMC4238941)
Supplement: NIHMS642518-supplement-SI.pdf [file NIHMS642518-supplement-SI.pdf]

# Supplemental Material

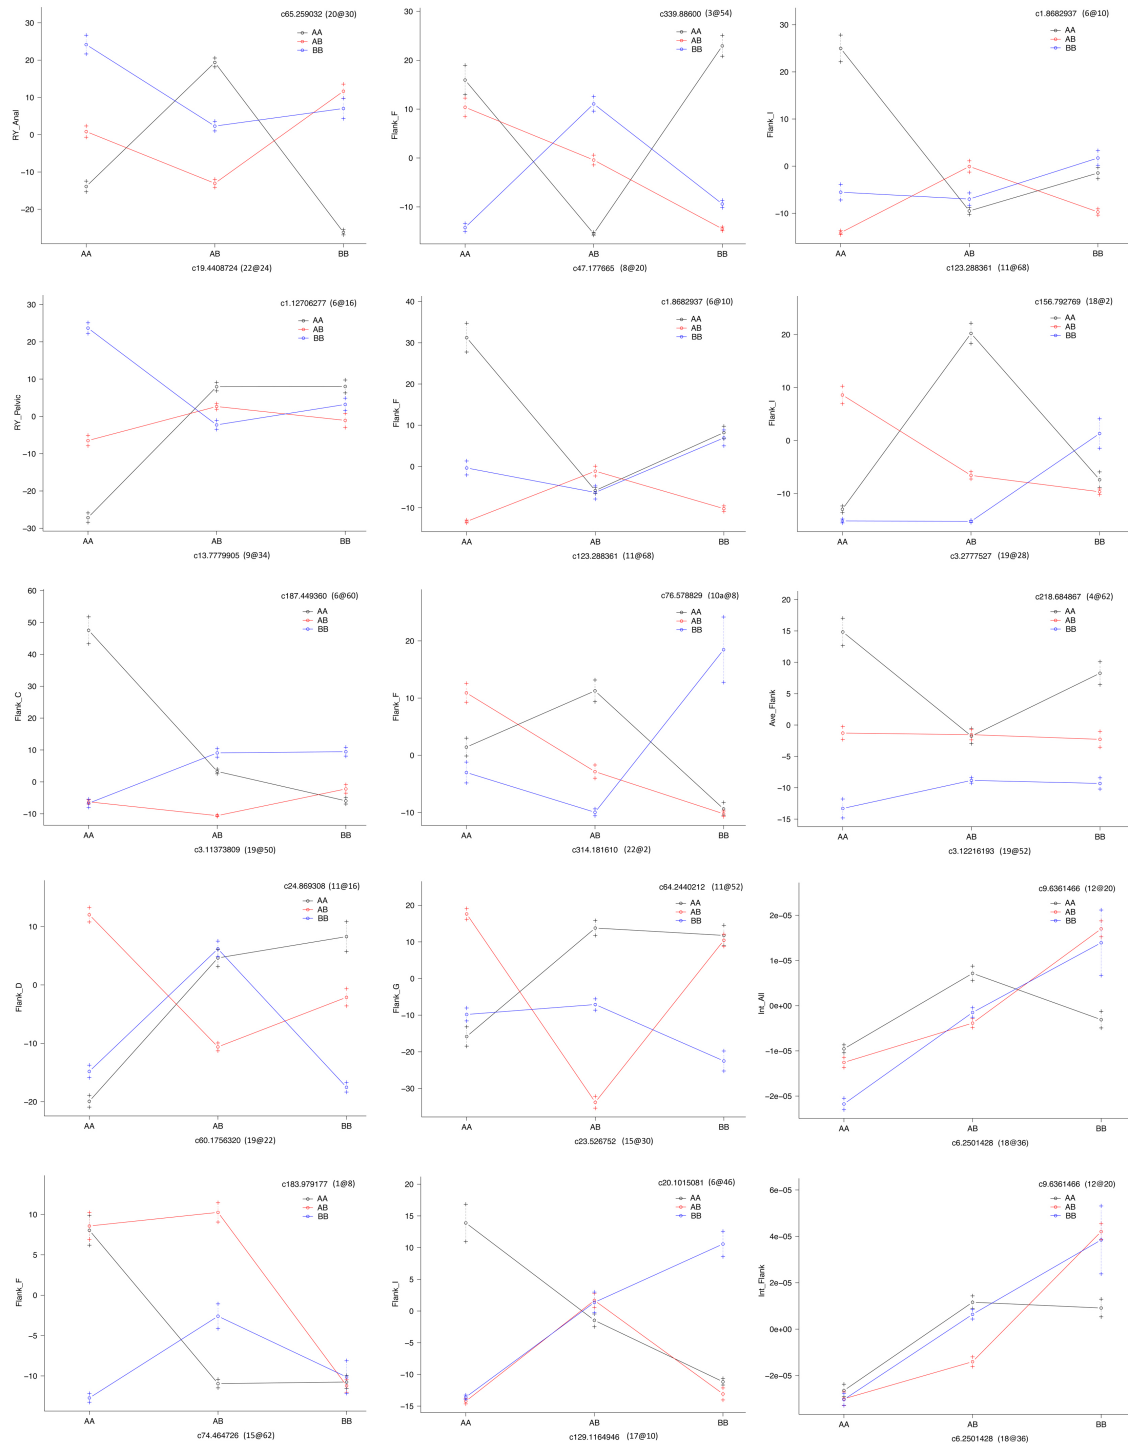

**Figure S1.** Effect plots from all significant (i.e., 0.05 genome-wide level) two-way interactions are shown. Trait values are recorded on the y-axis and genotypes are

on the x-axis. In all instances, the AA genotype refers to LF/LF, whereas the BB genotype is TRC/TRC. The AB genotype is LF/TRC. Marker names refer to both the genome scaffold, and nucleotide position of the marker (from the MZv.0 assembly). For example, c13.7779905 refers to a SNP on scaffold 13 at 7,779,905Mbs. In addition the linkage group and map position is shown with each marker (e.g., 9@34 = LG9, 34cM).

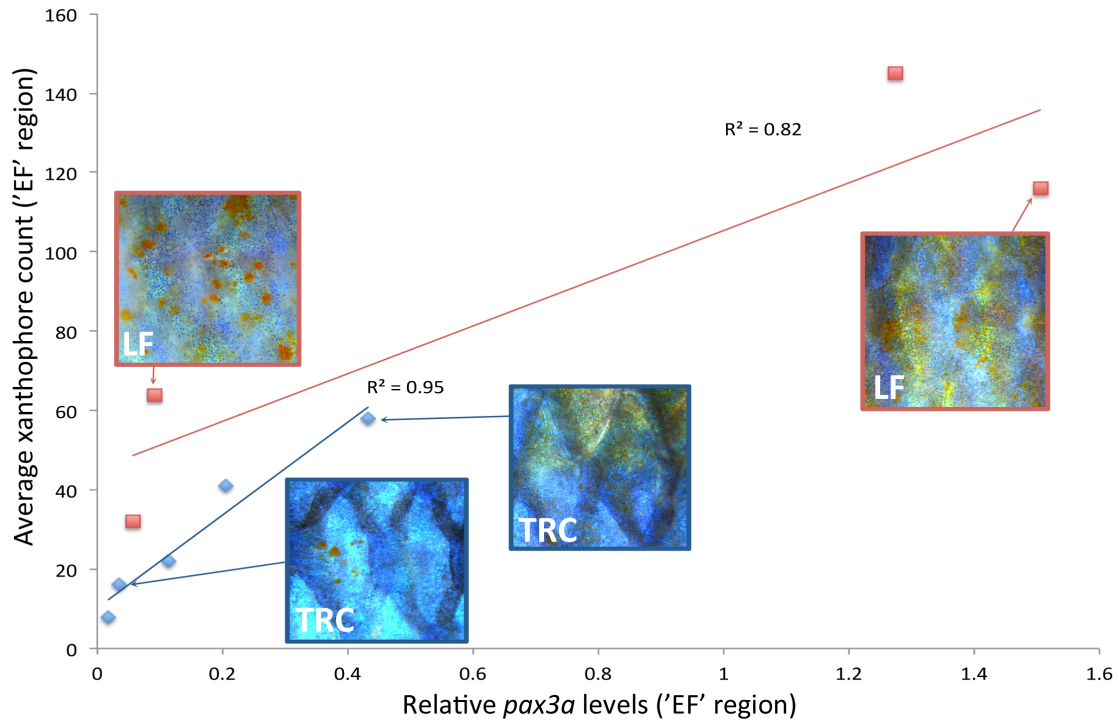

**Figure S2.** A positive association is noted between relative *pax3a* transcript levels and xanthophore count in both LF and TRC. Xanthophore number was counted under a stereomicroscope, and averaged from 5 scales within the 'E-F' flank region for several lab-reared LF and TRC males. Variation in xanthophore number was observed for both species, and was extensive for LF. In both species, average xanthophore count was associated with relative *pax3a* transcript levels, measured by quantitative PCR.

Table S1. Various measures of genetic differentiation across SNPs derived from genotyping twenty wild caught LF and twenty wild caught TRC. All markers listed below have  $F_{st}$  values equal to or greater than 0.58.

| Marker (scaffold.bp) | $F_{st}$ | $F_{stp}$ | $F_{is}$ | $D_{est}$ |
|----------------------|----------|-----------|----------|-----------|
| mkr0.11488535        | 1        | 1         | NaN      | 1         |
| mkr0.12844052        | 1        | 1         | NaN      | 1         |
| mkr0.1325166         | 1        | 1         | NaN      | 1         |
| mkr0.1325183         | 1        | 1         | NaN      | 1         |
| mkr0.13419971        | 0.8503   | 0.9191    | -0.0595  | 0.9147    |
| mkr0.14258868        | 0.9474   | 0.973     | -0.0007  | 0.973     |
| mkr0.14258907        | 0.9474   | 0.973     | -0.0007  | 0.973     |
| mkr0.14345619        | 1        | 1         | NaN      | 1         |
| mkr0.14967006        | 0.892    | 0.9429    | 0        | 0.9444    |
| mkr0.14971946        | 0.9445   | 0.9715    | -0.0015  | 0.9714    |
| mkr0.15218636        | 0.8976   | 0.946     | -0.0293  | 0.9445    |
| mkr0.15862604        | 1        | 1         | NaN      | 1         |
| mkr0.16064563        | 0.8859   | 0.9395    | -0.0331  | 0.9376    |
| mkr0.16149180        | 1        | 1         | NaN      | 1         |
| mkr0.16222976        | 0.9474   | 0.973     | -0.0007  | 0.973     |
| mkr0.16556270        | 1        | 1         | NaN      | 1         |
| mkr0.17182901        | 1        | 1         | NaN      | 1         |
| mkr0.17457805        | 0.8573   | 0.9232    | -0.0556  | 0.9193    |
| mkr0.17575903        | 0.9236   | 0.9603    | -0.0065  | 0.96      |
| mkr0.18158657        | 1        | 1         | NaN      | 1         |
| mkr0.18725296        | 1        | 1         | NaN      | 1         |
| mkr0.1988457         | NaN      | NaN       | NaN      | NaN       |
| mkr0.2582514         | 0.9472   | 0.9729    | 0.0026   | 0.973     |
| mkr0.2639114         | 1        | 1         | NaN      | 1         |
| mkr0.3426417         | 1        | 1         | NaN      | 1         |
| mkr0.358525          | 0.8573   | 0.9232    | -0.0556  | 0.9193    |
| mkr0.3785116         | 1        | 1         | NaN      | 1         |
| mkr0.5071706         | 0.95     | 0.9744    | 0        | 0.9744    |
| mkr0.6157670         | 0.9025   | 0.9488    | -0.027   | 0.9474    |
| mkr0.6854671         | 0.8473   | 0.9174    | 0.6543   | 0.9145    |
| mkr0.6854782         | 1        | 1         | NaN      | 1         |
| mkr0.7061265         | 1        | 1         | NaN      | 1         |
| mkr0.8829323         | 1        | 1         | NaN      | 1         |
| mkr0.8989175         | 0.9474   | 0.973     | 0        | 0.973     |
| mkr1.12449379        | 1        | 1         | NaN      | 1         |
| mkr1.12617600        | 0.95     | 0.9743    | 0.0007   | 0.9744    |
| mkr1.13260711        | 1        | 1         | NaN      | 1         |
| mkr1.13554615        | 1        | 1         | NaN      | 1         |

|               |        |        |         |        |
|---------------|--------|--------|---------|--------|
| mkr1.13592357 | 1      | 1      | NaN     | 1      |
| mkr1.13639607 | 0.8573 | 0.9232 | -0.0556 | 0.9193 |
| mkr1.1395687  | 1      | 1      | NaN     | 1      |
| mkr1.14802276 | 1      | 1      | NaN     | 1      |
| mkr1.15055852 | 0.7953 | 0.886  | -0.0425 | 0.886  |
| mkr1.1573715  | 0.95   | 0.9744 | 0       | 0.9744 |
| mkr1.229937   | 0.95   | 0.9744 | 0       | 0.9744 |
| mkr1.2711087  | 0.95   | 0.9744 | 0       | 0.9744 |
| mkr1.3052167  | 1      | 1      | NaN     | 1      |
| mkr1.3066840  | 0.95   | 0.9744 | 0       | 0.9744 |
| mkr1.3067114  | 0.9377 | 0.9678 | -0.0033 | 0.9677 |
| mkr1.3208255  | 0.95   | 0.9744 | 0       | 0.9744 |
| mkr1.337776   | 1      | 1      | NaN     | 1      |
| mkr1.337781   | 1      | 1      | NaN     | 1      |
| mkr1.3415840  | 1      | 1      | NaN     | 1      |
| mkr1.3674355  | 0.9445 | 0.9715 | -0.0008 | 0.9714 |
| mkr1.3674373  | 1      | 1      | NaN     | 1      |
| mkr1.373004   | 1      | 1      | NaN     | 1      |
| mkr1.3834267  | 1      | 1      | NaN     | 1      |
| mkr1.4667697  | 0.7484 | 0.8561 | 0.3276  | 0.8415 |
| mkr1.5000315  | 1      | 1      | NaN     | 1      |
| mkr1.5000447  | 0.95   | 0.9744 | 0       | 0.9744 |
| mkr1.5258772  | 1      | 1      | NaN     | 1      |
| mkr1.6031297  | 1      | 1      | NaN     | 1      |
| mkr1.756157   | 0.95   | 0.9744 | 0       | 0.9744 |
| mkr1.797167   | 0.8976 | 0.946  | -0.0293 | 0.9445 |
| mkr1.8682937  | 0.95   | 0.9743 | 0.0007  | 0.9744 |
| mkr1.9086673  | 1      | 1      | NaN     | 1      |
| mkr1.9188212  | 0.9474 | 0.973  | -0.0007 | 0.973  |
| mkr1.9514500  | 1      | 1      | NaN     | 1      |
| mkr10.1069886 | 0.6834 | 0.8119 | -0.2007 | 0.7824 |
| mkr10.2088328 | 1      | 1      | NaN     | 1      |
| mkr10.2344075 | 1      | 1      | NaN     | 1      |
| mkr10.2642987 | 0.7275 | 0.8422 | -0.0525 | 0.8448 |
| mkr10.2678665 | 0.8475 | 0.9175 | 0.6538  | 0.9146 |
| mkr10.3618008 | 0.6271 | 0.7708 | -0.2667 | 0.7264 |
| mkr10.3750117 | 0.9024 | 0.9487 | -0.0263 | 0.9474 |
| mkr10.3750236 | 1      | 1      | NaN     | 1      |
| mkr10.3799509 | 0.9025 | 0.9488 | -0.027  | 0.9474 |
| mkr10.4181606 | 1      | 1      | NaN     | 1      |
| mkr10.6615687 | 0.7815 | 0.8774 | 0.4563  | 0.8681 |
| mkr10.6884138 | 0.8015 | 0.8898 | -0.089  | 0.8812 |

|                |        |        |         |        |
|----------------|--------|--------|---------|--------|
| mkr10.703320   | 0.9025 | 0.9488 | -0.027  | 0.9474 |
| mkr10.8226518  | 0.8503 | 0.9191 | -0.0595 | 0.9147 |
| mkr10.8317121  | 1      | 1      | NaN     | 1      |
| mkr10.8372011  | 1      | 1      | NaN     | 1      |
| mkr10.8461747  | 0.8479 | 0.9177 | -0.0194 | 0.9188 |
| mkr10.8577966  | 0.6105 | 0.7582 | -0.2833 | 0.7096 |
| mkr10.8688970  | 0.8974 | 0.9459 | -0.0278 | 0.9445 |
| mkr10.8956479  | 1      | 1      | NaN     | 1      |
| mkr10.9464492  | 1      | 1      | NaN     | 1      |
| mkr100.1554397 | 0.8528 | 0.9206 | -0.0179 | 0.9217 |
| mkr100.563038  | 0.9025 | 0.9488 | -0.027  | 0.9474 |
| mkr101.1142418 | 1      | 1      | NaN     | 1      |
| mkr101.1218462 | 0.9474 | 0.973  | 0       | 0.973  |
| mkr101.1218548 | 0.9474 | 0.973  | -0.0007 | 0.973  |
| mkr101.1308428 | 1      | 1      | NaN     | 1      |
| mkr101.1853558 | 1      | 1      | NaN     | 1      |
| mkr101.2002976 | 1      | 1      | NaN     | 1      |
| mkr101.2318917 | 0.892  | 0.9429 | -0.0303 | 0.9413 |
| mkr101.2583528 | 0.95   | 0.9743 | 0.0007  | 0.9744 |
| mkr102.105429  | 1      | 1      | NaN     | 1      |
| mkr102.105497  | 1      | 1      | NaN     | 1      |
| mkr102.1157010 | 1      | 1      | NaN     | 1      |
| mkr102.1562998 | 1      | 1      | NaN     | 1      |
| mkr102.1887828 | 0.9025 | 0.9488 | -0.027  | 0.9474 |
| mkr102.1942689 | 0.6113 | 0.7587 | -0.2864 | 0.7097 |
| mkr102.1980144 | 0.9024 | 0.9487 | -0.0263 | 0.9474 |
| mkr102.2092170 | 1      | 1      | NaN     | 1      |
| mkr102.2179904 | 1      | 1      | NaN     | 1      |
| mkr102.246486  | 1      | 1      | NaN     | 1      |
| mkr102.859476  | 0.95   | 0.9744 | 0       | 0.9744 |
| mkr102.979529  | 1      | 1      | NaN     | 1      |
| mkr103.1012007 | 1      | 1      | NaN     | 1      |
| mkr103.1033445 | 1      | 1      | NaN     | 1      |
| mkr103.1083538 | 1      | 1      | NaN     | 1      |
| mkr103.119969  | 1      | 1      | NaN     | 1      |
| mkr103.1440300 | 0.9025 | 0.9488 | -0.027  | 0.9474 |
| mkr103.1580105 | 1      | 1      | NaN     | 1      |
| mkr103.2073852 | 1      | 1      | NaN     | 1      |
| mkr103.2307980 | 0.95   | 0.9744 | 0       | 0.9744 |
| mkr103.304062  | 0.7627 | 0.8654 | -0.1257 | 0.851  |
| mkr103.312831  | 1      | 1      | NaN     | 1      |
| mkr103.397897  | 1      | 1      | NaN     | 1      |

|                |        |        |         |        |
|----------------|--------|--------|---------|--------|
| mkr103.427188  | 1      | 1      | NaN     | 1      |
| mkr103.47424   | 0.95   | 0.9744 | 0       | 0.9744 |
| mkr103.47438   | 1      | 1      | NaN     | 1      |
| mkr103.514288  | 0.6129 | 0.76   | -0.2822 | 0.7118 |
| mkr103.621702  | 1      | 1      | NaN     | 1      |
| mkr103.644855  | 1      | 1      | NaN     | 1      |
| mkr103.768628  | 1      | 1      | NaN     | 1      |
| mkr103.903069  | 0.95   | 0.9743 | 0.0007  | 0.9744 |
| mkr103.950342  | 1      | 1      | NaN     | 1      |
| mkr105.1362742 | 0.6113 | 0.7587 | -0.2864 | 0.7097 |
| mkr105.1636303 | 1      | 1      | NaN     | 1      |
| mkr105.2141154 | 0.6657 | 0.7993 | 0.2881  | 0.7705 |
| mkr105.2327575 | 1      | 1      | NaN     | 1      |
| mkr105.283835  | 0.9024 | 0.9487 | -0.0263 | 0.9474 |
| mkr106.1012963 | 0.7088 | 0.8296 | -0.1738 | 0.8058 |
| mkr106.1399010 | 1      | 1      | NaN     | 1      |
| mkr106.1585378 | 0.9474 | 0.973  | 0       | 0.973  |
| mkr106.1660566 | 0.6441 | 0.7835 | 0.0762  | 0.7461 |
| mkr106.1694946 | 1      | 1      | NaN     | 1      |
| mkr106.1780131 | 0.8368 | 0.9112 | -0.02   | 0.9126 |
| mkr106.1804476 | 0.9474 | 0.973  | -0.0007 | 0.973  |
| mkr106.1809812 | 0.8861 | 0.9396 | -0.0346 | 0.9376 |
| mkr106.1955076 | 1      | 1      | NaN     | 1      |
| mkr106.195850  | 0.9474 | 0.973  | -0.0007 | 0.973  |
| mkr106.196115  | 0.8921 | 0.943  | -0.0318 | 0.9413 |
| mkr106.2001338 | 0.9024 | 0.9487 | -0.0263 | 0.9474 |
| mkr106.2022136 | 0.5979 | 0.7483 | -0.1203 | 0.7455 |
| mkr106.2056114 | 1      | 1      | NaN     | 1      |
| mkr106.2225648 | 0.9445 | 0.9715 | -0.0008 | 0.9714 |
| mkr106.2285191 | 0.7241 | 0.84   | -0.1571 | 0.8194 |
| mkr106.641794  | 0.9445 | 0.9715 | -0.0015 | 0.9714 |
| mkr106.654872  | 0.9474 | 0.973  | -0.0007 | 0.973  |
| mkr106.718178  | 0.9474 | 0.973  | -0.0007 | 0.973  |
| mkr106.732910  | 1      | 1      | NaN     | 1      |
| mkr106.732973  | 1      | 1      | NaN     | 1      |
| mkr106.765308  | 0.9444 | 0.9714 | 0       | 0.9714 |
| mkr106.889318  | 0.7241 | 0.84   | -0.1571 | 0.8194 |
| mkr106.902824  | 0.8573 | 0.9232 | -0.0556 | 0.9193 |
| mkr106.958209  | 0.9474 | 0.973  | 0       | 0.973  |
| mkr106.960449  | 0.6809 | 0.8102 | 0.1503  | 0.782  |
| mkr106.979373  | 1      | 1      | NaN     | 1      |
| mkr107.63323   | 1      | 1      | NaN     | 1      |

|                |        |        |         |        |
|----------------|--------|--------|---------|--------|
| mkr108.1174693 | 1      | 1      | NaN     | 1      |
| mkr108.1174858 | 1      | 1      | NaN     | 1      |
| mkr108.1513665 | 1      | 1      | NaN     | 1      |
| mkr109.1542895 | 0.9499 | 0.9743 | 0.0023  | 0.9744 |
| mkr109.1927103 | 0.6496 | 0.7876 | 0.1281  | 0.7523 |
| mkr109.2129748 | 1      | 1      | NaN     | 1      |
| mkr109.2314746 | 0.95   | 0.9744 | 0       | 0.9744 |
| mkr11.1820591  | 1      | 1      | NaN     | 1      |
| mkr11.1840866  | 0.9474 | 0.973  | -0.0007 | 0.973  |
| mkr11.1840908  | 1      | 1      | NaN     | 1      |
| mkr11.1860811  | 0.6064 | 0.755  | 0.2962  | 0.7087 |
| mkr11.2274731  | 0.8858 | 0.9395 | -0.0323 | 0.9376 |
| mkr11.4017683  | 0.9499 | 0.9743 | 0.0015  | 0.9744 |
| mkr11.4108123  | 0.6271 | 0.7708 | -0.2667 | 0.7264 |
| mkr11.4202504  | 0.7342 | 0.8467 | -0.1515 | 0.8275 |
| mkr11.4329962  | 0.6524 | 0.7896 | -0.2323 | 0.7528 |
| mkr11.4650925  | 1      | 1      | NaN     | 1      |
| mkr11.4651005  | 1      | 1      | NaN     | 1      |
| mkr11.4931156  | 0.8861 | 0.9396 | -0.0346 | 0.9376 |
| mkr11.5929334  | 0.8119 | 0.8962 | 0.4648  | 0.8897 |
| mkr11.8641264  | 0.892  | 0.9429 | 0       | 0.9444 |
| mkr110.1413215 | 0.9499 | 0.9743 | 0.0015  | 0.9744 |
| mkr110.1483181 | 0.9445 | 0.9715 | -0.0008 | 0.9714 |
| mkr110.1751283 | 0.8976 | 0.946  | -0.0293 | 0.9445 |
| mkr110.1751318 | 0.6834 | 0.8119 | -0.2007 | 0.7824 |
| mkr110.1964434 | 1      | 1      | NaN     | 1      |
| mkr111.1014607 | 1      | 1      | NaN     | 1      |
| mkr111.1183548 | 0.8887 | 0.9411 | -0.0001 | 0.9426 |
| mkr111.1265773 | 1      | 1      | NaN     | 1      |
| mkr111.1396077 | 1      | 1      | NaN     | 1      |
| mkr111.1446492 | 1      | 1      | NaN     | 1      |
| mkr111.1714442 | 1      | 1      | NaN     | 1      |
| mkr111.2183230 | 1      | 1      | NaN     | 1      |
| mkr111.276283  | 1      | 1      | NaN     | 1      |
| mkr111.475213  | 1      | 1      | NaN     | 1      |
| mkr111.673317  | 1      | 1      | NaN     | 1      |
| mkr111.723082  | 1      | 1      | NaN     | 1      |
| mkr111.841535  | 0.95   | 0.9744 | 0       | 0.9744 |
| mkr112.508784  | 0.9474 | 0.973  | 0       | 0.973  |
| mkr113.1027945 | 1      | 1      | NaN     | 1      |
| mkr113.1078023 | 1      | 1      | NaN     | 1      |
| mkr113.1078069 | 1      | 1      | NaN     | 1      |



|                |        |        |         |        |
|----------------|--------|--------|---------|--------|
| mkr113.1250823 | 1      | 1      | NaN     | 1      |
| mkr113.1256930 | 0.6834 | 0.8119 | -0.2007 | 0.7824 |
| mkr113.1710021 | 0.7627 | 0.8654 | -0.1257 | 0.851  |
| mkr113.191603  | 1      | 1      | NaN     | 1      |
| mkr113.1923758 | 0.6658 | 0.7994 | 0.1407  | 0.7681 |
| mkr113.2248030 | 0.6781 | 0.8082 | -0.2032 | 0.7779 |
| mkr113.2250349 | 1      | 1      | NaN     | 1      |
| mkr113.344498  | 1      | 1      | NaN     | 1      |
| mkr113.864422  | 1      | 1      | NaN     | 1      |
| mkr114.1040362 | 0.95   | 0.9743 | 0.0007  | 0.9744 |
| mkr114.1602092 | 1      | 1      | NaN     | 1      |
| mkr114.2156074 | 1      | 1      | NaN     | 1      |
| mkr114.2162755 | 1      | 1      | NaN     | 1      |
| mkr114.2162757 | 1      | 1      | NaN     | 1      |
| mkr114.2180055 | 1      | 1      | NaN     | 1      |
| mkr114.2315433 | 0.6305 | 0.7734 | -0.2606 | 0.7302 |
| mkr114.2353327 | 1      | 1      | NaN     | 1      |
| mkr114.2355218 | 1      | 1      | NaN     | 1      |
| mkr114.274720  | 1      | 1      | NaN     | 1      |
| mkr114.274778  | 1      | 1      | NaN     | 1      |
| mkr114.317960  | 1      | 1      | NaN     | 1      |
| mkr114.699648  | 0.9473 | 0.973  | 0.0008  | 0.973  |
| mkr114.782134  | 1      | 1      | NaN     | 1      |
| mkr115.1654379 | 1      | 1      | NaN     | 1      |
| mkr115.1697367 | 0.6088 | 0.7569 | 0.0072  | 0.7092 |
| mkr115.1767806 | 0.95   | 0.9743 | 0.0007  | 0.9744 |
| mkr115.291751  | 0.8528 | 0.9206 | -0.0179 | 0.9217 |
| mkr115.713052  | 1      | 1      | NaN     | 1      |
| mkr115.904749  | 0.8339 | 0.9094 | -0.0683 | 0.9038 |
| mkr116.1492109 | 1      | 1      | NaN     | 1      |
| mkr116.1591708 | 0.8976 | 0.946  | -0.0293 | 0.9445 |
| mkr116.1735680 | 0.95   | 0.9744 | 0       | 0.9744 |
| mkr116.185362  | 0.9499 | 0.9743 | 0.0015  | 0.9744 |
| mkr116.2029862 | 1      | 1      | NaN     | 1      |
| mkr116.2264444 | 1      | 1      | NaN     | 1      |
| mkr116.516609  | 1      | 1      | NaN     | 1      |
| mkr117.1144138 | 1      | 1      | NaN     | 1      |
| mkr117.1144154 | 1      | 1      | NaN     | 1      |
| mkr117.1192545 | 1      | 1      | NaN     | 1      |
| mkr117.1972066 | 1      | 1      | NaN     | 1      |
| mkr117.377011  | 0.9474 | 0.973  | -0.0007 | 0.973  |
| mkr1173.4775   | 0.8454 | 0.9162 | -0.0035 | 0.9187 |

|                |        |        |         |        |
|----------------|--------|--------|---------|--------|
| mkr118.2170572 | 1      | 1      | NaN     | 1      |
| mkr118.2192593 | 0.6969 | 0.8214 | -0.1875 | 0.7948 |
| mkr118.480015  | 0.95   | 0.9744 | 0       | 0.9744 |
| mkr118.648598  | 0.8054 | 0.8922 | -0.0916 | 0.8835 |
| mkr118.686706  | 0.8573 | 0.9232 | -0.0556 | 0.9193 |
| mkr118.848647  | 0.8053 | 0.8922 | -0.0909 | 0.8835 |
| mkr1182.102    | 1      | 1      | NaN     | 1      |
| mkr1182.130    | 0.95   | 0.9744 | 0       | 0.9744 |
| mkr119.1566939 | 0.95   | 0.9743 | 0.0007  | 0.9744 |
| mkr119.1592583 | 0.9413 | 0.9698 | -0.0023 | 0.9697 |
| mkr119.206524  | 0.95   | 0.9744 | 0       | 0.9744 |
| mkr119.551740  | 0.6321 | 0.7745 | 0.5968  | 0.7396 |
| mkr12.1169539  | 1      | 1      | NaN     | 1      |
| mkr12.2224616  | 0.7059 | 0.8276 | 0.2265  | 0.8054 |
| mkr12.2435698  | 1      | 1      | NaN     | 1      |
| mkr12.3075415  | 0.6807 | 0.81   | 0.1509  | 0.782  |
| mkr12.4308460  | 0.5941 | 0.7454 | -0.309  | 0.691  |
| mkr12.4350566  | 0.8054 | 0.8922 | -0.0916 | 0.8835 |
| mkr12.4461222  | 1      | 1      | NaN     | 1      |
| mkr12.4470559  | 1      | 1      | NaN     | 1      |
| mkr12.4908925  | 0.5933 | 0.7448 | -0.306  | 0.6908 |
| mkr12.5744852  | 1      | 1      | NaN     | 1      |
| mkr12.6022370  | 0.95   | 0.9744 | 0       | 0.9744 |
| mkr12.6050047  | 0.6607 | 0.7957 | -0.2236 | 0.7609 |
| mkr12.7181313  | 0.95   | 0.9743 | 0.0007  | 0.9744 |
| mkr12.8352875  | 1      | 1      | NaN     | 1      |
| mkr120.1059008 | 0.6525 | 0.7897 | -0.233  | 0.7528 |
| mkr120.1429551 | 0.6305 | 0.7734 | -0.2606 | 0.7302 |
| mkr120.1557130 | 0.6525 | 0.7897 | -0.233  | 0.7528 |
| mkr120.1764231 | 1      | 1      | NaN     | 1      |
| mkr120.2095492 | 1      | 1      | NaN     | 1      |
| mkr120.324755  | 0.6305 | 0.7734 | -0.2606 | 0.7302 |
| mkr120.341231  | 1      | 1      | NaN     | 1      |
| mkr120.53063   | 1      | 1      | NaN     | 1      |
| mkr120.854943  | 0.7381 | 0.8493 | -0.1445 | 0.8313 |
| mkr121.1349034 | 1      | 1      | NaN     | 1      |
| mkr121.1981945 | 0.95   | 0.9744 | 0       | 0.9744 |
| mkr121.240226  | 0.6856 | 0.8135 | -0.1271 | 0.8017 |
| mkr121.761156  | 1      | 1      | NaN     | 1      |
| mkr121.761167  | 1      | 1      | NaN     | 1      |
| mkr122.1805593 | 1      | 1      | NaN     | 1      |
| mkr122.2064576 | 1      | 1      | NaN     | 1      |

|                |        |        |         |        |
|----------------|--------|--------|---------|--------|
| mkr123.1212281 | 0.6496 | 0.7876 | 0.1281  | 0.7523 |
| mkr123.1597303 | 1      | 1      | NaN     | 1      |
| mkr123.1597348 | 0.6101 | 0.7578 | 0.0472  | 0.7112 |
| mkr123.1856500 | 0.5941 | 0.7454 | -0.309  | 0.691  |
| mkr123.1997625 | 0.6347 | 0.7766 | -0.2531 | 0.735  |
| mkr123.288361  | 1      | 1      | NaN     | 1      |
| mkr123.386848  | 0.5937 | 0.745  | -0.3074 | 0.6909 |
| mkr123.386970  | 0.5937 | 0.745  | -0.3074 | 0.6909 |
| mkr124.1667602 | 1      | 1      | NaN     | 1      |
| mkr125.1904299 | 0.9499 | 0.9743 | 0.0023  | 0.9744 |
| mkr125.1904328 | 0.95   | 0.9743 | 0.0007  | 0.9744 |
| mkr125.302576  | 0.8976 | 0.946  | -0.0293 | 0.9445 |
| mkr126.1108268 | 1      | 1      | NaN     | 1      |
| mkr126.1153679 | 1      | 1      | NaN     | 1      |
| mkr126.1195706 | 0.8975 | 0.946  | 0       | 0.9473 |
| mkr126.1258056 | 1      | 1      | NaN     | 1      |
| mkr126.1829444 | 1      | 1      | NaN     | 1      |
| mkr126.216569  | 1      | 1      | NaN     | 1      |
| mkr127.2095058 | 0.8573 | 0.9232 | -0.0556 | 0.9193 |
| mkr127.494245  | 0.95   | 0.9743 | 0.0007  | 0.9744 |
| mkr127.697653  | 1      | 1      | NaN     | 1      |
| mkr128.1538240 | 1      | 1      | NaN     | 1      |
| mkr128.1966516 | 1      | 1      | NaN     | 1      |
| mkr128.301811  | 1      | 1      | NaN     | 1      |
| mkr128.417935  | 1      | 1      | NaN     | 1      |
| mkr128.432352  | 1      | 1      | NaN     | 1      |
| mkr128.798952  | 0.95   | 0.9744 | 0       | 0.9744 |
| mkr128.921623  | 0.9445 | 0.9715 | -0.0015 | 0.9714 |
| mkr129.1164946 | 0.95   | 0.9743 | 0.0007  | 0.9744 |
| mkr129.1192566 | 0.6612 | 0.7961 | -0.2258 | 0.761  |
| mkr13.1193273  | 0.8028 | 0.8906 | 0.4621  | 0.8833 |
| mkr13.1631145  | 0.9474 | 0.973  | -0.0007 | 0.973  |
| mkr13.2787548  | 0.6655 | 0.7992 | 0.1414  | 0.768  |
| mkr13.3659624  | 0.7511 | 0.8579 | -0.1348 | 0.8417 |
| mkr13.3714129  | 1      | 1      | NaN     | 1      |
| mkr13.3985261  | 1      | 1      | NaN     | 1      |
| mkr13.4964453  | 0.9474 | 0.973  | -0.0007 | 0.973  |
| mkr13.5125047  | 0.8136 | 0.8972 | -0.0813 | 0.8898 |
| mkr13.5487880  | 1      | 1      | NaN     | 1      |
| mkr13.5636012  | 1      | 1      | NaN     | 1      |
| mkr13.6263758  | 0.7627 | 0.8654 | -0.1257 | 0.851  |
| mkr13.6386857  | 0.6399 | 0.7804 | -0.1176 | 0.7747 |

|                |        |        |         |        |
|----------------|--------|--------|---------|--------|
| mkr13.7779905  | 1      | 1      | NaN     | 1      |
| mkr13.8441477  | 1      | 1      | NaN     | 1      |
| mkr130.1262569 | 1      | 1      | NaN     | 1      |
| mkr130.918603  | 1      | 1      | NaN     | 1      |
| mkr1302.680    | 0.7147 | 0.8336 | -0.0529 | 0.837  |
| mkr131.1115228 | 1      | 1      | NaN     | 1      |
| mkr131.1659470 | 0.5854 | 0.7385 | 0.4538  | 0.689  |
| mkr132.1920779 | 1      | 1      | NaN     | 1      |
| mkr132.306414  | 1      | 1      | NaN     | 1      |
| mkr132.312828  | 0.8426 | 0.9146 | -0.064  | 0.9096 |
| mkr132.348543  | 1      | 1      | NaN     | 1      |
| mkr132.627024  | 1      | 1      | NaN     | 1      |
| mkr132.954018  | 0.9474 | 0.973  | -0.0007 | 0.973  |
| mkr133.1214284 | 1      | 1      | NaN     | 1      |
| mkr133.1243437 | 0.6602 | 0.7954 | -0.2216 | 0.7608 |
| mkr133.1498314 | 1      | 1      | NaN     | 1      |
| mkr133.1517469 | 0.9474 | 0.973  | -0.0007 | 0.973  |
| mkr133.1650271 | 0.95   | 0.9743 | 0.0007  | 0.9744 |
| mkr133.1691350 | 1      | 1      | NaN     | 1      |
| mkr133.810225  | 1      | 1      | NaN     | 1      |
| mkr133.911751  | 0.6524 | 0.7896 | -0.2323 | 0.7528 |
| mkr134.1321441 | 0.9377 | 0.9678 | -0.0026 | 0.9677 |
| mkr134.1691066 | 0.95   | 0.9744 | 0       | 0.9744 |
| mkr134.181011  | 1      | 1      | NaN     | 1      |
| mkr134.1821046 | 0.6467 | 0.7855 | 0.4821  | 0.7518 |
| mkr134.191722  | 1      | 1      | NaN     | 1      |
| mkr135.1559648 | 1      | 1      | NaN     | 1      |
| mkr135.179715  | 1      | 1      | NaN     | 1      |
| mkr135.1954878 | 1      | 1      | NaN     | 1      |
| mkr136.1466936 | 1      | 1      | NaN     | 1      |
| mkr136.317137  | 1      | 1      | NaN     | 1      |
| mkr137.1055183 | 1      | 1      | NaN     | 1      |
| mkr137.1666100 | 0.95   | 0.9744 | 0       | 0.9744 |
| mkr137.522659  | 0.9025 | 0.9488 | -0.027  | 0.9474 |
| mkr137.735747  | 0.6834 | 0.8119 | -0.2007 | 0.7824 |
| mkr138.1146250 | 0.7625 | 0.8652 | -0.1242 | 0.851  |
| mkr138.1146252 | 0.7625 | 0.8652 | -0.1242 | 0.851  |
| mkr138.1158148 | 0.683  | 0.8116 | -0.1256 | 0.8003 |
| mkr138.1751258 | 1      | 1      | NaN     | 1      |
| mkr138.385861  | 0.666  | 0.7995 | 0.14    | 0.7681 |
| mkr138.904867  | 0.6997 | 0.8233 | -0.1102 | 0.8145 |
| mkr139.1113473 | 0.6111 | 0.7586 | -0.2857 | 0.7097 |

|                |        |        |         |        |
|----------------|--------|--------|---------|--------|
| mkr139.1512030 | 1      | 1      | NaN     | 1      |
| mkr139.1512150 | 0.6321 | 0.7745 | 0.5968  | 0.7396 |
| mkr139.541565  | 0.6687 | 0.8014 | -0.2157 | 0.7685 |
| mkr14.1232329  | 1      | 1      | NaN     | 1      |
| mkr14.1232448  | 1      | 1      | NaN     | 1      |
| mkr14.1412814  | 1      | 1      | NaN     | 1      |
| mkr14.1959611  | 0.6465 | 0.7853 | -0.242  | 0.7465 |
| mkr14.2340757  | 0.95   | 0.9744 | 0       | 0.9744 |
| mkr14.2368660  | 1      | 1      | NaN     | 1      |
| mkr14.2608120  | 0.95   | 0.9744 | 0       | 0.9744 |
| mkr14.2723817  | 0.7627 | 0.8654 | -0.1257 | 0.851  |
| mkr14.6883973  | 0.6458 | 0.7848 | -0.2389 | 0.7464 |
| mkr14.7646661  | 0.751  | 0.8578 | -0.1341 | 0.8417 |
| mkr140.1285494 | 1      | 1      | NaN     | 1      |
| mkr141.682262  | 0.8914 | 0.9426 | -0.0002 | 0.944  |
| mkr141.717827  | 1      | 1      | NaN     | 1      |
| mkr141.717891  | 1      | 1      | NaN     | 1      |
| mkr142.1407017 | 0.95   | 0.9743 | 0.0007  | 0.9744 |
| mkr142.507333  | 0.9474 | 0.973  | 0       | 0.973  |
| mkr143.1413477 | 1      | 1      | NaN     | 1      |
| mkr143.1548276 | 0.8976 | 0.946  | -0.0293 | 0.9445 |
| mkr144.1137020 | 0.95   | 0.9744 | 0       | 0.9744 |
| mkr144.1593204 | 0.9472 | 0.9729 | 0.0026  | 0.973  |
| mkr144.1622234 | 0.9445 | 0.9715 | -0.0015 | 0.9714 |
| mkr144.243483  | 1      | 1      | NaN     | 1      |
| mkr144.626463  | 1      | 1      | NaN     | 1      |
| mkr144.915570  | 0.8667 | 0.9286 | 1       | 0.9286 |
| mkr144.991276  | 0.6133 | 0.7603 | -0.1958 | 0.7352 |
| mkr145.473490  | 0.8054 | 0.8922 | -0.0916 | 0.8835 |
| mkr146.88596   | 0.6178 | 0.7638 | -0.2699 | 0.718  |
| mkr148.1119969 | 1      | 1      | NaN     | 1      |
| mkr148.1136272 | 0.95   | 0.9743 | 0.0007  | 0.9744 |
| mkr148.213738  | 1      | 1      | NaN     | 1      |
| mkr148.288787  | 1      | 1      | NaN     | 1      |
| mkr149.1197825 | 0.95   | 0.9743 | 0.0007  | 0.9744 |
| mkr149.1204263 | 0.95   | 0.9744 | 0       | 0.9744 |
| mkr149.1443155 | 1      | 1      | NaN     | 1      |
| mkr149.641793  | 0.9474 | 0.973  | -0.0007 | 0.973  |
| mkr149.749122  | 1      | 1      | NaN     | 1      |
| mkr149.777150  | 1      | 1      | NaN     | 1      |
| mkr149.930917  | 0.8976 | 0.946  | -0.0293 | 0.9445 |
| mkr15.1523105  | 0.8549 | 0.9218 | 0.6545  | 0.9191 |

|                |        |        |         |        |
|----------------|--------|--------|---------|--------|
| mkr15.1523178  | 1      | 1      | NaN     | 1      |
| mkr15.1790988  | 0.9474 | 0.973  | -0.0007 | 0.973  |
| mkr15.2030138  | 1      | 1      | NaN     | 1      |
| mkr15.2030146  | 1      | 1      | NaN     | 1      |
| mkr15.2509619  | 1      | 1      | NaN     | 1      |
| mkr15.2515403  | 0.7239 | 0.8399 | -0.1564 | 0.8193 |
| mkr15.2536144  | 0.6969 | 0.8214 | -0.1875 | 0.7948 |
| mkr15.3394172  | 0.7926 | 0.8843 | 0.4597  | 0.8762 |
| mkr15.3605310  | 1      | 1      | NaN     | 1      |
| mkr15.4347678  | 0.6969 | 0.8214 | -0.1875 | 0.7948 |
| mkr15.4349882  | 0.9474 | 0.973  | 0       | 0.973  |
| mkr15.5390570  | 0.7061 | 0.8278 | 0.2259  | 0.8054 |
| mkr15.6534150  | 0.95   | 0.9743 | 0.0007  | 0.9744 |
| mkr15.6534248  | 0.95   | 0.9744 | 0       | 0.9744 |
| mkr15.6765731  | 0.8426 | 0.9146 | -0.064  | 0.9096 |
| mkr15.6910019  | 1      | 1      | NaN     | 1      |
| mkr15.7292725  | 1      | 1      | NaN     | 1      |
| mkr15.7408194  | 0.7244 | 0.8402 | -0.0962 | 0.8335 |
| mkr15.7751170  | 1      | 1      | NaN     | 1      |
| mkr150.1455638 | 1      | 1      | NaN     | 1      |
| mkr150.62569   | 1      | 1      | NaN     | 1      |
| mkr1504.1884   | 1      | 1      | NaN     | 1      |
| mkr151.1108446 | 1      | 1      | NaN     | 1      |
| mkr151.1372725 | 0.8921 | 0.9429 | -0.0311 | 0.9413 |
| mkr151.1461990 | 0.8716 | 0.9314 | -0.0415 | 0.9288 |
| mkr151.1676036 | 0.95   | 0.9743 | 0.0007  | 0.9744 |
| mkr151.828829  | 0.8502 | 0.919  | -0.0173 | 0.9203 |
| mkr151.932942  | 0.9474 | 0.973  | -0.0007 | 0.973  |
| mkr152.1457730 | 0.7244 | 0.8402 | -0.0962 | 0.8335 |
| mkr152.1457734 | 0.7732 | 0.8721 | -0.117  | 0.8592 |
| mkr152.149395  | 1      | 1      | NaN     | 1      |
| mkr152.263656  | 1      | 1      | NaN     | 1      |
| mkr152.322123  | 1      | 1      | NaN     | 1      |
| mkr152.965466  | 1      | 1      | NaN     | 1      |
| mkr153.102606  | 0.684  | 0.8123 | -0.118  | 0.8024 |
| mkr153.199022  | 1      | 1      | NaN     | 1      |
| mkr153.328823  | 0.95   | 0.9744 | 0       | 0.9744 |
| mkr153.383313  | 0.9001 | 0.9474 | 0       | 0.9487 |
| mkr153.492544  | 0.722  | 0.8385 | -0.1613 | 0.8173 |
| mkr153.856555  | 1      | 1      | NaN     | 1      |
| mkr153.927391  | 1      | 1      | NaN     | 1      |
| mkr154.1486002 | 1      | 1      | NaN     | 1      |

|                |        |        |         |        |
|----------------|--------|--------|---------|--------|
| mkr154.63018   | 1      | 1      | NaN     | 1      |
| mkr155.1372172 | 1      | 1      | NaN     | 1      |
| mkr155.1520985 | 1      | 1      | NaN     | 1      |
| mkr155.294078  | 1      | 1      | NaN     | 1      |
| mkr155.834309  | 0.6567 | 0.7928 | 0.1957  | 0.7603 |
| mkr155.834312  | 0.7082 | 0.8292 | -0.171  | 0.8057 |
| mkr156.1614803 | 0.5917 | 0.7435 | 0.6095  | 0.7192 |
| mkr156.424817  | 1      | 1      | NaN     | 1      |
| mkr156.525366  | 0.95   | 0.9743 | 0.0007  | 0.9744 |
| mkr156.792769  | 1      | 1      | NaN     | 1      |
| mkr156.832127  | 1      | 1      | NaN     | 1      |
| mkr156.834315  | 0.8143 | 0.8977 | -0.0857 | 0.8899 |
| mkr157.1213716 | 1      | 1      | NaN     | 1      |
| mkr157.316126  | 1      | 1      | NaN     | 1      |
| mkr157.316235  | 1      | 1      | NaN     | 1      |
| mkr157.574609  | 0.6353 | 0.7769 | -0.1724 | 0.7566 |
| mkr157.580939  | 1      | 1      | NaN     | 1      |
| mkr157.586784  | 0.8858 | 0.9394 | 0       | 0.9411 |
| mkr158.1131427 | 0.8976 | 0.946  | -0.0293 | 0.9445 |
| mkr158.1158719 | 0.834  | 0.9095 | -0.069  | 0.9038 |
| mkr158.1254210 | 1      | 1      | NaN     | 1      |
| mkr158.1294688 | 1      | 1      | NaN     | 1      |
| mkr158.1371642 | 0.6809 | 0.8102 | 0.1503  | 0.782  |
| mkr158.235316  | 1      | 1      | NaN     | 1      |
| mkr158.620001  | 1      | 1      | NaN     | 1      |
| mkr159.550691  | 0.95   | 0.9744 | 0       | 0.9744 |
| mkr159.550743  | 0.95   | 0.9744 | 0       | 0.9744 |
| mkr159.550755  | 0.95   | 0.9744 | 0       | 0.9744 |
| mkr159.654801  | 1      | 1      | NaN     | 1      |
| mkr159.85245   | 1      | 1      | NaN     | 1      |
| mkr159.924592  | 0.8528 | 0.9206 | -0.0179 | 0.9217 |
| mkr16.1217679  | 1      | 1      | NaN     | 1      |
| mkr16.1845283  | 1      | 1      | NaN     | 1      |
| mkr16.1886033  | 1      | 1      | NaN     | 1      |
| mkr16.1906385  | 0.6658 | 0.7994 | 0.1407  | 0.7681 |
| mkr16.2704747  | 0.8472 | 0.9173 | -0.0168 | 0.9188 |
| mkr16.313778   | 0.9025 | 0.9488 | -0.027  | 0.9474 |
| mkr16.3622993  | 1      | 1      | NaN     | 1      |
| mkr16.4535793  | 0.95   | 0.9744 | 0       | 0.9744 |
| mkr16.4571794  | 1      | 1      | NaN     | 1      |
| mkr16.4571812  | 1      | 1      | NaN     | 1      |
| mkr16.483002   | 0.95   | 0.9744 | 0       | 0.9744 |

|                |        |        |         |        |
|----------------|--------|--------|---------|--------|
| mkr16.6245735  | 1      | 1      | NaN     | 1      |
| mkr16.7276763  | 1      | 1      | NaN     | 1      |
| mkr160.277522  | 0.6064 | 0.755  | 0.2962  | 0.7087 |
| mkr160.47482   | 1      | 1      | NaN     | 1      |
| mkr160.61332   | 0.5863 | 0.7392 | 0.574   | 0.6892 |
| mkr161.1087673 | 1      | 1      | NaN     | 1      |
| mkr161.1087676 | 1      | 1      | NaN     | 1      |
| mkr161.393289  | 1      | 1      | NaN     | 1      |
| mkr161.42395   | 1      | 1      | NaN     | 1      |
| mkr161.582474  | 0.609  | 0.757  | 0.3448  | 0.7343 |
| mkr161.649535  | 1      | 1      | NaN     | 1      |
| mkr161.676568  | 1      | 1      | NaN     | 1      |
| mkr162.1278520 | 1      | 1      | NaN     | 1      |
| mkr162.1278521 | 1      | 1      | NaN     | 1      |
| mkr162.268654  | 0.8398 | 0.9129 | -0.0206 | 0.9142 |
| mkr162.290035  | 1      | 1      | NaN     | 1      |
| mkr162.376048  | 0.7474 | 0.8554 | 0.3306  | 0.8414 |
| mkr162.376126  | 0.95   | 0.9744 | 0       | 0.9744 |
| mkr162.443346  | 0.6525 | 0.7897 | -0.233  | 0.7528 |
| mkr162.62736   | 0.8946 | 0.9444 | -0.0001 | 0.9457 |
| mkr162.757365  | 1      | 1      | NaN     | 1      |
| mkr162.770126  | 1      | 1      | NaN     | 1      |
| mkr162.91053   | 1      | 1      | NaN     | 1      |
| mkr162.956970  | 1      | 1      | NaN     | 1      |
| mkr163.1226308 | 0.6612 | 0.7961 | -0.2258 | 0.761  |
| mkr163.638421  | 1      | 1      | NaN     | 1      |
| mkr163.824742  | 1      | 1      | NaN     | 1      |
| mkr163.97009   | 0.6272 | 0.7709 | 0.1286  | 0.7531 |
| mkr164.1132220 | 1      | 1      | NaN     | 1      |
| mkr164.1188740 | 1      | 1      | NaN     | 1      |
| mkr164.758643  | 1      | 1      | NaN     | 1      |
| mkr164.969127  | 1      | 1      | NaN     | 1      |
| mkr165.663394  | 0.95   | 0.9744 | 0       | 0.9744 |
| mkr165.764309  | 1      | 1      | NaN     | 1      |
| mkr165.782176  | 1      | 1      | NaN     | 1      |
| mkr165.782224  | 0.6088 | 0.7569 | 0.0072  | 0.7092 |
| mkr166.1093952 | 1      | 1      | NaN     | 1      |
| mkr166.250237  | 0.8587 | 0.924  | 1       | 0.9231 |
| mkr167.256629  | 1      | 1      | NaN     | 1      |
| mkr168.402786  | 1      | 1      | NaN     | 1      |
| mkr168.402816  | 1      | 1      | NaN     | 1      |
| mkr168.5735    | 1      | 1      | NaN     | 1      |



|                |        |        |         |        |
|----------------|--------|--------|---------|--------|
| mkr168.730099  | 1      | 1      | NaN     | 1      |
| mkr168.876142  | 0.5892 | 0.7415 | 0.0788  | 0.6899 |
| mkr17.1039358  | 0.95   | 0.9744 | 0       | 0.9744 |
| mkr17.1226949  | 1      | 1      | NaN     | 1      |
| mkr17.1307673  | 0.95   | 0.9744 | 0       | 0.9744 |
| mkr17.1512663  | 1      | 1      | NaN     | 1      |
| mkr17.1786414  | 1      | 1      | NaN     | 1      |
| mkr17.1819650  | 1      | 1      | NaN     | 1      |
| mkr17.2230197  | 0.7341 | 0.8467 | -0.1508 | 0.8275 |
| mkr17.2683496  | 1      | 1      | NaN     | 1      |
| mkr17.3331825  | 1      | 1      | NaN     | 1      |
| mkr17.3698505  | 0.6943 | 0.8195 | -0.1874 | 0.7927 |
| mkr17.4010216  | 0.9025 | 0.9488 | -0.027  | 0.9474 |
| mkr17.5229934  | 0.6088 | 0.7569 | 0.0072  | 0.7092 |
| mkr17.6667332  | 1      | 1      | NaN     | 1      |
| mkr17.6824745  | 0.95   | 0.9744 | 0       | 0.9744 |
| mkr170.1026110 | 1      | 1      | NaN     | 1      |
| mkr170.1264595 | 1      | 1      | NaN     | 1      |
| mkr170.390019  | 0.9    | 0.9474 | 1       | 0.9474 |
| mkr170.952490  | 0.5889 | 0.7412 | 0.2844  | 0.6898 |
| mkr171.303063  | 0.95   | 0.9744 | 0       | 0.9744 |
| mkr171.529429  | 0.6269 | 0.7707 | -0.266  | 0.7264 |
| mkr173.1228639 | 1      | 1      | NaN     | 1      |
| mkr173.140530  | 1      | 1      | NaN     | 1      |
| mkr174.206573  | 1      | 1      | NaN     | 1      |
| mkr174.239994  | 1      | 1      | NaN     | 1      |
| mkr174.406499  | 0.95   | 0.9744 | 0       | 0.9744 |
| mkr174.406531  | 0.95   | 0.9744 | 0       | 0.9744 |
| mkr174.67367   | 0.6611 | 0.7959 | -0.2251 | 0.761  |
| mkr175.392192  | 1      | 1      | NaN     | 1      |
| mkr176.1055908 | 0.8975 | 0.946  | 0       | 0.9473 |
| mkr176.1066491 | 1      | 1      | NaN     | 1      |
| mkr176.107540  | 1      | 1      | NaN     | 1      |
| mkr176.765268  | 0.95   | 0.9744 | 0       | 0.9744 |
| mkr177.1111631 | 1      | 1      | NaN     | 1      |
| mkr177.317559  | 0.95   | 0.9744 | 0       | 0.9744 |
| mkr177.537945  | 1      | 1      | NaN     | 1      |
| mkr177.620048  | 1      | 1      | NaN     | 1      |
| mkr177.648866  | 1      | 1      | NaN     | 1      |
| mkr177.669209  | 0.9474 | 0.973  | -0.0007 | 0.973  |
| mkr177.701213  | 0.95   | 0.9744 | 0       | 0.9744 |
| mkr177.83871   | 1      | 1      | NaN     | 1      |

|                |        |        |         |        |
|----------------|--------|--------|---------|--------|
| mkr177.877241  | 0.8859 | 0.9395 | -0.0331 | 0.9376 |
| mkr177.877244  | 0.8859 | 0.9395 | -0.0331 | 0.9376 |
| mkr177.877373  | 1      | 1      | NaN     | 1      |
| mkr177.880089  | 1      | 1      | NaN     | 1      |
| mkr177.914961  | 1      | 1      | NaN     | 1      |
| mkr178.434137  | 0.95   | 0.9744 | 0       | 0.9744 |
| mkr179.1053590 | 1      | 1      | NaN     | 1      |
| mkr179.14604   | 1      | 1      | NaN     | 1      |
| mkr179.323859  | 1      | 1      | NaN     | 1      |
| mkr179.430578  | 1      | 1      | NaN     | 1      |
| mkr179.50706   | 1      | 1      | NaN     | 1      |
| mkr179.73846   | 0.9445 | 0.9715 | -0.0015 | 0.9714 |
| mkr179.73942   | 1      | 1      | NaN     | 1      |
| mkr179.753768  | 0.9474 | 0.973  | 0       | 0.973  |
| mkr18.1413995  | 0.6467 | 0.7855 | 0.4821  | 0.7518 |
| mkr18.143689   | 1      | 1      | NaN     | 1      |
| mkr18.1833273  | 0.6252 | 0.7694 | 0.3806  | 0.7292 |
| mkr18.2033928  | 0.6441 | 0.7835 | 0.0762  | 0.7461 |
| mkr18.209903   | 1      | 1      | NaN     | 1      |
| mkr18.2377684  | 0.6129 | 0.76   | -0.2822 | 0.7118 |
| mkr18.2406650  | 1      | 1      | NaN     | 1      |
| mkr18.3773861  | 0.6736 | 0.805  | -0.1367 | 0.7914 |
| mkr18.3995908  | 1      | 1      | NaN     | 1      |
| mkr18.4038452  | 0.7511 | 0.8579 | -0.1348 | 0.8417 |
| mkr18.4038625  | 0.95   | 0.9744 | 0       | 0.9744 |
| mkr18.4535886  | 0.892  | 0.9429 | 0       | 0.9444 |
| mkr18.4798728  | 0.7817 | 0.8775 | 0.4558  | 0.8681 |
| mkr18.4850170  | 1      | 1      | NaN     | 1      |
| mkr18.4850202  | 0.9474 | 0.973  | -0.0007 | 0.973  |
| mkr18.5133765  | 0.9474 | 0.973  | 0       | 0.973  |
| mkr18.5133866  | 0.95   | 0.9744 | 0       | 0.9744 |
| mkr18.6550292  | 0.95   | 0.9744 | 0       | 0.9744 |
| mkr18.945766   | 0.666  | 0.7995 | 0.14    | 0.7681 |
| mkr180.445468  | 0.8425 | 0.9145 | -0.0633 | 0.9096 |
| mkr180.786319  | 0.8053 | 0.8922 | -0.0909 | 0.8835 |
| mkr180.85087   | 0.6353 | 0.7769 | -0.1724 | 0.7566 |
| mkr181.1152942 | 0.9474 | 0.973  | -0.0007 | 0.973  |
| mkr181.636311  | 0.9499 | 0.9743 | 0.0015  | 0.9744 |
| mkr182.848172  | 0.9474 | 0.973  | 0       | 0.973  |
| mkr1822.584    | 1      | 1      | NaN     | 1      |
| mkr183.839513  | 0.7087 | 0.8295 | -0.1732 | 0.8057 |
| mkr183.979177  | 1      | 1      | NaN     | 1      |

|                |        |        |         |        |
|----------------|--------|--------|---------|--------|
| mkr184.174973  | 1      | 1      | NaN     | 1      |
| mkr184.175026  | 1      | 1      | NaN     | 1      |
| mkr184.376809  | 1      | 1      | NaN     | 1      |
| mkr184.520603  | 1      | 1      | NaN     | 1      |
| mkr184.555215  | 0.8423 | 0.9144 | -0.0183 | 0.9159 |
| mkr184.784426  | 0.9474 | 0.973  | 0       | 0.973  |
| mkr184.882249  | 1      | 1      | NaN     | 1      |
| mkr184.900042  | 0.8143 | 0.8977 | -0.0857 | 0.8899 |
| mkr185.1009272 | 1      | 1      | NaN     | 1      |
| mkr185.423674  | 0.7626 | 0.8653 | -0.125  | 0.851  |
| mkr185.767917  | 0.95   | 0.9743 | 0.0007  | 0.9744 |
| mkr186.143124  | 1      | 1      | NaN     | 1      |
| mkr186.210693  | 0.95   | 0.9744 | 0       | 0.9744 |
| mkr186.769539  | 1      | 1      | NaN     | 1      |
| mkr187.449360  | 1      | 1      | NaN     | 1      |
| mkr188.1008140 | 1      | 1      | NaN     | 1      |
| mkr188.216565  | 0.8569 | 0.9229 | -0.0523 | 0.9192 |
| mkr188.724000  | 1      | 1      | NaN     | 1      |
| mkr188.777573  | 0.95   | 0.9744 | 0       | 0.9744 |
| mkr188.78098   | 1      | 1      | NaN     | 1      |
| mkr189.439426  | 0.9236 | 0.9603 | -0.0072 | 0.96   |
| mkr189.650866  | 1      | 1      | NaN     | 1      |
| mkr189.708557  | 1      | 1      | NaN     | 1      |
| mkr19.1816203  | 0.9474 | 0.973  | -0.0007 | 0.973  |
| mkr19.1976816  | 1      | 1      | NaN     | 1      |
| mkr19.2295722  | 0.95   | 0.9744 | 0       | 0.9744 |
| mkr19.3280539  | 0.6113 | 0.7587 | -0.2864 | 0.7097 |
| mkr19.3351077  | 0.8793 | 0.9358 | -0.0378 | 0.9335 |
| mkr19.3353736  | 0.6313 | 0.774  | 0.1151  | 0.7343 |
| mkr19.3607860  | 0.95   | 0.9744 | 0       | 0.9744 |
| mkr19.4408722  | 1      | 1      | NaN     | 1      |
| mkr19.4408724  | 0.95   | 0.9744 | 0       | 0.9744 |
| mkr19.4625350  | 1      | 1      | NaN     | 1      |
| mkr19.6464786  | 0.8921 | 0.943  | -0.0318 | 0.9413 |
| mkr19.6601477  | 0.6128 | 0.7599 | -0.2815 | 0.7118 |
| mkr19.673603   | 0.95   | 0.9743 | 0.0007  | 0.9744 |
| mkr19.7047424  | 0.9499 | 0.9743 | 0.0015  | 0.9744 |
| mkr19.7047909  | 1      | 1      | NaN     | 1      |
| mkr190.910676  | 0.8426 | 0.9146 | -0.064  | 0.9096 |
| mkr190.910692  | 0.8426 | 0.9146 | -0.064  | 0.9096 |
| mkr190.934937  | 0.8573 | 0.9232 | -0.0556 | 0.9193 |
| mkr191.744332  | 0.95   | 0.9744 | 0       | 0.9744 |

|                |        |        |         |        |
|----------------|--------|--------|---------|--------|
| mkr192.1018857 | 0.95   | 0.9744 | 0       | 0.9744 |
| mkr192.43431   | 0.8142 | 0.8976 | -0.085  | 0.8898 |
| mkr192.902119  | 1      | 1      | NaN     | 1      |
| mkr193.1053642 | 1      | 1      | NaN     | 1      |
| mkr193.148470  | 1      | 1      | NaN     | 1      |
| mkr193.152612  | 0.9445 | 0.9715 | -0.0015 | 0.9714 |
| mkr193.228576  | 1      | 1      | NaN     | 1      |
| mkr193.402166  | 0.771  | 0.8707 | 0.3372  | 0.8591 |
| mkr193.418293  | 0.6464 | 0.7852 | 0.1364  | 0.7686 |
| mkr193.502936  | 0.7183 | 0.8361 | 0.2376  | 0.8168 |
| mkr193.525564  | 1      | 1      | NaN     | 1      |
| mkr193.533168  | 0.6923 | 0.8182 | 0.5     | 0.7941 |
| mkr193.692577  | 0.5944 | 0.7456 | -0.3103 | 0.6911 |
| mkr193.69558   | 1      | 1      | NaN     | 1      |
| mkr193.69564   | 1      | 1      | NaN     | 1      |
| mkr193.702131  | 0.9443 | 0.9713 | 0.0029  | 0.9714 |
| mkr193.724877  | 1      | 1      | NaN     | 1      |
| mkr193.740958  | 1      | 1      | NaN     | 1      |
| mkr193.854914  | 1      | 1      | NaN     | 1      |
| mkr193.863517  | 1      | 1      | NaN     | 1      |
| mkr193.987462  | 0.9444 | 0.9714 | 0.0009  | 0.9714 |
| mkr194.38402   | 1      | 1      | NaN     | 1      |
| mkr194.407196  | 0.6496 | 0.7876 | 0.1281  | 0.7523 |
| mkr194.724627  | 1      | 1      | NaN     | 1      |
| mkr195.1072271 | 0.6438 | 0.7833 | 0.0769  | 0.746  |
| mkr195.765770  | 1      | 1      | NaN     | 1      |
| mkr196.1018121 | 1      | 1      | NaN     | 1      |
| mkr196.269495  | 0.8143 | 0.8977 | -0.0857 | 0.8899 |
| mkr196.628083  | 0.9473 | 0.973  | 0.0008  | 0.973  |
| mkr196.628104  | 0.9024 | 0.9487 | -0.0263 | 0.9474 |
| mkr196.631070  | 1      | 1      | NaN     | 1      |
| mkr197.125383  | 1      | 1      | NaN     | 1      |
| mkr197.143069  | 0.95   | 0.9743 | 0.0007  | 0.9744 |
| mkr198.426720  | 0.8142 | 0.8976 | -0.085  | 0.8898 |
| mkr198.485086  | 0.7611 | 0.8643 | -0.044  | 0.8665 |
| mkr198.760162  | 1      | 1      | NaN     | 1      |
| mkr2.10447584  | 0.6601 | 0.7952 | -0.221  | 0.7608 |
| mkr2.11310365  | 1      | 1      | NaN     | 1      |
| mkr2.12883823  | 1      | 1      | NaN     | 1      |
| mkr2.12883824  | 1      | 1      | NaN     | 1      |
| mkr2.13257442  | 0.947  | 0.9728 | 0.0065  | 0.973  |
| mkr2.13440188  | 0.9025 | 0.9488 | -0.027  | 0.9474 |

|               |        |        |         |        |
|---------------|--------|--------|---------|--------|
| mkr2.13995060 | 1      | 1      | NaN     | 1      |
| mkr2.14092238 | 0.6834 | 0.8119 | -0.2007 | 0.7824 |
| mkr2.14092303 | 1      | 1      | NaN     | 1      |
| mkr2.14347389 | 1      | 1      | NaN     | 1      |
| mkr2.14347440 | 1      | 1      | NaN     | 1      |
| mkr2.14405244 | 1      | 1      | NaN     | 1      |
| mkr2.14427927 | 1      | 1      | NaN     | 1      |
| mkr2.14532622 | 0.9445 | 0.9715 | -0.0015 | 0.9714 |
| mkr2.14535182 | 1      | 1      | NaN     | 1      |
| mkr2.14631863 | 1      | 1      | NaN     | 1      |
| mkr2.14631878 | 0.6465 | 0.7853 | -0.242  | 0.7465 |
| mkr2.14709506 | 1      | 1      | NaN     | 1      |
| mkr2.14839272 | 1      | 1      | NaN     | 1      |
| mkr2.3150666  | 1      | 1      | NaN     | 1      |
| mkr2.3150679  | 1      | 1      | NaN     | 1      |
| mkr2.3150680  | 1      | 1      | NaN     | 1      |
| mkr2.5063818  | 1      | 1      | NaN     | 1      |
| mkr2.5063828  | 1      | 1      | NaN     | 1      |
| mkr2.554887   | 1      | 1      | NaN     | 1      |
| mkr2.6211177  | 0.6834 | 0.8119 | -0.2007 | 0.7824 |
| mkr2.6496237  | 1      | 1      | NaN     | 1      |
| mkr2.8547835  | 1      | 1      | NaN     | 1      |
| mkr2.9630646  | 0.6271 | 0.7708 | -0.2667 | 0.7264 |
| mkr2.9678773  | 1      | 1      | NaN     | 1      |
| mkr20.1074039 | 1      | 1      | NaN     | 1      |
| mkr20.1150236 | 1      | 1      | NaN     | 1      |
| mkr20.1509980 | 0.8573 | 0.9232 | -0.0556 | 0.9193 |
| mkr20.1509983 | 0.8573 | 0.9232 | -0.0556 | 0.9193 |
| mkr20.2766462 | 1      | 1      | NaN     | 1      |
| mkr20.3463531 | 1      | 1      | NaN     | 1      |
| mkr20.3505382 | 1      | 1      | NaN     | 1      |
| mkr20.4790663 | 0.6465 | 0.7853 | -0.242  | 0.7465 |
| mkr20.5405075 | 1      | 1      | NaN     | 1      |
| mkr20.5958172 | 1      | 1      | NaN     | 1      |
| mkr20.774181  | 0.9025 | 0.9488 | -0.027  | 0.9474 |
| mkr200.273479 | 0.8976 | 0.946  | -0.0293 | 0.9445 |
| mkr200.273504 | 0.9024 | 0.9487 | -0.0263 | 0.9474 |
| mkr200.273612 | 1      | 1      | NaN     | 1      |
| mkr200.53324  | 1      | 1      | NaN     | 1      |
| mkr200.799640 | 0.95   | 0.9744 | 0       | 0.9744 |
| mkr200.856936 | 0.8572 | 0.9231 | -0.0549 | 0.9193 |
| mkr201.101644 | 0.6034 | 0.7526 | -0.1477 | 0.7419 |

|               |        |        |         |        |
|---------------|--------|--------|---------|--------|
| mkr201.115074 | 0.7383 | 0.8494 | -0.1451 | 0.8313 |
| mkr201.340221 | 0.8416 | 0.914  | -0.0566 | 0.9095 |
| mkr201.400597 | 0.9474 | 0.973  | -0.0007 | 0.973  |
| mkr201.417722 | 0.8999 | 0.9473 | 1       | 0.9474 |
| mkr201.562207 | 0.6602 | 0.7954 | -0.2216 | 0.7608 |
| mkr202.852443 | 0.7061 | 0.8278 | 0.2259  | 0.8054 |
| mkr203.264364 | 0.8976 | 0.946  | -0.0293 | 0.9445 |
| mkr203.270115 | 0.9025 | 0.9488 | -0.027  | 0.9474 |
| mkr203.433118 | 1      | 1      | NaN     | 1      |
| mkr205.271553 | 1      | 1      | NaN     | 1      |
| mkr205.614613 | 0.8921 | 0.943  | -0.0318 | 0.9413 |
| mkr205.646374 | 0.95   | 0.9744 | 0       | 0.9744 |
| mkr206.336664 | 0.6271 | 0.7708 | -0.2667 | 0.7264 |
| mkr207.166589 | 0.95   | 0.9743 | 0.0007  | 0.9744 |
| mkr207.226853 | 0.95   | 0.9744 | 0       | 0.9744 |
| mkr207.271793 | 1      | 1      | NaN     | 1      |
| mkr207.366665 | 1      | 1      | NaN     | 1      |
| mkr207.409304 | 0.9445 | 0.9715 | -0.0015 | 0.9714 |
| mkr207.409342 | 1      | 1      | NaN     | 1      |
| mkr207.447307 | 1      | 1      | NaN     | 1      |
| mkr207.450361 | 1      | 1      | NaN     | 1      |
| mkr208.213442 | 0.9025 | 0.9488 | -0.027  | 0.9474 |
| mkr209.450133 | 0.9444 | 0.9714 | 0       | 0.9714 |
| mkr209.49367  | 0.6969 | 0.8214 | -0.1875 | 0.7948 |
| mkr21.1168407 | 1      | 1      | NaN     | 1      |
| mkr21.2195347 | 0.8946 | 0.9444 | -0.0001 | 0.9457 |
| mkr21.2243800 | 0.95   | 0.9744 | 0       | 0.9744 |
| mkr21.2910683 | 1      | 1      | NaN     | 1      |
| mkr21.3109889 | 1      | 1      | NaN     | 1      |
| mkr21.4930076 | 1      | 1      | NaN     | 1      |
| mkr21.5242487 | 1      | 1      | NaN     | 1      |
| mkr210.72804  | 0.95   | 0.9743 | 0.0007  | 0.9744 |
| mkr210.77395  | 0.9474 | 0.973  | -0.0007 | 0.973  |
| mkr211.558189 | 0.6687 | 0.8014 | -0.2157 | 0.7685 |
| mkr211.789289 | 1      | 1      | NaN     | 1      |
| mkr214.355176 | 1      | 1      | NaN     | 1      |
| mkr214.444070 | 0.9    | 0.9474 | 1       | 0.9474 |
| mkr214.463064 | 1      | 1      | NaN     | 1      |
| mkr214.463068 | 1      | 1      | NaN     | 1      |
| mkr214.613601 | 1      | 1      | NaN     | 1      |
| mkr214.677554 | 1      | 1      | NaN     | 1      |
| mkr214.753991 | 1      | 1      | NaN     | 1      |

|               |        |        |         |        |
|---------------|--------|--------|---------|--------|
| mkr214.765553 | 1      | 1      | NaN     | 1      |
| mkr215.432511 | 0.9474 | 0.973  | -0.0007 | 0.973  |
| mkr215.713627 | 0.8975 | 0.946  | 0       | 0.9473 |
| mkr216.536016 | 1      | 1      | NaN     | 1      |
| mkr217.472692 | 1      | 1      | NaN     | 1      |
| mkr217.480193 | 1      | 1      | NaN     | 1      |
| mkr218.404880 | 1      | 1      | NaN     | 1      |
| mkr218.527703 | 0.9474 | 0.973  | -0.0007 | 0.973  |
| mkr218.684867 | 0.6612 | 0.7961 | -0.2258 | 0.761  |
| mkr219.154502 | 0.95   | 0.9744 | 0       | 0.9744 |
| mkr219.282773 | 0.9474 | 0.973  | -0.0007 | 0.973  |
| mkr219.300214 | 0.9025 | 0.9488 | -0.027  | 0.9474 |
| mkr219.649956 | 0.9445 | 0.9715 | -0.0015 | 0.9714 |
| mkr219.678498 | 0.6129 | 0.76   | -0.2822 | 0.7118 |
| mkr22.1843435 | 1      | 1      | NaN     | 1      |
| mkr22.2382596 | 0.79   | 0.8827 | 1       | 0.876  |
| mkr22.2628020 | 1      | 1      | NaN     | 1      |
| mkr22.3768916 | 0.8426 | 0.9146 | -0.064  | 0.9096 |
| mkr22.3768958 | 0.8426 | 0.9146 | -0.064  | 0.9096 |
| mkr22.3768967 | 0.8426 | 0.9146 | -0.064  | 0.9096 |
| mkr22.3769024 | 0.8503 | 0.9191 | -0.0595 | 0.9147 |
| mkr22.3944791 | 0.95   | 0.9743 | 0.0007  | 0.9744 |
| mkr22.4015123 | 1      | 1      | NaN     | 1      |
| mkr22.4477242 | 1      | 1      | NaN     | 1      |
| mkr22.5891032 | 1      | 1      | NaN     | 1      |
| mkr22.5959475 | 0.7088 | 0.8296 | -0.1738 | 0.8058 |
| mkr22.6622454 | 0.95   | 0.9743 | 0.0007  | 0.9744 |
| mkr22.913075  | 0.6346 | 0.7764 | -0.2525 | 0.735  |
| mkr220.155160 | 0.95   | 0.9744 | 0       | 0.9744 |
| mkr220.495450 | 0.9413 | 0.9698 | -0.0023 | 0.9697 |
| mkr220.696506 | 1      | 1      | NaN     | 1      |
| mkr220.741458 | 0.95   | 0.9744 | 0       | 0.9744 |
| mkr221.357981 | 0.6833 | 0.8118 | -0.2    | 0.7824 |
| mkr221.671816 | 1      | 1      | NaN     | 1      |
| mkr222.134524 | 0.5944 | 0.7456 | -0.3103 | 0.6911 |
| mkr222.317699 | 1      | 1      | NaN     | 1      |
| mkr222.351354 | 1      | 1      | NaN     | 1      |
| mkr222.351393 | 1      | 1      | NaN     | 1      |
| mkr222.41876  | 1      | 1      | NaN     | 1      |
| mkr222.41905  | 1      | 1      | NaN     | 1      |
| mkr222.459495 | 0.6946 | 0.8198 | 0.1593  | 0.7944 |
| mkr222.538406 | 0.7845 | 0.8793 | -0.1043 | 0.8683 |

|               |        |        |         |        |
|---------------|--------|--------|---------|--------|
| mkr222.602115 | 1      | 1      | NaN     | 1      |
| mkr222.643136 | 0.95   | 0.9744 | 0       | 0.9744 |
| mkr222.782475 | 0.5874 | 0.7401 | 0.487   | 0.6895 |
| mkr222.782479 | 0.5874 | 0.7401 | 0.487   | 0.6895 |
| mkr223.770973 | 0.95   | 0.9743 | 0.0007  | 0.9744 |
| mkr223.770979 | 0.95   | 0.9743 | 0.0007  | 0.9744 |
| mkr224.296675 | 0.6465 | 0.7853 | -0.242  | 0.7465 |
| mkr224.387080 | 1      | 1      | NaN     | 1      |
| mkr224.619455 | 1      | 1      | NaN     | 1      |
| mkr225.417828 | 0.5944 | 0.7456 | -0.3103 | 0.6911 |
| mkr225.600890 | 0.95   | 0.9744 | 0       | 0.9744 |
| mkr226.400460 | 0.95   | 0.9743 | 0.0007  | 0.9744 |
| mkr227.140519 | 1      | 1      | NaN     | 1      |
| mkr227.140520 | 0.95   | 0.9744 | 0       | 0.9744 |
| mkr227.318668 | 1      | 1      | NaN     | 1      |
| mkr227.461254 | 0.95   | 0.9744 | 0       | 0.9744 |
| mkr227.470495 | 1      | 1      | NaN     | 1      |
| mkr227.499785 | 1      | 1      | NaN     | 1      |
| mkr227.603308 | 1      | 1      | NaN     | 1      |
| mkr227.603345 | 1      | 1      | NaN     | 1      |
| mkr227.629583 | 0.9474 | 0.973  | -0.0007 | 0.973  |
| mkr228.251373 | 1      | 1      | NaN     | 1      |
| mkr228.704839 | 0.95   | 0.9743 | 0.0007  | 0.9744 |
| mkr229.169341 | 0.9498 | 0.9743 | 0.0033  | 0.9744 |
| mkr229.34198  | 0.7465 | 0.8548 | -0.0785 | 0.8506 |
| mkr23.1502215 | 1      | 1      | NaN     | 1      |
| mkr23.2074824 | 0.5944 | 0.7456 | -0.3103 | 0.6911 |
| mkr23.2244807 | 0.6163 | 0.7626 | 0.3982  | 0.7275 |
| mkr23.2437244 | 1      | 1      | NaN     | 1      |
| mkr23.27718   | 1      | 1      | NaN     | 1      |
| mkr23.3928440 | 1      | 1      | NaN     | 1      |
| mkr23.3928457 | 1      | 1      | NaN     | 1      |
| mkr23.4241463 | 0.9499 | 0.9743 | 0.0023  | 0.9744 |
| mkr23.526752  | 1      | 1      | NaN     | 1      |
| mkr23.725455  | 0.95   | 0.9744 | 0       | 0.9744 |
| mkr23.77553   | 1      | 1      | NaN     | 1      |
| mkr230.191204 | 1      | 1      | NaN     | 1      |
| mkr230.197486 | 1      | 1      | NaN     | 1      |
| mkr230.322809 | 1      | 1      | NaN     | 1      |
| mkr230.735168 | 0.6305 | 0.7734 | -0.2606 | 0.7302 |
| mkr231.108225 | 1      | 1      | NaN     | 1      |
| mkr232.149836 | 0.9024 | 0.9487 | -0.0263 | 0.9474 |



|               |        |        |         |        |
|---------------|--------|--------|---------|--------|
| mkr232.426604 | 1      | 1      | NaN     | 1      |
| mkr233.480098 | 1      | 1      | NaN     | 1      |
| mkr233.497769 | 1      | 1      | NaN     | 1      |
| mkr233.570500 | 0.95   | 0.9743 | 0.0007  | 0.9744 |
| mkr233.570638 | 1      | 1      | NaN     | 1      |
| mkr233.690040 | 1      | 1      | NaN     | 1      |
| mkr234.107047 | 0.9174 | 0.9569 | -0.009  | 0.9565 |
| mkr235.174220 | 1      | 1      | NaN     | 1      |
| mkr235.357273 | 0.95   | 0.9744 | 0       | 0.9744 |
| mkr235.665471 | 1      | 1      | NaN     | 1      |
| mkr236.70524  | 0.9474 | 0.973  | -0.0007 | 0.973  |
| mkr236.78155  | 0.9474 | 0.973  | -0.0007 | 0.973  |
| mkr237.197775 | 1      | 1      | NaN     | 1      |
| mkr237.197777 | 1      | 1      | NaN     | 1      |
| mkr238.273505 | 0.7541 | 0.8598 | -0.0464 | 0.8619 |
| mkr24.14251   | 0.7733 | 0.8722 | -0.1176 | 0.8593 |
| mkr24.1498642 | 0.95   | 0.9744 | 0       | 0.9744 |
| mkr24.1498644 | 0.95   | 0.9744 | 0       | 0.9744 |
| mkr24.1833004 | 1      | 1      | NaN     | 1      |
| mkr24.2241099 | 1      | 1      | NaN     | 1      |
| mkr24.4409104 | 0.9174 | 0.9569 | -0.009  | 0.9565 |
| mkr24.4409149 | 0.9174 | 0.9569 | -0.009  | 0.9565 |
| mkr24.5476125 | 0.95   | 0.9744 | 0       | 0.9744 |
| mkr24.5476147 | 0.95   | 0.9744 | 0       | 0.9744 |
| mkr24.5624486 | 1      | 1      | NaN     | 1      |
| mkr24.5786366 | 1      | 1      | NaN     | 1      |
| mkr24.6110632 | 0.8573 | 0.9232 | -0.0556 | 0.9193 |
| mkr24.6391865 | 0.8054 | 0.8922 | -0.0916 | 0.8835 |
| mkr24.862     | 0.6465 | 0.7853 | -0.242  | 0.7465 |
| mkr24.869308  | 0.6834 | 0.8119 | -0.2007 | 0.7824 |
| mkr24.869335  | 0.7383 | 0.8494 | -0.1451 | 0.8313 |
| mkr24.907126  | 1      | 1      | NaN     | 1      |
| mkr24.913299  | 0.7732 | 0.8721 | -0.117  | 0.8592 |
| mkr240.104056 | 0.95   | 0.9743 | 0.0007  | 0.9744 |
| mkr240.195412 | 0.9445 | 0.9715 | -0.0015 | 0.9714 |
| mkr240.276728 | 0.6612 | 0.7961 | -0.2258 | 0.761  |
| mkr240.276762 | 0.7088 | 0.8296 | -0.1738 | 0.8058 |
| mkr240.75600  | 1      | 1      | NaN     | 1      |
| mkr240.75601  | 1      | 1      | NaN     | 1      |
| mkr241.12159  | 0.95   | 0.9744 | 0       | 0.9744 |
| mkr241.189666 | 0.95   | 0.9744 | 0       | 0.9744 |
| mkr241.189725 | 1      | 1      | NaN     | 1      |

|               |        |        |         |        |
|---------------|--------|--------|---------|--------|
| mkr241.196102 | 1      | 1      | NaN     | 1      |
| mkr242.326181 | 0.8975 | 0.946  | 0       | 0.9473 |
| mkr243.350504 | 1      | 1      | NaN     | 1      |
| mkr247.554489 | 0.6249 | 0.7692 | 0.3812  | 0.7291 |
| mkr247.578070 | 0.6525 | 0.7897 | -0.233  | 0.7528 |
| mkr247.578218 | 0.6687 | 0.8014 | -0.2157 | 0.7685 |
| mkr247.590201 | 0.6833 | 0.8118 | -0.2    | 0.7824 |
| mkr248.366607 | 1      | 1      | NaN     | 1      |
| mkr248.79966  | 1      | 1      | NaN     | 1      |
| mkr249.209454 | 1      | 1      | NaN     | 1      |
| mkr249.305594 | 0.8143 | 0.8977 | -0.0857 | 0.8899 |
| mkr25.1064715 | 1      | 1      | NaN     | 1      |
| mkr25.1213568 | 1      | 1      | NaN     | 1      |
| mkr25.1963261 | 0.8975 | 0.946  | 0       | 0.9473 |
| mkr25.2559622 | 0.9445 | 0.9715 | -0.0015 | 0.9714 |
| mkr25.3518295 | 1      | 1      | NaN     | 1      |
| mkr25.3924423 | 0.95   | 0.9743 | 0.0007  | 0.9744 |
| mkr25.4270124 | 0.9474 | 0.973  | -0.0007 | 0.973  |
| mkr25.4629633 | 0.8573 | 0.9232 | -0.0556 | 0.9193 |
| mkr25.4732765 | 0.95   | 0.9744 | 0       | 0.9744 |
| mkr25.5762978 | 1      | 1      | NaN     | 1      |
| mkr25.840042  | 0.95   | 0.9744 | 0       | 0.9744 |
| mkr251.251362 | 1      | 1      | NaN     | 1      |
| mkr252.364678 | 1      | 1      | NaN     | 1      |
| mkr252.364747 | 1      | 1      | NaN     | 1      |
| mkr252.371880 | 0.9474 | 0.973  | -0.0007 | 0.973  |
| mkr252.371886 | 0.9474 | 0.973  | -0.0007 | 0.973  |
| mkr252.399910 | 1      | 1      | NaN     | 1      |
| mkr253.360905 | 1      | 1      | NaN     | 1      |
| mkr253.360999 | 0.95   | 0.9744 | 0       | 0.9744 |
| mkr253.393972 | 0.6113 | 0.7587 | -0.2864 | 0.7097 |
| mkr254.324439 | 1      | 1      | NaN     | 1      |
| mkr254.363505 | 0.9474 | 0.973  | -0.0007 | 0.973  |
| mkr254.46043  | 0.9474 | 0.973  | -0.0007 | 0.973  |
| mkr255.145939 | 1      | 1      | NaN     | 1      |
| mkr255.261604 | 0.8921 | 0.9429 | -0.0311 | 0.9413 |
| mkr255.49565  | 1      | 1      | NaN     | 1      |
| mkr255.535692 | 0.6305 | 0.7734 | -0.2606 | 0.7302 |
| mkr256.351542 | 0.7088 | 0.8296 | -0.1738 | 0.8058 |
| mkr258.335614 | 1      | 1      | NaN     | 1      |
| mkr258.41376  | 0.6549 | 0.7914 | -0.1442 | 0.7769 |
| mkr258.593310 | 1      | 1      | NaN     | 1      |

|               |        |        |         |        |
|---------------|--------|--------|---------|--------|
| mkr259.129750 | 0.8397 | 0.9129 | 0.6522  | 0.9094 |
| mkr259.89154  | 0.9024 | 0.9487 | -0.0263 | 0.9474 |
| mkr26.117534  | 1      | 1      | NaN     | 1      |
| mkr26.1362137 | 0.9499 | 0.9743 | 0.0015  | 0.9744 |
| mkr26.2061138 | 0.95   | 0.9744 | 0       | 0.9744 |
| mkr26.2173499 | 0.9474 | 0.973  | -0.0007 | 0.973  |
| mkr26.2173503 | 0.9474 | 0.973  | -0.0007 | 0.973  |
| mkr26.2904773 | 1      | 1      | NaN     | 1      |
| mkr26.2904783 | 1      | 1      | NaN     | 1      |
| mkr26.5190071 | 0.7511 | 0.8579 | -0.1348 | 0.8417 |
| mkr26.6481310 | 1      | 1      | NaN     | 1      |
| mkr260.187819 | 0.8528 | 0.9206 | -0.0179 | 0.9217 |
| mkr260.187900 | 1      | 1      | NaN     | 1      |
| mkr260.187907 | 1      | 1      | NaN     | 1      |
| mkr260.244333 | 0.8143 | 0.8977 | -0.0857 | 0.8899 |
| mkr260.72995  | 1      | 1      | NaN     | 1      |
| mkr261.199959 | 1      | 1      | NaN     | 1      |
| mkr261.233122 | 1      | 1      | NaN     | 1      |
| mkr261.333769 | 1      | 1      | NaN     | 1      |
| mkr261.333792 | 1      | 1      | NaN     | 1      |
| mkr261.337724 | 1      | 1      | NaN     | 1      |
| mkr265.270501 | 0.8789 | 0.9355 | 0       | 0.9374 |
| mkr267.174073 | 1      | 1      | NaN     | 1      |
| mkr267.174228 | 0.9474 | 0.973  | -0.0007 | 0.973  |
| mkr267.232348 | 0.95   | 0.9744 | 0       | 0.9744 |
| mkr267.241526 | 0.8714 | 0.9313 | -0.0391 | 0.9288 |
| mkr267.291298 | 1      | 1      | NaN     | 1      |
| mkr267.480796 | 1      | 1      | NaN     | 1      |
| mkr267.481950 | 0.95   | 0.9743 | 0.0007  | 0.9744 |
| mkr267.526200 | 0.9474 | 0.973  | -0.0007 | 0.973  |
| mkr267.71183  | 0.95   | 0.9744 | 0       | 0.9744 |
| mkr268.555387 | 0.6465 | 0.7853 | -0.242  | 0.7465 |
| mkr269.94077  | 1      | 1      | NaN     | 1      |
| mkr27.3981126 | 1      | 1      | NaN     | 1      |
| mkr27.4205615 | 1      | 1      | NaN     | 1      |
| mkr27.5203032 | 0.9025 | 0.9488 | -0.027  | 0.9474 |
| mkr27.5513976 | 0.6305 | 0.7734 | -0.2606 | 0.7302 |
| mkr27.6104071 | 0.7956 | 0.8862 | -0.0982 | 0.8764 |
| mkr27.6546901 | 1      | 1      | NaN     | 1      |
| mkr2718.183   | 1      | 1      | NaN     | 1      |
| mkr272.208488 | 0.7817 | 0.8775 | 0.4558  | 0.8681 |
| mkr272.370532 | 0.9473 | 0.973  | 0.0008  | 0.973  |

|               |        |        |         |        |
|---------------|--------|--------|---------|--------|
| mkr272.486229 | 0.95   | 0.9743 | 0.0007  | 0.9744 |
| mkr273.227287 | 0.8502 | 0.919  | -0.0173 | 0.9203 |
| mkr273.553359 | 1      | 1      | NaN     | 1      |
| mkr275.173698 | 1      | 1      | NaN     | 1      |
| mkr275.173724 | 1      | 1      | NaN     | 1      |
| mkr275.279378 | 1      | 1      | NaN     | 1      |
| mkr2753.501   | 0.9377 | 0.9678 | -0.0026 | 0.9677 |
| mkr2753.518   | 0.85   | 0.9189 | -0.0572 | 0.9147 |
| mkr276.189406 | 1      | 1      | NaN     | 1      |
| mkr276.278368 | 1      | 1      | NaN     | 1      |
| mkr276.283073 | 1      | 1      | NaN     | 1      |
| mkr276.322713 | 0.663  | 0.7973 | -0.0957 | 0.7952 |
| mkr277.153935 | 0.9445 | 0.9715 | -0.0015 | 0.9714 |
| mkr277.153938 | 0.9445 | 0.9715 | -0.0015 | 0.9714 |
| mkr277.177680 | 1      | 1      | NaN     | 1      |
| mkr278.313152 | 0.6967 | 0.8213 | -0.1868 | 0.7947 |
| mkr278.469404 | 0.8919 | 0.9429 | -0.0294 | 0.9413 |
| mkr279.171044 | 0.73   | 0.8439 | 0.3673  | 0.8408 |
| mkr279.193965 | 0.95   | 0.9744 | 0       | 0.9744 |
| mkr279.194013 | 0.95   | 0.9744 | 0       | 0.9744 |
| mkr279.54390  | 0.8426 | 0.9146 | -0.064  | 0.9096 |
| mkr28.1254555 | 1      | 1      | NaN     | 1      |
| mkr28.1739822 | 1      | 1      | NaN     | 1      |
| mkr28.2474234 | 0.7956 | 0.8862 | -0.0982 | 0.8764 |
| mkr28.2867294 | 1      | 1      | NaN     | 1      |
| mkr28.2867336 | 0.6478 | 0.7862 | 0.1337  | 0.752  |
| mkr28.3287342 | 1      | 1      | NaN     | 1      |
| mkr28.3484353 | 0.8143 | 0.8977 | -0.0857 | 0.8899 |
| mkr28.3649848 | 1      | 1      | NaN     | 1      |
| mkr28.4358131 | 0.6867 | 0.8142 | 0.2702  | 0.805  |
| mkr28.5875859 | 1      | 1      | NaN     | 1      |
| mkr28.634265  | 0.7602 | 0.8638 | 0.3327  | 0.8508 |
| mkr28.6518358 | 1      | 1      | NaN     | 1      |
| mkr28.6518363 | 1      | 1      | NaN     | 1      |
| mkr28.74404   | 0.6943 | 0.8195 | -0.1874 | 0.7927 |
| mkr28.917083  | 0.7733 | 0.8722 | -0.1176 | 0.8593 |
| mkr280.51631  | 1      | 1      | NaN     | 1      |
| mkr281.418560 | 1      | 1      | NaN     | 1      |
| mkr282.305424 | 1      | 1      | NaN     | 1      |
| mkr282.468875 | 1      | 1      | NaN     | 1      |
| mkr284.116517 | 0.8678 | 0.9292 | 1       | 0.9286 |
| mkr284.235598 | 0.8949 | 0.9445 | 1       | 0.9444 |

|               |        |        |         |        |
|---------------|--------|--------|---------|--------|
| mkr284.361601 | 1      | 1      | NaN     | 1      |
| mkr284.361613 | 1      | 1      | NaN     | 1      |
| mkr284.499949 | 0.8921 | 0.943  | -0.0318 | 0.9413 |
| mkr284.70531  | 1      | 1      | NaN     | 1      |
| mkr286.310860 | 0.6602 | 0.7954 | -0.2216 | 0.7608 |
| mkr289.228029 | 1      | 1      | NaN     | 1      |
| mkr289.77171  | 1      | 1      | NaN     | 1      |
| mkr29.1422968 | 1      | 1      | NaN     | 1      |
| mkr29.1933214 | 1      | 1      | NaN     | 1      |
| mkr29.2448843 | 1      | 1      | NaN     | 1      |
| mkr29.3528400 | 0.9376 | 0.9678 | -0.001  | 0.9677 |
| mkr29.3798479 | 0.95   | 0.9744 | 0       | 0.9744 |
| mkr29.3798481 | 1      | 1      | NaN     | 1      |
| mkr29.3843418 | 1      | 1      | NaN     | 1      |
| mkr29.3949242 | 0.5941 | 0.7454 | -0.309  | 0.691  |
| mkr29.4104712 | 1      | 1      | NaN     | 1      |
| mkr29.417650  | 1      | 1      | NaN     | 1      |
| mkr29.4252059 | 0.9024 | 0.9487 | -0.0263 | 0.9474 |
| mkr29.4702840 | 0.6749 | 0.8059 | 0.2073  | 0.7774 |
| mkr29.4702843 | 0.7046 | 0.8267 | 0.3075  | 0.8052 |
| mkr29.495144  | 1      | 1      | NaN     | 1      |
| mkr29.5049077 | 0.95   | 0.9743 | 0.0007  | 0.9744 |
| mkr290.247997 | 0.6195 | 0.7651 | -0.0914 | 0.7683 |
| mkr290.438464 | 0.6525 | 0.7897 | -0.233  | 0.7528 |
| mkr291.125728 | 1      | 1      | NaN     | 1      |
| mkr291.199767 | 1      | 1      | NaN     | 1      |
| mkr291.202434 | 0.6064 | 0.755  | 0.2962  | 0.7087 |
| mkr291.284082 | 0.7577 | 0.8621 | 0.7802  | 0.8505 |
| mkr291.363685 | 0.7059 | 0.8276 | 0.2265  | 0.8054 |
| mkr293.211443 | 0.8975 | 0.946  | 0       | 0.9473 |
| mkr293.22850  | 0.9474 | 0.973  | 0       | 0.973  |
| mkr293.74250  | 0.8563 | 0.9226 | 1       | 0.923  |
| mkr296.455363 | 0.95   | 0.9744 | 0       | 0.9744 |
| mkr297.402156 | 0.6687 | 0.8014 | -0.2157 | 0.7685 |
| mkr297.402181 | 0.7593 | 0.8632 | -0.1244 | 0.8487 |
| mkr297.456558 | 0.7239 | 0.8399 | -0.1564 | 0.8193 |
| mkr298.303033 | 1      | 1      | NaN     | 1      |
| mkr298.303102 | 1      | 1      | NaN     | 1      |
| mkr3.1016203  | 0.5905 | 0.7425 | 0.0289  | 0.6902 |
| mkr3.11028420 | 0.6525 | 0.7897 | -0.233  | 0.7528 |
| mkr3.11373809 | 0.95   | 0.9744 | 0       | 0.9744 |
| mkr3.11373827 | 0.6486 | 0.7869 | -0.1603 | 0.7689 |

|               |        |        |         |        |
|---------------|--------|--------|---------|--------|
| mkr3.11611815 | 0.6923 | 0.8182 | 0.5     | 0.7941 |
| mkr3.12216193 | 1      | 1      | NaN     | 1      |
| mkr3.12245187 | 1      | 1      | NaN     | 1      |
| mkr3.12245309 | 0.8975 | 0.946  | -0.0286 | 0.9445 |
| mkr3.13886974 | 1      | 1      | NaN     | 1      |
| mkr3.2128488  | 0.95   | 0.9743 | 0.0007  | 0.9744 |
| mkr3.2777527  | 0.95   | 0.9744 | 0       | 0.9744 |
| mkr3.292180   | 1      | 1      | NaN     | 1      |
| mkr3.3097978  | 0.61   | 0.7577 | 0.7572  | 0.7204 |
| mkr3.3968735  | 1      | 1      | NaN     | 1      |
| mkr3.4669043  | 0.7034 | 0.8259 | 0.6171  | 0.8051 |
| mkr3.5383062  | 1      | 1      | NaN     | 1      |
| mkr3.56287    | 0.6101 | 0.7578 | 0.0472  | 0.7112 |
| mkr3.6074543  | 0.9445 | 0.9715 | -0.0015 | 0.9714 |
| mkr3.621103   | 1      | 1      | NaN     | 1      |
| mkr3.655411   | 1      | 1      | NaN     | 1      |
| mkr3.7191262  | 1      | 1      | NaN     | 1      |
| mkr3.7270882  | 1      | 1      | NaN     | 1      |
| mkr3.7828470  | 0.95   | 0.9744 | 0       | 0.9744 |
| mkr3.8188830  | 0.5931 | 0.7446 | -0.3052 | 0.6908 |
| mkr3.8607270  | 1      | 1      | NaN     | 1      |
| mkr3.9947178  | 1      | 1      | NaN     | 1      |
| mkr30.1849742 | 1      | 1      | NaN     | 1      |
| mkr30.2324055 | 0.6084 | 0.7566 | 0.107   | 0.7131 |
| mkr30.3623984 | 1      | 1      | NaN     | 1      |
| mkr30.4120609 | 0.95   | 0.9743 | 0.0007  | 0.9744 |
| mkr30.4308219 | 0.8949 | 0.9445 | 1       | 0.9444 |
| mkr30.485987  | 0.95   | 0.9744 | 0       | 0.9744 |
| mkr30.5317468 | 1      | 1      | NaN     | 1      |
| mkr30.5317586 | 0.9474 | 0.973  | 0       | 0.973  |
| mkr30.5469598 | 1      | 1      | NaN     | 1      |
| mkr30.5469625 | 1      | 1      | NaN     | 1      |
| mkr30.6098430 | 1      | 1      | NaN     | 1      |
| mkr30.791489  | 0.9377 | 0.9678 | -0.0033 | 0.9677 |
| mkr300.173097 | 0.9474 | 0.973  | -0.0007 | 0.973  |
| mkr302.304431 | 0.8793 | 0.9358 | -0.0378 | 0.9335 |
| mkr302.348846 | 0.95   | 0.9744 | 0       | 0.9744 |
| mkr307.157379 | 0.7708 | 0.8706 | 0.3378  | 0.859  |
| mkr307.328465 | 0.8921 | 0.943  | -0.0318 | 0.9413 |
| mkr308.316951 | 1      | 1      | NaN     | 1      |
| mkr309.150929 | 1      | 1      | NaN     | 1      |
| mkr309.392171 | 0.6822 | 0.8111 | 0.7699  | 0.7886 |

|               |        |        |         |        |
|---------------|--------|--------|---------|--------|
| mkr31.1237369 | 1      | 1      | NaN     | 1      |
| mkr31.1237404 | 0.95   | 0.9744 | 0       | 0.9744 |
| mkr31.1672513 | 1      | 1      | NaN     | 1      |
| mkr31.1797613 | 1      | 1      | NaN     | 1      |
| mkr31.1822847 | 1      | 1      | NaN     | 1      |
| mkr31.1822887 | 1      | 1      | NaN     | 1      |
| mkr31.1916802 | 0.95   | 0.9744 | 0       | 0.9744 |
| mkr31.2262838 | 1      | 1      | NaN     | 1      |
| mkr31.2946476 | 0.95   | 0.9744 | 0       | 0.9744 |
| mkr31.3029619 | 1      | 1      | NaN     | 1      |
| mkr31.3096958 | 1      | 1      | NaN     | 1      |
| mkr31.3367673 | 1      | 1      | NaN     | 1      |
| mkr31.4066376 | 1      | 1      | NaN     | 1      |
| mkr31.4362176 | 1      | 1      | NaN     | 1      |
| mkr31.4843010 | 1      | 1      | NaN     | 1      |
| mkr31.649722  | 0.9474 | 0.973  | -0.0007 | 0.973  |
| mkr310.145937 | 1      | 1      | NaN     | 1      |
| mkr311.330558 | 0.9412 | 0.9697 | -0.0009 | 0.9697 |
| mkr313.361797 | 1      | 1      | NaN     | 1      |
| mkr314.116425 | 1      | 1      | NaN     | 1      |
| mkr314.181610 | 1      | 1      | NaN     | 1      |
| mkr315.166357 | 0.6969 | 0.8214 | -0.1875 | 0.7948 |
| mkr317.268201 | 0.9413 | 0.9698 | -0.0023 | 0.9697 |
| mkr32.1171719 | 1      | 1      | NaN     | 1      |
| mkr32.1479523 | 1      | 1      | NaN     | 1      |
| mkr32.1707924 | 0.9473 | 0.973  | 0.0008  | 0.973  |
| mkr32.2151495 | 1      | 1      | NaN     | 1      |
| mkr32.2551051 | 1      | 1      | NaN     | 1      |
| mkr32.2841893 | 1      | 1      | NaN     | 1      |
| mkr32.3471997 | 1      | 1      | NaN     | 1      |
| mkr32.4037168 | 1      | 1      | NaN     | 1      |
| mkr32.4472722 | 1      | 1      | NaN     | 1      |
| mkr32.480568  | 1      | 1      | NaN     | 1      |
| mkr32.4879890 | 0.5913 | 0.7432 | 0.3382  | 0.7182 |
| mkr32.5715629 | 1      | 1      | NaN     | 1      |
| mkr32.588851  | 1      | 1      | NaN     | 1      |
| mkr32.5893909 | 0.95   | 0.9744 | 0       | 0.9744 |
| mkr32.6117142 | 1      | 1      | NaN     | 1      |
| mkr32.96945   | 1      | 1      | NaN     | 1      |
| mkr321.67545  | 0.8143 | 0.8977 | -0.0857 | 0.8899 |
| mkr3242.427   | 1      | 1      | NaN     | 1      |
| mkr3246.203   | 0.7221 | 0.8386 | -0.162  | 0.8173 |

|               |        |        |         |        |
|---------------|--------|--------|---------|--------|
| mkr326.106038 | 1      | 1      | NaN     | 1      |
| mkr326.106175 | 1      | 1      | NaN     | 1      |
| mkr326.108168 | 1      | 1      | NaN     | 1      |
| mkr326.108181 | 1      | 1      | NaN     | 1      |
| mkr326.236274 | 0.9001 | 0.9474 | 0       | 0.9487 |
| mkr326.365303 | 1      | 1      | NaN     | 1      |
| mkr327.298291 | 1      | 1      | NaN     | 1      |
| mkr328.180836 | 0.95   | 0.9744 | 0       | 0.9744 |
| mkr328.180930 | 1      | 1      | NaN     | 1      |
| mkr328.254502 | 0.9098 | 0.9528 | -0.0087 | 0.9524 |
| mkr328.272931 | 1      | 1      | NaN     | 1      |
| mkr33.4329467 | 0.9474 | 0.973  | -0.0007 | 0.973  |
| mkr33.4451453 | 1      | 1      | NaN     | 1      |
| mkr33.5156858 | 1      | 1      | NaN     | 1      |
| mkr33.5224335 | 0.8479 | 0.9177 | -0.0194 | 0.9188 |
| mkr331.317749 | 1      | 1      | NaN     | 1      |
| mkr331.317782 | 0.7733 | 0.8722 | -0.1176 | 0.8593 |
| mkr331.317813 | 1      | 1      | NaN     | 1      |
| mkr331.353575 | 1      | 1      | NaN     | 1      |
| mkr332.103334 | 1      | 1      | NaN     | 1      |
| mkr332.187915 | 0.8921 | 0.943  | -0.0318 | 0.9413 |
| mkr332.300787 | 1      | 1      | NaN     | 1      |
| mkr332.343815 | 0.95   | 0.9743 | 0.0007  | 0.9744 |
| mkr337.180402 | 1      | 1      | NaN     | 1      |
| mkr337.215124 | 1      | 1      | NaN     | 1      |
| mkr337.215134 | 1      | 1      | NaN     | 1      |
| mkr337.215138 | 1      | 1      | NaN     | 1      |
| mkr339.17259  | 1      | 1      | NaN     | 1      |
| mkr339.46552  | 0.95   | 0.9744 | 0       | 0.9744 |
| mkr339.88600  | 1      | 1      | NaN     | 1      |
| mkr34.1374429 | 1      | 1      | NaN     | 1      |
| mkr34.4530139 | 0.9473 | 0.973  | 0.0008  | 0.973  |
| mkr34.4708280 | 0.6801 | 0.8096 | -0.124  | 0.7987 |
| mkr34.5017438 | 1      | 1      | NaN     | 1      |
| mkr34.5237847 | 0.6465 | 0.7853 | -0.242  | 0.7465 |
| mkr343.224310 | 0.6567 | 0.7928 | -0.2066 | 0.7603 |
| mkr345.251717 | 0.5941 | 0.7454 | -0.309  | 0.691  |
| mkr345.251747 | 0.6781 | 0.8082 | -0.2032 | 0.7779 |
| mkr349.25045  | 1      | 1      | NaN     | 1      |
| mkr35.1080179 | 1      | 1      | NaN     | 1      |
| mkr35.1419730 | 1      | 1      | NaN     | 1      |
| mkr35.142159  | 0.8975 | 0.946  | -0.0286 | 0.9445 |



|               |        |        |         |        |
|---------------|--------|--------|---------|--------|
| mkr35.187861  | 0.8359 | 0.9106 | 1       | 0.9092 |
| mkr35.194525  | 0.8573 | 0.9232 | -0.0556 | 0.9193 |
| mkr35.2846676 | 1      | 1      | NaN     | 1      |
| mkr35.288320  | 1      | 1      | NaN     | 1      |
| mkr35.3072993 | 0.6463 | 0.7852 | -0.2414 | 0.7465 |
| mkr35.369787  | 1      | 1      | NaN     | 1      |
| mkr35.370052  | 1      | 1      | NaN     | 1      |
| mkr35.3868074 | 0.7627 | 0.8654 | -0.1257 | 0.851  |
| mkr35.4032477 | 1      | 1      | NaN     | 1      |
| mkr35.4453004 | 0.95   | 0.9744 | 0       | 0.9744 |
| mkr35.4696724 | 0.95   | 0.9744 | 0       | 0.9744 |
| mkr35.4720520 | 0.8975 | 0.946  | 0       | 0.9473 |
| mkr35.5106080 | 1      | 1      | NaN     | 1      |
| mkr35.5272756 | 0.95   | 0.9744 | 0       | 0.9744 |
| mkr35.561676  | 0.95   | 0.9744 | 0       | 0.9744 |
| mkr35.623598  | 0.8976 | 0.946  | -0.0293 | 0.9445 |
| mkr35.623628  | 0.8976 | 0.946  | -0.0293 | 0.9445 |
| mkr35.960460  | 1      | 1      | NaN     | 1      |
| mkr351.234340 | 1      | 1      | NaN     | 1      |
| mkr352.172633 | 1      | 1      | NaN     | 1      |
| mkr354.105964 | 0.6465 | 0.7853 | -0.242  | 0.7465 |
| mkr355.275309 | 0.7341 | 0.8467 | -0.1508 | 0.8275 |
| mkr357.147375 | 1      | 1      | NaN     | 1      |
| mkr357.183060 | 1      | 1      | NaN     | 1      |
| mkr358.218506 | 1      | 1      | NaN     | 1      |
| mkr36.1172752 | 0.8309 | 0.9076 | 0.6508  | 0.9036 |
| mkr36.1646712 | 0.9496 | 0.9742 | 0.0071  | 0.9744 |
| mkr36.2855869 | 0.95   | 0.9743 | 0.0007  | 0.9744 |
| mkr36.2991930 | 1      | 1      | NaN     | 1      |
| mkr36.3001036 | 0.95   | 0.9744 | 0       | 0.9744 |
| mkr36.3884773 | 0.95   | 0.9744 | 0       | 0.9744 |
| mkr36.4717295 | 1      | 1      | NaN     | 1      |
| mkr361.241421 | 0.9445 | 0.9715 | -0.0015 | 0.9714 |
| mkr362.156650 | 1      | 1      | NaN     | 1      |
| mkr363.116741 | 0.95   | 0.9744 | 0       | 0.9744 |
| mkr363.99662  | 0.9474 | 0.973  | -0.0007 | 0.973  |
| mkr363.99715  | 1      | 1      | NaN     | 1      |
| mkr368.131125 | 1      | 1      | NaN     | 1      |
| mkr368.134659 | 0.7171 | 0.8353 | 0.6206  | 0.8167 |
| mkr368.171494 | 1      | 1      | NaN     | 1      |
| mkr368.89586  | 0.8975 | 0.946  | 0       | 0.9473 |
| mkr37.1032298 | 0.6226 | 0.7674 | 0.3066  | 0.7255 |

|               |        |        |         |        |
|---------------|--------|--------|---------|--------|
| mkr37.1533667 | 0.95   | 0.9744 | 0       | 0.9744 |
| mkr37.1703419 | 0.95   | 0.9744 | 0       | 0.9744 |
| mkr37.1934173 | 0.618  | 0.7639 | -0.1845 | 0.7413 |
| mkr37.2133145 | 1      | 1      | NaN     | 1      |
| mkr37.279921  | 0.7383 | 0.8494 | -0.1451 | 0.8313 |
| mkr37.2845350 | 0.95   | 0.9743 | 0.0007  | 0.9744 |
| mkr37.3393984 | 0.8015 | 0.8898 | -0.089  | 0.8812 |
| mkr37.4879993 | 0.95   | 0.9744 | 0       | 0.9744 |
| mkr370.26376  | 0.9025 | 0.9488 | -0.027  | 0.9474 |
| mkr370.74982  | 0.748  | 0.8558 | 0.3609  | 0.8545 |
| mkr371.168396 | 0.6276 | 0.7712 | 0.0634  | 0.7297 |
| mkr372.211285 | 0.7877 | 0.8812 | -0.0981 | 0.8711 |
| mkr372.87880  | 0.95   | 0.9743 | 0.0007  | 0.9744 |
| mkr376.137341 | 1      | 1      | NaN     | 1      |
| mkr377.106966 | 0.9474 | 0.973  | -0.0007 | 0.973  |
| mkr378.205232 | 1      | 1      | NaN     | 1      |
| mkr378.218014 | 1      | 1      | NaN     | 1      |
| mkr378.88823  | 1      | 1      | NaN     | 1      |
| mkr379.29252  | 0.95   | 0.9744 | 0       | 0.9744 |
| mkr379.29356  | 0.95   | 0.9743 | 0.0007  | 0.9744 |
| mkr379.42035  | 0.9445 | 0.9715 | -0.0015 | 0.9714 |
| mkr379.42039  | 1      | 1      | NaN     | 1      |
| mkr379.42764  | 0.8891 | 0.9413 | 0       | 0.9428 |
| mkr38.1544539 | 1      | 1      | NaN     | 1      |
| mkr38.1544564 | 1      | 1      | NaN     | 1      |
| mkr38.2028038 | 0.8057 | 0.8924 | -0.027  | 0.8948 |
| mkr38.2111260 | 1      | 1      | NaN     | 1      |
| mkr38.2111269 | 1      | 1      | NaN     | 1      |
| mkr38.2111273 | 1      | 1      | NaN     | 1      |
| mkr38.2348076 | 1      | 1      | NaN     | 1      |
| mkr38.2348122 | 1      | 1      | NaN     | 1      |
| mkr38.2529240 | 0.95   | 0.9744 | 0       | 0.9744 |
| mkr38.2756460 | 1      | 1      | NaN     | 1      |
| mkr38.302681  | 1      | 1      | NaN     | 1      |
| mkr38.3098970 | 0.95   | 0.9743 | 0.0007  | 0.9744 |
| mkr38.4329266 | 1      | 1      | NaN     | 1      |
| mkr38.4347834 | 0.95   | 0.9744 | 0       | 0.9744 |
| mkr38.4347843 | 0.95   | 0.9744 | 0       | 0.9744 |
| mkr38.4822818 | 1      | 1      | NaN     | 1      |
| mkr38.4844915 | 0.9025 | 0.9488 | -0.027  | 0.9474 |
| mkr38.4947770 | 1      | 1      | NaN     | 1      |
| mkr38.4996752 | 0.9474 | 0.973  | -0.0007 | 0.973  |

|               |        |        |         |        |
|---------------|--------|--------|---------|--------|
| mkr38.604156  | 0.8135 | 0.8972 | -0.0806 | 0.8898 |
| mkr38.608518  | 0.6834 | 0.8119 | -0.2007 | 0.7824 |
| mkr380.137971 | 1      | 1      | NaN     | 1      |
| mkr389.104292 | 0.9474 | 0.973  | -0.0007 | 0.973  |
| mkr389.163590 | 1      | 1      | NaN     | 1      |
| mkr389.163602 | 0.95   | 0.9744 | 0       | 0.9744 |
| mkr39.1416858 | 1      | 1      | NaN     | 1      |
| mkr39.1491462 | 0.95   | 0.9743 | 0.0007  | 0.9744 |
| mkr39.1607905 | 1      | 1      | NaN     | 1      |
| mkr39.1628137 | 1      | 1      | NaN     | 1      |
| mkr39.1678001 | 1      | 1      | NaN     | 1      |
| mkr39.2127710 | 1      | 1      | NaN     | 1      |
| mkr39.2130722 | 0.615  | 0.7616 | -0.2768 | 0.7145 |
| mkr39.2974115 | 0.6611 | 0.7959 | -0.2251 | 0.761  |
| mkr39.2974146 | 0.8572 | 0.9231 | -0.0549 | 0.9193 |
| mkr39.3204928 | 1      | 1      | NaN     | 1      |
| mkr39.3490698 | 0.6111 | 0.7586 | 0.0764  | 0.7347 |
| mkr39.3945912 | 0.6969 | 0.8214 | -0.1875 | 0.7948 |
| mkr39.4456156 | 1      | 1      | NaN     | 1      |
| mkr39.4486723 | 0.5922 | 0.7439 | -0.0411 | 0.6906 |
| mkr39.4854241 | 0.95   | 0.9744 | 0       | 0.9744 |
| mkr39.4871541 | 1      | 1      | NaN     | 1      |
| mkr390.60991  | 0.7139 | 0.8331 | -0.1034 | 0.8252 |
| mkr391.157492 | 1      | 1      | NaN     | 1      |
| mkr393.146428 | 1      | 1      | NaN     | 1      |
| mkr399.125100 | 1      | 1      | NaN     | 1      |
| mkr399.125168 | 1      | 1      | NaN     | 1      |
| mkr399.125180 | 1      | 1      | NaN     | 1      |
| mkr399.80889  | 0.6525 | 0.7897 | -0.233  | 0.7528 |
| mkr399.82559  | 0.7221 | 0.8386 | -0.162  | 0.8173 |
| mkr399.98415  | 0.6966 | 0.8212 | -0.1861 | 0.7947 |
| mkr4.10326095 | 0.9024 | 0.9487 | -0.0263 | 0.9474 |
| mkr4.10656303 | 0.6317 | 0.7743 | 0.5973  | 0.7395 |
| mkr4.11531224 | 0.95   | 0.9744 | 0       | 0.9744 |
| mkr4.12171468 | 0.7112 | 0.8312 | -0.102  | 0.8238 |
| mkr4.1285871  | 1      | 1      | NaN     | 1      |
| mkr4.1613340  | 0.7733 | 0.8722 | -0.1176 | 0.8593 |
| mkr4.2194360  | 0.9474 | 0.973  | -0.0007 | 0.973  |
| mkr4.2197934  | 0.9024 | 0.9487 | -0.0256 | 0.9474 |
| mkr4.2576835  | 0.7381 | 0.8493 | -0.1445 | 0.8313 |
| mkr4.2583221  | 0.7732 | 0.8721 | -0.117  | 0.8592 |
| mkr4.3169370  | 1      | 1      | NaN     | 1      |

|               |        |        |         |        |
|---------------|--------|--------|---------|--------|
| mkr4.3870733  | 0.5915 | 0.7433 | -0.0099 | 0.6904 |
| mkr4.402644   | 0.7077 | 0.8289 | -0.0885 | 0.8245 |
| mkr4.4106993  | 1      | 1      | NaN     | 1      |
| mkr4.4449112  | 0.5922 | 0.7439 | -0.0411 | 0.6906 |
| mkr4.4449231  | 0.6465 | 0.7853 | -0.242  | 0.7465 |
| mkr4.4762465  | 0.8792 | 0.9357 | -0.0371 | 0.9335 |
| mkr4.4952430  | 1      | 1      | NaN     | 1      |
| mkr4.5194468  | 0.8503 | 0.9191 | -0.0595 | 0.9147 |
| mkr4.5307084  | 0.6865 | 0.8141 | 0.2984  | 0.7892 |
| mkr4.5915765  | 0.8028 | 0.8906 | 0.4621  | 0.8833 |
| mkr4.5915820  | 0.7664 | 0.8678 | 0.6399  | 0.8586 |
| mkr4.6484708  | 0.6271 | 0.7708 | -0.0907 | 0.7734 |
| mkr4.7232845  | 0.9445 | 0.9715 | -0.0008 | 0.9714 |
| mkr4.7482574  | 0.6271 | 0.7708 | -0.2667 | 0.7264 |
| mkr4.763972   | 0.8426 | 0.9146 | -0.064  | 0.9096 |
| mkr4.8326154  | 0.8716 | 0.9314 | -0.0415 | 0.9288 |
| mkr4.8504097  | 1      | 1      | NaN     | 1      |
| mkr4.8765196  | 0.8244 | 0.9037 | -0.0747 | 0.8973 |
| mkr4.9414847  | 0.6834 | 0.8119 | -0.2007 | 0.7824 |
| mkr40.1240012 | 1      | 1      | NaN     | 1      |
| mkr40.1355263 | 0.646  | 0.7849 | -0.1587 | 0.7675 |
| mkr40.1355279 | 0.8242 | 0.9036 | -0.0733 | 0.8973 |
| mkr40.166901  | 0.6149 | 0.7615 | -0.2762 | 0.7145 |
| mkr40.198139  | 0.8053 | 0.8922 | -0.0909 | 0.8835 |
| mkr40.2938997 | 1      | 1      | NaN     | 1      |
| mkr40.3022819 | 0.8257 | 0.9046 | -0.0181 | 0.9067 |
| mkr40.3266945 | 0.8975 | 0.946  | -0.0286 | 0.9445 |
| mkr40.3830869 | 1      | 1      | NaN     | 1      |
| mkr40.3987865 | 0.7221 | 0.8386 | -0.162  | 0.8173 |
| mkr40.4283073 | 1      | 1      | NaN     | 1      |
| mkr401.23855  | 0.7087 | 0.8295 | -0.1732 | 0.8057 |
| mkr405.149531 | 0.6609 | 0.7958 | -0.2244 | 0.761  |
| mkr409.83249  | 1      | 1      | NaN     | 1      |
| mkr409.83269  | 1      | 1      | NaN     | 1      |
| mkr41.1245393 | 0.9025 | 0.9488 | -0.027  | 0.9474 |
| mkr41.248320  | 1      | 1      | NaN     | 1      |
| mkr41.248454  | 0.95   | 0.9744 | 0       | 0.9744 |
| mkr41.2756600 | 1      | 1      | NaN     | 1      |
| mkr41.3669010 | 0.6463 | 0.7852 | -0.2414 | 0.7465 |
| mkr41.998350  | 0.83   | 0.9071 | 0.6527  | 0.9036 |
| mkr42.1119373 | 0.9474 | 0.973  | -0.0007 | 0.973  |
| mkr42.1183857 | 0.9377 | 0.9678 | -0.0026 | 0.9677 |

|               |        |        |         |        |
|---------------|--------|--------|---------|--------|
| mkr42.1772637 | 0.9474 | 0.973  | -0.0007 | 0.973  |
| mkr42.1772644 | 0.9474 | 0.973  | -0.0007 | 0.973  |
| mkr42.3015673 | 0.8119 | 0.8962 | 0.4648  | 0.8897 |
| mkr43.1093337 | 1      | 1      | NaN     | 1      |
| mkr43.240383  | 1      | 1      | NaN     | 1      |
| mkr43.2692209 | 0.9474 | 0.973  | -0.0007 | 0.973  |
| mkr43.2766603 | 0.9474 | 0.973  | 0       | 0.973  |
| mkr43.3112192 | 0.9    | 0.9474 | 1       | 0.9474 |
| mkr43.3332442 | 0.8141 | 0.8975 | -0.0843 | 0.8898 |
| mkr43.3635635 | 1      | 1      | NaN     | 1      |
| mkr43.365663  | 0.6741 | 0.8053 | 0.3278  | 0.8111 |
| mkr43.4222680 | 1      | 1      | NaN     | 1      |
| mkr43.4282131 | 1      | 1      | NaN     | 1      |
| mkr43.4282208 | 1      | 1      | NaN     | 1      |
| mkr43.603556  | 0.8503 | 0.9191 | -0.0595 | 0.9147 |
| mkr431.103488 | 1      | 1      | NaN     | 1      |
| mkr44.2763411 | 1      | 1      | NaN     | 1      |
| mkr44.2781042 | 1      | 1      | NaN     | 1      |
| mkr44.3044568 | 1      | 1      | NaN     | 1      |
| mkr44.338914  | 1      | 1      | NaN     | 1      |
| mkr45.1266929 | 0.8143 | 0.8977 | -0.0857 | 0.8899 |
| mkr45.129073  | 1      | 1      | NaN     | 1      |
| mkr45.129117  | 1      | 1      | NaN     | 1      |
| mkr45.182941  | 0.8921 | 0.943  | -0.0318 | 0.9413 |
| mkr45.2425134 | 1      | 1      | NaN     | 1      |
| mkr45.306233  | 0.9474 | 0.973  | 0       | 0.973  |
| mkr45.3822407 | 1      | 1      | NaN     | 1      |
| mkr45.384983  | 1      | 1      | NaN     | 1      |
| mkr45.50973   | 1      | 1      | NaN     | 1      |
| mkr45.575671  | 1      | 1      | NaN     | 1      |
| mkr45.729059  | 1      | 1      | NaN     | 1      |
| mkr45.78615   | 1      | 1      | NaN     | 1      |
| mkr450.100709 | 0.6898 | 0.8164 | -0.1841 | 0.7897 |
| mkr450.101466 | 1      | 1      | NaN     | 1      |
| mkr452.37855  | 1      | 1      | NaN     | 1      |
| mkr46.1034573 | 0.95   | 0.9743 | 0.0007  | 0.9744 |
| mkr46.124509  | 0.7348 | 0.8472 | 0.3232  | 0.8309 |
| mkr46.1475566 | 1      | 1      | NaN     | 1      |
| mkr46.1675007 | 0.8052 | 0.8921 | -0.0901 | 0.8835 |
| mkr46.2474767 | 0.6785 | 0.8084 | 0.4948  | 0.7817 |
| mkr46.2485898 | 1      | 1      | NaN     | 1      |
| mkr46.2740192 | 1      | 1      | NaN     | 1      |

|               |        |        |         |        |
|---------------|--------|--------|---------|--------|
| mkr46.2805463 | 1      | 1      | NaN     | 1      |
| mkr46.2822294 | 1      | 1      | NaN     | 1      |
| mkr46.2937800 | 0.9474 | 0.973  | 0       | 0.973  |
| mkr46.2937896 | 0.9473 | 0.973  | 0.0008  | 0.973  |
| mkr46.3109816 | 0.7956 | 0.8862 | -0.0982 | 0.8764 |
| mkr46.3431602 | 0.6081 | 0.7563 | 0.0095  | 0.709  |
| mkr46.3696681 | 0.95   | 0.9744 | 0       | 0.9744 |
| mkr46.629601  | 0.7733 | 0.8722 | -0.1176 | 0.8593 |
| mkr46.746061  | 1      | 1      | NaN     | 1      |
| mkr465.16200  | 1      | 1      | NaN     | 1      |
| mkr47.1031210 | 0.863  | 0.9264 | -0.0457 | 0.9233 |
| mkr47.1610853 | 1      | 1      | NaN     | 1      |
| mkr47.177665  | 1      | 1      | NaN     | 1      |
| mkr47.222840  | 0.9025 | 0.9488 | -0.027  | 0.9474 |
| mkr47.2659471 | 0.6969 | 0.8214 | -0.1875 | 0.7948 |
| mkr47.3312799 | 1      | 1      | NaN     | 1      |
| mkr47.3353821 | 1      | 1      | NaN     | 1      |
| mkr47.4289538 | 1      | 1      | NaN     | 1      |
| mkr47.657943  | 0.9474 | 0.973  | 0       | 0.973  |
| mkr47.718092  | 0.8573 | 0.9232 | -0.0556 | 0.9193 |
| mkr47.789753  | 0.8143 | 0.8977 | -0.0857 | 0.8899 |
| mkr47.983640  | 0.7196 | 0.8369 | 0.2334  | 0.817  |
| mkr48.1191539 | 1      | 1      | NaN     | 1      |
| mkr48.1191554 | 1      | 1      | NaN     | 1      |
| mkr48.1350505 | 0.8503 | 0.9191 | -0.0595 | 0.9147 |
| mkr48.1674459 | 0.9499 | 0.9743 | 0.0015  | 0.9744 |
| mkr48.1773675 | 0.7507 | 0.8576 | -0.0445 | 0.8603 |
| mkr48.17981   | 1      | 1      | NaN     | 1      |
| mkr48.1847962 | 0.9474 | 0.973  | -0.0007 | 0.973  |
| mkr48.1901687 | 1      | 1      | NaN     | 1      |
| mkr48.1911224 | 1      | 1      | NaN     | 1      |
| mkr48.1911270 | 0.95   | 0.9744 | 0       | 0.9744 |
| mkr48.2013983 | 1      | 1      | NaN     | 1      |
| mkr48.2549656 | 0.8975 | 0.946  | -0.0286 | 0.9445 |
| mkr48.2559819 | 1      | 1      | NaN     | 1      |
| mkr48.2840632 | 1      | 1      | NaN     | 1      |
| mkr48.3177201 | 1      | 1      | NaN     | 1      |
| mkr48.3183530 | 0.9474 | 0.973  | -0.0007 | 0.973  |
| mkr48.3226245 | 1      | 1      | NaN     | 1      |
| mkr48.3281710 | 1      | 1      | NaN     | 1      |
| mkr48.3564881 | 0.9499 | 0.9743 | 0.0023  | 0.9744 |
| mkr48.3800164 | 1      | 1      | NaN     | 1      |

|               |        |        |         |        |
|---------------|--------|--------|---------|--------|
| mkr48.751108  | 1      | 1      | NaN     | 1      |
| mkr48.972966  | 1      | 1      | NaN     | 1      |
| mkr49.1116440 | 0.8999 | 0.9473 | 1       | 0.9474 |
| mkr49.1488593 | 0.8976 | 0.946  | -0.0293 | 0.9445 |
| mkr49.173490  | 1      | 1      | NaN     | 1      |
| mkr49.1818498 | 0.7342 | 0.8467 | -0.1515 | 0.8275 |
| mkr49.2173492 | 0.7341 | 0.8467 | -0.1508 | 0.8275 |
| mkr49.251957  | 0.95   | 0.9743 | 0.0007  | 0.9744 |
| mkr49.273340  | 1      | 1      | NaN     | 1      |
| mkr49.28496   | 0.7733 | 0.8722 | -0.1176 | 0.8593 |
| mkr49.3337614 | 0.6303 | 0.7732 | -0.26   | 0.7302 |
| mkr49.3403027 | 0.6782 | 0.8082 | 0.4953  | 0.7816 |
| mkr49.3492002 | 1      | 1      | NaN     | 1      |
| mkr49.381280  | 1      | 1      | NaN     | 1      |
| mkr49.382448  | 1      | 1      | NaN     | 1      |
| mkr49.4071436 | 1      | 1      | NaN     | 1      |
| mkr49.4082148 | 1      | 1      | NaN     | 1      |
| mkr49.4082180 | 1      | 1      | NaN     | 1      |
| mkr5.10123596 | 1      | 1      | NaN     | 1      |
| mkr5.10531264 | 0.8975 | 0.946  | 0       | 0.9473 |
| mkr5.1053255  | 1      | 1      | NaN     | 1      |
| mkr5.10544702 | 0.6913 | 0.8175 | 0.2173  | 0.7923 |
| mkr5.10949892 | 0.666  | 0.7995 | 0.14    | 0.7681 |
| mkr5.10994718 | 0.6093 | 0.7572 | 0.0495  | 0.7111 |
| mkr5.10994760 | 1      | 1      | NaN     | 1      |
| mkr5.11105681 | 1      | 1      | NaN     | 1      |
| mkr5.11506904 | 1      | 1      | NaN     | 1      |
| mkr5.11598727 | 0.9445 | 0.9715 | -0.0008 | 0.9714 |
| mkr5.1608015  | 0.95   | 0.9744 | 0       | 0.9744 |
| mkr5.2228965  | 0.6271 | 0.7708 | -0.2667 | 0.7264 |
| mkr5.3628417  | 1      | 1      | NaN     | 1      |
| mkr5.3628458  | 1      | 1      | NaN     | 1      |
| mkr5.381818   | 1      | 1      | NaN     | 1      |
| mkr5.442891   | 0.95   | 0.9744 | 0       | 0.9744 |
| mkr5.7276342  | 0.95   | 0.9744 | 0       | 0.9744 |
| mkr5.7621500  | 0.8502 | 0.919  | -0.0173 | 0.9203 |
| mkr5.813411   | 0.6303 | 0.7732 | -0.26   | 0.7302 |
| mkr5.8328733  | 1      | 1      | NaN     | 1      |
| mkr5.8358646  | 0.6597 | 0.795  | -0.1447 | 0.7798 |
| mkr5.897770   | 0.95   | 0.9743 | 0.0007  | 0.9744 |
| mkr50.1085490 | 0.7196 | 0.8369 | 0.2334  | 0.817  |
| mkr50.1678885 | 0.7342 | 0.8467 | -0.1515 | 0.8275 |

|               |        |        |         |        |
|---------------|--------|--------|---------|--------|
| mkr50.2376745 | 0.8054 | 0.8922 | -0.0916 | 0.8835 |
| mkr50.2814485 | 1      | 1      | NaN     | 1      |
| mkr50.3479555 | 1      | 1      | NaN     | 1      |
| mkr50.3773542 | 1      | 1      | NaN     | 1      |
| mkr50.3773664 | 0.9474 | 0.973  | 0       | 0.973  |
| mkr50.379165  | 0.6276 | 0.7712 | 0.0634  | 0.7297 |
| mkr50.379206  | 0.6276 | 0.7712 | 0.0634  | 0.7297 |
| mkr50.755956  | 1      | 1      | NaN     | 1      |
| mkr507.2899   | 0.9375 | 0.9677 | 0       | 0.9677 |
| mkr51.2380514 | 1      | 1      | NaN     | 1      |
| mkr51.3360358 | 0.7956 | 0.8862 | -0.0982 | 0.8764 |
| mkr51.3484585 | 1      | 1      | NaN     | 1      |
| mkr51.3484640 | 0.6496 | 0.7876 | 0.1281  | 0.7523 |
| mkr51.3901574 | 1      | 1      | NaN     | 1      |
| mkr51.3901580 | 1      | 1      | NaN     | 1      |
| mkr51.577957  | 0.8891 | 0.9413 | 0       | 0.9428 |
| mkr517.60293  | 1      | 1      | NaN     | 1      |
| mkr519.22266  | 1      | 1      | NaN     | 1      |
| mkr519.59401  | 0.8758 | 0.9338 | 1       | 0.9334 |
| mkr52.1061135 | 0.9444 | 0.9714 | 0.0009  | 0.9714 |
| mkr52.1095381 | 0.7083 | 0.8292 | -0.1006 | 0.8222 |
| mkr52.2028519 | 1      | 1      | NaN     | 1      |
| mkr52.2131378 | 0.9474 | 0.973  | 0       | 0.973  |
| mkr52.2782127 | 1      | 1      | NaN     | 1      |
| mkr52.3743243 | 0.7317 | 0.8451 | 0.2407  | 0.8273 |
| mkr52.3773545 | 0.95   | 0.9744 | 0       | 0.9744 |
| mkr52.671011  | 0.6278 | 0.7714 | 0.0628  | 0.7297 |
| mkr52.904299  | 0.751  | 0.8578 | -0.1341 | 0.8417 |
| mkr53.1793971 | 1      | 1      | NaN     | 1      |
| mkr53.689240  | 0.9474 | 0.973  | 0       | 0.973  |
| mkr54.1101286 | 1      | 1      | NaN     | 1      |
| mkr54.1436042 | 0.6609 | 0.7958 | -0.2244 | 0.761  |
| mkr54.182037  | 0.9474 | 0.973  | 0       | 0.973  |
| mkr54.1936550 | 1      | 1      | NaN     | 1      |
| mkr54.2192979 | 0.6463 | 0.7852 | -0.2414 | 0.7465 |
| mkr54.3141932 | 1      | 1      | NaN     | 1      |
| mkr54.3295135 | 1      | 1      | NaN     | 1      |
| mkr54.3306346 | 0.9445 | 0.9715 | -0.0015 | 0.9714 |
| mkr54.3551926 | 0.9474 | 0.973  | -0.0007 | 0.973  |
| mkr54.3551966 | 1      | 1      | NaN     | 1      |
| mkr54.3625582 | 0.671  | 0.8031 | -0.1351 | 0.79   |
| mkr54.3636111 | 1      | 1      | NaN     | 1      |



|               |        |        |         |        |
|---------------|--------|--------|---------|--------|
| mkr54.3636188 | 1      | 1      | NaN     | 1      |
| mkr54.570205  | 1      | 1      | NaN     | 1      |
| mkr54.931604  | 0.7627 | 0.8654 | -0.1257 | 0.851  |
| mkr55.1047278 | 1      | 1      | NaN     | 1      |
| mkr55.1081089 | 0.722  | 0.8385 | -0.1613 | 0.8173 |
| mkr55.1081112 | 0.6486 | 0.7869 | -0.1603 | 0.7689 |
| mkr55.2416240 | 0.6744 | 0.8056 | 0.2088  | 0.7773 |
| mkr55.2488535 | 0.8716 | 0.9314 | -0.0415 | 0.9288 |
| mkr55.2488581 | 0.6834 | 0.8119 | -0.2007 | 0.7824 |
| mkr55.2584759 | 0.6685 | 0.8013 | -0.215  | 0.7685 |
| mkr55.2865395 | 1      | 1      | NaN     | 1      |
| mkr55.3586897 | 0.6936 | 0.8191 | -0.1842 | 0.7926 |
| mkr55.870207  | 0.7085 | 0.8294 | -0.1724 | 0.8057 |
| mkr56.1032347 | 0.9474 | 0.973  | -0.0007 | 0.973  |
| mkr56.1032443 | 1      | 1      | NaN     | 1      |
| mkr56.104571  | 0.95   | 0.9743 | 0.0007  | 0.9744 |
| mkr56.182355  | 1      | 1      | NaN     | 1      |
| mkr56.1906444 | 0.7956 | 0.8862 | -0.0982 | 0.8764 |
| mkr56.1906513 | 0.8054 | 0.8922 | -0.0916 | 0.8835 |
| mkr56.1906550 | 0.8503 | 0.9191 | -0.0595 | 0.9147 |
| mkr56.2625708 | 1      | 1      | NaN     | 1      |
| mkr56.2928088 | 0.8425 | 0.9145 | -0.0633 | 0.9096 |
| mkr56.3640997 | 0.95   | 0.9744 | 0       | 0.9744 |
| mkr56.3784468 | 0.95   | 0.9744 | 0       | 0.9744 |
| mkr56.3795734 | 1      | 1      | NaN     | 1      |
| mkr56.604942  | 1      | 1      | NaN     | 1      |
| mkr56.604950  | 1      | 1      | NaN     | 1      |
| mkr56.699433  | 1      | 1      | NaN     | 1      |
| mkr56.73579   | 0.8426 | 0.9146 | -0.064  | 0.9096 |
| mkr56.970976  | 1      | 1      | NaN     | 1      |
| mkr57.144379  | 1      | 1      | NaN     | 1      |
| mkr57.161856  | 1      | 1      | NaN     | 1      |
| mkr57.1869747 | 1      | 1      | NaN     | 1      |
| mkr57.233940  | 0.6525 | 0.7897 | -0.233  | 0.7528 |
| mkr57.2440332 | 1      | 1      | NaN     | 1      |
| mkr57.2668673 | 1      | 1      | NaN     | 1      |
| mkr57.2736955 | 1      | 1      | NaN     | 1      |
| mkr57.3236696 | 1      | 1      | NaN     | 1      |
| mkr57.3236705 | 1      | 1      | NaN     | 1      |
| mkr57.3356149 | 0.6305 | 0.7734 | -0.2606 | 0.7302 |
| mkr57.3584400 | 1      | 1      | NaN     | 1      |
| mkr57.3833933 | 0.6346 | 0.7764 | -0.2525 | 0.735  |

|               |        |        |         |        |
|---------------|--------|--------|---------|--------|
| mkr57.756810  | 0.9444 | 0.9714 | 0.0009  | 0.9714 |
| mkr58.103618  | 0.9445 | 0.9715 | -0.0015 | 0.9714 |
| mkr58.1097399 | 0.6969 | 0.8214 | -0.1875 | 0.7948 |
| mkr58.1098231 | 0.95   | 0.9744 | 0       | 0.9744 |
| mkr58.1211818 | 0.95   | 0.9744 | 0       | 0.9744 |
| mkr58.1415442 | 1      | 1      | NaN     | 1      |
| mkr58.1581648 | 0.771  | 0.8707 | 0.3372  | 0.8591 |
| mkr58.165621  | 0.8452 | 0.9161 | -0.0189 | 0.9174 |
| mkr58.165782  | 1      | 1      | NaN     | 1      |
| mkr58.2246722 | 0.8861 | 0.9396 | -0.0346 | 0.9376 |
| mkr58.2254002 | 0.8975 | 0.946  | -0.0286 | 0.9445 |
| mkr58.2403998 | 0.6834 | 0.8119 | -0.2007 | 0.7824 |
| mkr58.2468148 | 0.8503 | 0.9191 | -0.0595 | 0.9147 |
| mkr58.2516712 | 1      | 1      | NaN     | 1      |
| mkr58.2592987 | 0.8142 | 0.8976 | -0.085  | 0.8898 |
| mkr58.3232505 | 0.8549 | 0.9218 | 0.6545  | 0.9191 |
| mkr58.3249277 | 0.8408 | 0.9135 | -0.0508 | 0.9095 |
| mkr58.3313327 | 0.7626 | 0.8653 | -0.125  | 0.851  |
| mkr58.3313334 | 0.7732 | 0.8721 | -0.117  | 0.8592 |
| mkr58.335065  | 0.95   | 0.9743 | 0.0007  | 0.9744 |
| mkr58.3591142 | 1      | 1      | NaN     | 1      |
| mkr58.3664416 | 0.9474 | 0.973  | -0.0007 | 0.973  |
| mkr58.3664488 | 0.9377 | 0.9678 | -0.0033 | 0.9677 |
| mkr58.418813  | 1      | 1      | NaN     | 1      |
| mkr58.418861  | 1      | 1      | NaN     | 1      |
| mkr58.56160   | 0.8861 | 0.9396 | -0.0346 | 0.9376 |
| mkr58.616274  | 0.8339 | 0.9094 | -0.0683 | 0.9038 |
| mkr58.762343  | 0.7956 | 0.8862 | -0.0982 | 0.8764 |
| mkr58.961373  | 0.95   | 0.9744 | 0       | 0.9744 |
| mkr59.1052252 | 1      | 1      | NaN     | 1      |
| mkr59.2271395 | 1      | 1      | NaN     | 1      |
| mkr59.3219508 | 0.6346 | 0.7764 | -0.2525 | 0.735  |
| mkr592.37147  | 1      | 1      | NaN     | 1      |
| mkr6.10282678 | 1      | 1      | NaN     | 1      |
| mkr6.10282699 | 1      | 1      | NaN     | 1      |
| mkr6.10282717 | 0.9001 | 0.9474 | 0       | 0.9487 |
| mkr6.1621678  | 0.95   | 0.9744 | 0       | 0.9744 |
| mkr6.2183722  | 1      | 1      | NaN     | 1      |
| mkr6.2366313  | 0.9474 | 0.973  | -0.0007 | 0.973  |
| mkr6.2421590  | 1      | 1      | NaN     | 1      |
| mkr6.2501428  | 0.9001 | 0.9474 | 0       | 0.9487 |
| mkr6.3446185  | 1      | 1      | NaN     | 1      |

|               |        |        |         |        |
|---------------|--------|--------|---------|--------|
| mkr6.4465297  | 1      | 1      | NaN     | 1      |
| mkr6.4874331  | 0.8947 | 0.9444 | 1       | 0.9444 |
| mkr6.553730   | 0.8572 | 0.9231 | -0.0549 | 0.9193 |
| mkr6.6094544  | 0.8054 | 0.8922 | -0.0916 | 0.8835 |
| mkr6.7333505  | 0.9474 | 0.973  | 0       | 0.973  |
| mkr6.904096   | 1      | 1      | NaN     | 1      |
| mkr6.905417   | 0.9025 | 0.9488 | -0.027  | 0.9474 |
| mkr6.9116267  | 0.9413 | 0.9698 | -0.0023 | 0.9697 |
| mkr6.9610135  | 1      | 1      | NaN     | 1      |
| mkr6.9719709  | 0.9474 | 0.973  | -0.0007 | 0.973  |
| mkr60.1069884 | 1      | 1      | NaN     | 1      |
| mkr60.1756320 | 1      | 1      | NaN     | 1      |
| mkr60.2428230 | 0.8424 | 0.9144 | -0.0625 | 0.9096 |
| mkr60.3444584 | 1      | 1      | NaN     | 1      |
| mkr60.3509278 | 1      | 1      | NaN     | 1      |
| mkr60.3518368 | 1      | 1      | NaN     | 1      |
| mkr60.3623148 | 1      | 1      | NaN     | 1      |
| mkr60.3623166 | 1      | 1      | NaN     | 1      |
| mkr60.3623358 | 0.6778 | 0.808  | -0.2018 | 0.7778 |
| mkr60.3703773 | 0.6134 | 0.7604 | 0.1654  | 0.7171 |
| mkr61.1325160 | 1      | 1      | NaN     | 1      |
| mkr61.1401506 | 0.6271 | 0.7708 | -0.2467 | 0.7296 |
| mkr61.1872653 | 1      | 1      | NaN     | 1      |
| mkr61.2332590 | 0.722  | 0.8385 | -0.1613 | 0.8173 |
| mkr61.3106075 | 1      | 1      | NaN     | 1      |
| mkr61.3236042 | 0.6269 | 0.7707 | -0.266  | 0.7264 |
| mkr61.3378119 | 0.8244 | 0.9037 | -0.0747 | 0.8973 |
| mkr611.9436   | 0.8606 | 0.9251 | -0.0264 | 0.9232 |
| mkr62.1058916 | 1      | 1      | NaN     | 1      |
| mkr62.1331074 | 1      | 1      | NaN     | 1      |
| mkr62.2167665 | 0.95   | 0.9744 | 0       | 0.9744 |
| mkr62.2721053 | 0.9474 | 0.973  | -0.0007 | 0.973  |
| mkr62.3129666 | 1      | 1      | NaN     | 1      |
| mkr62.3129672 | 1      | 1      | NaN     | 1      |
| mkr62.3585952 | 0.6911 | 0.8173 | 0.2179  | 0.7923 |
| mkr63.1204795 | 1      | 1      | NaN     | 1      |
| mkr63.1257652 | 0.8503 | 0.9191 | -0.0595 | 0.9147 |
| mkr63.1339096 | 0.886  | 0.9395 | -0.0339 | 0.9376 |
| mkr63.1367818 | 0.9474 | 0.973  | -0.0007 | 0.973  |
| mkr63.1799720 | 1      | 1      | NaN     | 1      |
| mkr63.2190175 | 0.9474 | 0.973  | 0       | 0.973  |
| mkr63.2320816 | 0.8921 | 0.943  | -0.0318 | 0.9413 |

|               |        |        |         |        |
|---------------|--------|--------|---------|--------|
| mkr63.2605777 | 0.5939 | 0.7452 | -0.3084 | 0.6909 |
| mkr63.3292348 | 0.8503 | 0.9191 | -0.0595 | 0.9147 |
| mkr63.3326512 | 0.8143 | 0.8977 | -0.0857 | 0.8899 |
| mkr63.3377071 | 1      | 1      | NaN     | 1      |
| mkr63.534142  | 1      | 1      | NaN     | 1      |
| mkr631.12440  | 1      | 1      | NaN     | 1      |
| mkr633.16114  | 1      | 1      | NaN     | 1      |
| mkr64.1270226 | 1      | 1      | NaN     | 1      |
| mkr64.148136  | 0.95   | 0.9744 | 0       | 0.9744 |
| mkr64.267574  | 0.7351 | 0.8473 | 0.3225  | 0.8309 |
| mkr64.3009140 | 0.95   | 0.9743 | 0.0007  | 0.9744 |
| mkr64.3024594 | 0.8052 | 0.8921 | -0.0901 | 0.8835 |
| mkr641.20159  | 1      | 1      | NaN     | 1      |
| mkr65.1912938 | 0.8143 | 0.8977 | -0.0857 | 0.8899 |
| mkr65.2569667 | 0.6969 | 0.8214 | -0.1875 | 0.7948 |
| mkr65.3409293 | 1      | 1      | NaN     | 1      |
| mkr65.341179  | 1      | 1      | NaN     | 1      |
| mkr66.2010471 | 1      | 1      | NaN     | 1      |
| mkr66.2072542 | 0.8502 | 0.919  | -0.0173 | 0.9203 |
| mkr66.2290768 | 0.7221 | 0.8386 | -0.162  | 0.8173 |
| mkr66.2920398 | 1      | 1      | NaN     | 1      |
| mkr66.2963699 | 0.8503 | 0.9191 | -0.0595 | 0.9147 |
| mkr66.2963730 | 0.9474 | 0.973  | -0.0007 | 0.973  |
| mkr66.3046857 | 1      | 1      | NaN     | 1      |
| mkr66.749462  | 0.95   | 0.9744 | 0       | 0.9744 |
| mkr67.1527175 | 0.7956 | 0.8862 | -0.0982 | 0.8764 |
| mkr67.1879956 | 1      | 1      | NaN     | 1      |
| mkr67.2028766 | 1      | 1      | NaN     | 1      |
| mkr67.240720  | 0.8053 | 0.8922 | -0.0909 | 0.8835 |
| mkr67.2461997 | 1      | 1      | NaN     | 1      |
| mkr67.2877725 | 0.8479 | 0.9177 | -0.0194 | 0.9188 |
| mkr67.2910953 | 1      | 1      | NaN     | 1      |
| mkr67.29218   | 0.8426 | 0.9146 | -0.064  | 0.9096 |
| mkr67.29225   | 0.8426 | 0.9146 | -0.064  | 0.9096 |
| mkr67.85214   | 0.7082 | 0.8292 | -0.171  | 0.8057 |
| mkr67.85386   | 0.9474 | 0.973  | -0.0007 | 0.973  |
| mkr67.85458   | 0.9474 | 0.973  | -0.0007 | 0.973  |
| mkr67.944408  | 0.95   | 0.9744 | 0       | 0.9744 |
| mkr68.1310248 | 1      | 1      | NaN     | 1      |
| mkr68.1322642 | 0.95   | 0.9744 | 0       | 0.9744 |
| mkr68.1337477 | 1      | 1      | NaN     | 1      |
| mkr68.1754015 | 1      | 1      | NaN     | 1      |

|               |        |        |         |        |
|---------------|--------|--------|---------|--------|
| mkr68.1754038 | 1      | 1      | NaN     | 1      |
| mkr68.182758  | 1      | 1      | NaN     | 1      |
| mkr68.2675538 | 0.7197 | 0.837  | 0.3182  | 0.8188 |
| mkr68.613688  | 0.95   | 0.9743 | 0.0007  | 0.9744 |
| mkr68.734068  | 1      | 1      | NaN     | 1      |
| mkr68.739847  | 0.6111 | 0.7586 | -0.2857 | 0.7097 |
| mkr69.207005  | 0.5931 | 0.7446 | -0.3052 | 0.6908 |
| mkr69.2176681 | 1      | 1      | NaN     | 1      |
| mkr69.2176713 | 1      | 1      | NaN     | 1      |
| mkr69.397598  | 1      | 1      | NaN     | 1      |
| mkr69.582575  | 1      | 1      | NaN     | 1      |
| mkr69.740857  | 0.6245 | 0.7688 | -0.0989 | 0.7699 |
| mkr69.84822   | 0.7319 | 0.8452 | 0.24    | 0.8273 |
| mkr69.976249  | 0.7342 | 0.8467 | -0.1515 | 0.8275 |
| mkr69.976586  | 1      | 1      | NaN     | 1      |
| mkr7.1075771  | 0.6072 | 0.7556 | 0.3705  | 0.7106 |
| mkr7.1118266  | 1      | 1      | NaN     | 1      |
| mkr7.116486   | 0.9474 | 0.973  | -0.0007 | 0.973  |
| mkr7.116522   | 0.9474 | 0.973  | 0       | 0.973  |
| mkr7.2604350  | 0.8976 | 0.946  | -0.0293 | 0.9445 |
| mkr7.2625922  | 0.8861 | 0.9396 | -0.0346 | 0.9376 |
| mkr7.3954257  | 0.9474 | 0.973  | 0       | 0.973  |
| mkr7.3954266  | 0.95   | 0.9743 | 0.0007  | 0.9744 |
| mkr7.4421611  | 1      | 1      | NaN     | 1      |
| mkr7.4421711  | 0.6611 | 0.7959 | -0.2251 | 0.761  |
| mkr7.5225703  | 0.6831 | 0.8117 | -0.1993 | 0.7824 |
| mkr7.5245707  | 1      | 1      | NaN     | 1      |
| mkr7.5529685  | 0.7733 | 0.8722 | -0.1176 | 0.8593 |
| mkr7.5730200  | 0.6278 | 0.7714 | 0.0628  | 0.7297 |
| mkr7.5907681  | 1      | 1      | NaN     | 1      |
| mkr7.6295430  | 0.8054 | 0.8922 | -0.0916 | 0.8835 |
| mkr7.652131   | 0.6781 | 0.8082 | -0.2032 | 0.7779 |
| mkr7.6714679  | 0.95   | 0.9744 | 0       | 0.9744 |
| mkr7.6781477  | 0.95   | 0.9743 | 0.0007  | 0.9744 |
| mkr7.6822106  | 1      | 1      | NaN     | 1      |
| mkr7.774743   | 1      | 1      | NaN     | 1      |
| mkr7.9063372  | 1      | 1      | NaN     | 1      |
| mkr7.967062   | 0.7221 | 0.8386 | -0.162  | 0.8173 |
| mkr7.967103   | 0.7342 | 0.8467 | -0.1515 | 0.8275 |
| mkr7.9757781  | 0.8028 | 0.8906 | 0.4621  | 0.8833 |
| mkr70.161095  | 1      | 1      | NaN     | 1      |
| mkr70.2036782 | 0.9    | 0.9474 | 1       | 0.9474 |

|               |        |        |         |        |
|---------------|--------|--------|---------|--------|
| mkr70.2039436 | 1      | 1      | NaN     | 1      |
| mkr70.2176467 | 0.95   | 0.9743 | 0.0007  | 0.9744 |
| mkr70.264614  | 0.9474 | 0.973  | -0.0007 | 0.973  |
| mkr70.279882  | 1      | 1      | NaN     | 1      |
| mkr70.463069  | 1      | 1      | NaN     | 1      |
| mkr71.1355563 | 0.9474 | 0.973  | -0.0007 | 0.973  |
| mkr71.1392891 | 0.9024 | 0.9487 | -0.0256 | 0.9474 |
| mkr71.1392927 | 0.8361 | 0.9107 | 1       | 0.9092 |
| mkr71.2453154 | 1      | 1      | NaN     | 1      |
| mkr71.2498371 | 1      | 1      | NaN     | 1      |
| mkr71.3028150 | 1      | 1      | NaN     | 1      |
| mkr71.3083941 | 0.9473 | 0.973  | 0.0008  | 0.973  |
| mkr71.3083949 | 0.8949 | 0.9445 | 0       | 0.9459 |
| mkr71.709798  | 1      | 1      | NaN     | 1      |
| mkr71.709824  | 1      | 1      | NaN     | 1      |
| mkr71.8341    | 0.9001 | 0.9474 | 0       | 0.9487 |
| mkr71.849797  | 1      | 1      | NaN     | 1      |
| mkr711.4266   | 0.8914 | 0.9426 | -0.0002 | 0.944  |
| mkr719.12757  | 1      | 1      | NaN     | 1      |
| mkr72.1003388 | 1      | 1      | NaN     | 1      |
| mkr72.1651325 | 1      | 1      | NaN     | 1      |
| mkr72.2002464 | 1      | 1      | NaN     | 1      |
| mkr72.2083513 | 0.6088 | 0.7569 | 0.0072  | 0.7092 |
| mkr72.2090070 | 0.8119 | 0.8962 | 0.4648  | 0.8897 |
| mkr72.2149979 | 0.6525 | 0.7897 | -0.233  | 0.7528 |
| mkr72.2150012 | 0.6781 | 0.8082 | -0.2032 | 0.7779 |
| mkr72.2731009 | 0.7954 | 0.886  | -0.0968 | 0.8764 |
| mkr73.2600606 | 0.8054 | 0.8922 | -0.0916 | 0.8835 |
| mkr73.2744889 | 0.8946 | 0.9444 | -0.0001 | 0.9457 |
| mkr73.3069070 | 0.9445 | 0.9715 | -0.0008 | 0.9714 |
| mkr73.3172535 | 0.8976 | 0.946  | -0.0293 | 0.9445 |
| mkr73.541585  | 0.9001 | 0.9474 | 0       | 0.9487 |
| mkr74.1700086 | 1      | 1      | NaN     | 1      |
| mkr74.2002180 | 1      | 1      | NaN     | 1      |
| mkr74.2773758 | 0.8975 | 0.946  | 0       | 0.9473 |
| mkr74.2785929 | 1      | 1      | NaN     | 1      |
| mkr74.739704  | 1      | 1      | NaN     | 1      |
| mkr744.545    | 0.8663 | 0.9284 | 1       | 0.9286 |
| mkr75.1534899 | 0.6943 | 0.8195 | -0.1874 | 0.7927 |
| mkr75.1534921 | 0.6465 | 0.7853 | -0.242  | 0.7465 |
| mkr75.1577005 | 0.8949 | 0.9445 | 0       | 0.9459 |
| mkr75.1691681 | 1      | 1      | NaN     | 1      |

|               |        |        |         |        |
|---------------|--------|--------|---------|--------|
| mkr75.1746024 | 0.95   | 0.9744 | 0       | 0.9744 |
| mkr75.3108715 | 0.8425 | 0.9145 | -0.0633 | 0.9096 |
| mkr75.3142983 | 1      | 1      | NaN     | 1      |
| mkr75.39408   | 0.6465 | 0.7853 | -0.242  | 0.7465 |
| mkr75.39593   | 0.5944 | 0.7456 | -0.3103 | 0.6911 |
| mkr75.397315  | 0.7032 | 0.8257 | 0.6175  | 0.805  |
| mkr75.952135  | 0.7627 | 0.8654 | -0.1257 | 0.851  |
| mkr75.952338  | 0.7323 | 0.8455 | 0.7769  | 0.8306 |
| mkr76.2151896 | 0.95   | 0.9744 | 0       | 0.9744 |
| mkr76.2833040 | 0.6936 | 0.8191 | -0.1842 | 0.7926 |
| mkr76.578829  | 0.7081 | 0.8291 | -0.1703 | 0.8057 |
| mkr76.584771  | 0.6905 | 0.8169 | -0.1874 | 0.7898 |
| mkr76.627088  | 1      | 1      | NaN     | 1      |
| mkr764.12526  | 1      | 1      | NaN     | 1      |
| mkr77.1009058 | 0.8976 | 0.946  | -0.0293 | 0.9445 |
| mkr77.1978929 | 0.9444 | 0.9714 | 0       | 0.9714 |
| mkr77.2013045 | 0.9413 | 0.9698 | -0.0023 | 0.9697 |
| mkr77.2676871 | 0.95   | 0.9743 | 0.0007  | 0.9744 |
| mkr77.852384  | 1      | 1      | NaN     | 1      |
| mkr771.8120   | 0.7088 | 0.8296 | -0.1738 | 0.8058 |
| mkr774.1627   | 1      | 1      | NaN     | 1      |
| mkr78.1650993 | 1      | 1      | NaN     | 1      |
| mkr78.2233973 | 0.95   | 0.9744 | 0       | 0.9744 |
| mkr78.2289518 | 1      | 1      | NaN     | 1      |
| mkr78.2928755 | 0.9474 | 0.973  | -0.0007 | 0.973  |
| mkr78.3025028 | 0.9472 | 0.9729 | 0.0026  | 0.973  |
| mkr78.325023  | 0.95   | 0.9744 | 0       | 0.9744 |
| mkr78.325041  | 0.95   | 0.9744 | 0       | 0.9744 |
| mkr79.1192899 | 0.6633 | 0.7976 | 0.4889  | 0.7677 |
| mkr79.119540  | 0.6612 | 0.7961 | -0.2258 | 0.761  |
| mkr79.2111239 | 1      | 1      | NaN     | 1      |
| mkr79.2295538 | 0.7626 | 0.8653 | -0.125  | 0.851  |
| mkr79.2672431 | 1      | 1      | NaN     | 1      |
| mkr79.2672464 | 1      | 1      | NaN     | 1      |
| mkr79.2795339 | 0.9025 | 0.9488 | -0.027  | 0.9474 |
| mkr79.2863748 | 0.9445 | 0.9715 | -0.0015 | 0.9714 |
| mkr79.839946  | 1      | 1      | NaN     | 1      |
| mkr79.839951  | 1      | 1      | NaN     | 1      |
| mkr8.10440285 | 1      | 1      | NaN     | 1      |
| mkr8.10440329 | 1      | 1      | NaN     | 1      |
| mkr8.1816624  | 0.6305 | 0.7734 | -0.2606 | 0.7302 |
| mkr8.1850819  | 1      | 1      | NaN     | 1      |

|               |        |        |         |        |
|---------------|--------|--------|---------|--------|
| mkr8.1850865  | 1      | 1      | NaN     | 1      |
| mkr8.2995785  | 1      | 1      | NaN     | 1      |
| mkr8.3382587  | 1      | 1      | NaN     | 1      |
| mkr8.3687015  | 0.8136 | 0.8972 | -0.0813 | 0.8898 |
| mkr8.4146160  | 0.6465 | 0.7853 | -0.242  | 0.7465 |
| mkr8.426244   | 0.95   | 0.9744 | 0       | 0.9744 |
| mkr8.4383709  | 1      | 1      | NaN     | 1      |
| mkr8.4600666  | 1      | 1      | NaN     | 1      |
| mkr8.476905   | 1      | 1      | NaN     | 1      |
| mkr8.4914044  | 1      | 1      | NaN     | 1      |
| mkr8.533330   | 1      | 1      | NaN     | 1      |
| mkr8.6141741  | 0.9474 | 0.973  | -0.0007 | 0.973  |
| mkr8.623784   | 1      | 1      | NaN     | 1      |
| mkr8.6918693  | 1      | 1      | NaN     | 1      |
| mkr8.6918698  | 0.7443 | 0.8534 | 0.7799  | 0.841  |
| mkr8.6918800  | 1      | 1      | NaN     | 1      |
| mkr8.7981298  | 0.8097 | 0.8948 | 0.6478  | 0.8895 |
| mkr8.8164924  | 0.8827 | 0.9377 | 1       | 0.9375 |
| mkr8.8842204  | 0.5987 | 0.749  | -0.2108 | 0.7207 |
| mkr80.100119  | 0.95   | 0.9744 | 0       | 0.9744 |
| mkr80.1086135 | 0.8887 | 0.9411 | -0.0001 | 0.9426 |
| mkr80.2061639 | 0.95   | 0.9744 | 0       | 0.9744 |
| mkr80.2290796 | 0.95   | 0.9744 | 0       | 0.9744 |
| mkr80.2438796 | 1      | 1      | NaN     | 1      |
| mkr80.2580062 | 1      | 1      | NaN     | 1      |
| mkr80.2719146 | 0.8921 | 0.9429 | -0.0311 | 0.9413 |
| mkr80.2958406 | 1      | 1      | NaN     | 1      |
| mkr80.2964911 | 0.9001 | 0.9474 | 0       | 0.9487 |
| mkr80.429590  | 1      | 1      | NaN     | 1      |
| mkr80.683555  | 1      | 1      | NaN     | 1      |
| mkr80.726223  | 1      | 1      | NaN     | 1      |
| mkr80.917854  | 0.95   | 0.9743 | 0.0007  | 0.9744 |
| mkr81.1151786 | 1      | 1      | NaN     | 1      |
| mkr81.1208612 | 1      | 1      | NaN     | 1      |
| mkr81.1607889 | 1      | 1      | NaN     | 1      |
| mkr81.1881317 | 0.6459 | 0.7849 | -0.1601 | 0.7669 |
| mkr81.516147  | 1      | 1      | NaN     | 1      |
| mkr81.516156  | 1      | 1      | NaN     | 1      |
| mkr81.68979   | 1      | 1      | NaN     | 1      |
| mkr81.738949  | 1      | 1      | NaN     | 1      |
| mkr82.1205886 | 1      | 1      | NaN     | 1      |
| mkr82.1615069 | 1      | 1      | NaN     | 1      |



|               |        |        |         |        |
|---------------|--------|--------|---------|--------|
| mkr82.1822328 | 0.9474 | 0.973  | 0       | 0.973  |
| mkr82.1822377 | 0.678  | 0.8081 | -0.2025 | 0.7779 |
| mkr82.2223376 | 1      | 1      | NaN     | 1      |
| mkr83.1484354 | 1      | 1      | NaN     | 1      |
| mkr83.1876892 | 1      | 1      | NaN     | 1      |
| mkr83.2189683 | 1      | 1      | NaN     | 1      |
| mkr83.2752434 | 0.8502 | 0.919  | -0.0588 | 0.9147 |
| mkr83.361075  | 0.9474 | 0.973  | -0.0007 | 0.973  |
| mkr84.1255367 | 0.8503 | 0.9191 | -0.0595 | 0.9147 |
| mkr84.1673690 | 1      | 1      | NaN     | 1      |
| mkr84.178152  | 0.6248 | 0.7691 | 0.0221  | 0.726  |
| mkr84.1823503 | 1      | 1      | NaN     | 1      |
| mkr84.2400244 | 0.7956 | 0.8862 | -0.0982 | 0.8764 |
| mkr84.2526567 | 1      | 1      | NaN     | 1      |
| mkr84.414096  | 1      | 1      | NaN     | 1      |
| mkr84.541826  | 0.95   | 0.9744 | 0       | 0.9744 |
| mkr84.814645  | 0.9236 | 0.9603 | -0.0065 | 0.96   |
| mkr85.1190689 | 1      | 1      | NaN     | 1      |
| mkr85.1228749 | 0.5943 | 0.7455 | -0.3097 | 0.691  |
| mkr85.1231246 | 0.9336 | 0.9656 | -0.0037 | 0.9655 |
| mkr85.1277932 | 0.9473 | 0.9729 | 0.0016  | 0.973  |
| mkr85.1692021 | 0.95   | 0.9744 | 0       | 0.9744 |
| mkr85.1747922 | 1      | 1      | NaN     | 1      |
| mkr85.2794572 | 0.6781 | 0.8082 | -0.2032 | 0.7779 |
| mkr85.287973  | 0.7088 | 0.8296 | -0.1738 | 0.8058 |
| mkr85.304309  | 1      | 1      | NaN     | 1      |
| mkr85.478311  | 0.6248 | 0.7691 | 0.0221  | 0.726  |
| mkr85.712191  | 0.8528 | 0.9206 | -0.0179 | 0.9217 |
| mkr85.912276  | 1      | 1      | NaN     | 1      |
| mkr86.1212945 | 0.7082 | 0.8292 | -0.171  | 0.8057 |
| mkr86.1259674 | 0.95   | 0.9744 | 0       | 0.9744 |
| mkr86.1478524 | 0.8572 | 0.9231 | -0.0549 | 0.9193 |
| mkr86.1948588 | 1      | 1      | NaN     | 1      |
| mkr86.1960763 | 1      | 1      | NaN     | 1      |
| mkr86.2532107 | 1      | 1      | NaN     | 1      |
| mkr86.439100  | 0.5922 | 0.7439 | -0.0411 | 0.6906 |
| mkr86.77728   | 1      | 1      | NaN     | 1      |
| mkr87.1613021 | 0.834  | 0.9095 | -0.069  | 0.9038 |
| mkr87.1925432 | 0.5912 | 0.7431 | -0.0092 | 0.6903 |
| mkr87.2223571 | 0.9474 | 0.973  | -0.0007 | 0.973  |
| mkr87.2535251 | 1      | 1      | NaN     | 1      |
| mkr87.2779018 | 1      | 1      | NaN     | 1      |

|               |        |        |         |        |
|---------------|--------|--------|---------|--------|
| mkr87.464016  | 0.6347 | 0.7766 | -0.2531 | 0.735  |
| mkr88.1088680 | 0.8976 | 0.946  | -0.0293 | 0.9445 |
| mkr88.1089397 | 0.95   | 0.9744 | 0       | 0.9744 |
| mkr88.1431733 | 0.9474 | 0.973  | 0       | 0.973  |
| mkr88.2302395 | 1      | 1      | NaN     | 1      |
| mkr88.2483438 | 1      | 1      | NaN     | 1      |
| mkr88.2544384 | 0.7626 | 0.8653 | -0.125  | 0.851  |
| mkr88.487932  | 1      | 1      | NaN     | 1      |
| mkr88.928683  | 1      | 1      | NaN     | 1      |
| mkr89.1216511 | 0.6284 | 0.7718 | 0.4742  | 0.7338 |
| mkr89.171781  | 0.6086 | 0.7567 | 0.589   | 0.7161 |
| mkr89.1762493 | 1      | 1      | NaN     | 1      |
| mkr89.2721619 | 0.8573 | 0.9232 | -0.0556 | 0.9193 |
| mkr89.2810351 | 0.9474 | 0.973  | 0       | 0.973  |
| mkr89.39445   | 0.6941 | 0.8194 | -0.1868 | 0.7927 |
| mkr89.506532  | 0.95   | 0.9743 | 0.0007  | 0.9744 |
| mkr892.2207   | 1      | 1      | NaN     | 1      |
| mkr892.2326   | 1      | 1      | NaN     | 1      |
| mkr892.2346   | 1      | 1      | NaN     | 1      |
| mkr9.10175449 | 0.95   | 0.9744 | 0       | 0.9744 |
| mkr9.1045461  | 1      | 1      | NaN     | 1      |
| mkr9.1345658  | 1      | 1      | NaN     | 1      |
| mkr9.1550348  | 1      | 1      | NaN     | 1      |
| mkr9.2080971  | 0.95   | 0.9743 | 0.0007  | 0.9744 |
| mkr9.2404334  | 0.9474 | 0.973  | 0       | 0.973  |
| mkr9.2404344  | 0.9474 | 0.973  | 0       | 0.973  |
| mkr9.2651398  | 0.6611 | 0.7959 | -0.2251 | 0.761  |
| mkr9.3328967  | 0.6271 | 0.7708 | -0.2667 | 0.7264 |
| mkr9.4832819  | 0.95   | 0.9744 | 0       | 0.9744 |
| mkr9.4887331  | 1      | 1      | NaN     | 1      |
| mkr9.4999064  | 1      | 1      | NaN     | 1      |
| mkr9.5247892  | 0.8549 | 0.9218 | 0.6545  | 0.9191 |
| mkr9.52565    | 1      | 1      | NaN     | 1      |
| mkr9.5732160  | 1      | 1      | NaN     | 1      |
| mkr9.6193445  | 1      | 1      | NaN     | 1      |
| mkr9.6361466  | 1      | 1      | NaN     | 1      |
| mkr9.6705922  | 0.8573 | 0.9232 | -0.0556 | 0.9193 |
| mkr9.715452   | 0.8363 | 0.9109 | -0.0233 | 0.9119 |
| mkr9.715463   | 0.9498 | 0.9743 | 0.0033  | 0.9744 |
| mkr9.715528   | 1      | 1      | NaN     | 1      |
| mkr9.7199022  | 1      | 1      | NaN     | 1      |
| mkr9.7548915  | 0.95   | 0.9743 | 0.0007  | 0.9744 |

|               |        |        |         |        |
|---------------|--------|--------|---------|--------|
| mkr9.8853852  | 0.6081 | 0.7563 | 0.0095  | 0.709  |
| mkr9.8982880  | 1      | 1      | NaN     | 1      |
| mkr9.9235364  | 0.6818 | 0.8108 | 0.7702  | 0.7886 |
| mkr9.9277793  | 0.6248 | 0.7691 | 0.0221  | 0.726  |
| mkr9.9738250  | 0.6109 | 0.7584 | 0.1593  | 0.7602 |
| mkr90.1627412 | 1      | 1      | NaN     | 1      |
| mkr90.2251849 | 0.834  | 0.9095 | -0.069  | 0.9038 |
| mkr90.2267259 | 0.6809 | 0.8102 | 0.1503  | 0.782  |
| mkr90.2267350 | 1      | 1      | NaN     | 1      |
| mkr90.2282629 | 0.95   | 0.9744 | 0       | 0.9744 |
| mkr90.2768849 | 1      | 1      | NaN     | 1      |
| mkr90.307054  | 0.7241 | 0.84   | -0.1571 | 0.8194 |
| mkr90.357330  | 0.7087 | 0.8295 | -0.1732 | 0.8057 |
| mkr90.457907  | 1      | 1      | NaN     | 1      |
| mkr90.777085  | 1      | 1      | NaN     | 1      |
| mkr91.1205970 | 1      | 1      | NaN     | 1      |
| mkr91.1211712 | 1      | 1      | NaN     | 1      |
| mkr91.1211810 | 0.6128 | 0.7599 | -0.2815 | 0.7118 |
| mkr91.2534027 | 1      | 1      | NaN     | 1      |
| mkr91.2606426 | 1      | 1      | NaN     | 1      |
| mkr91.334595  | 1      | 1      | NaN     | 1      |
| mkr91.529343  | 0.9024 | 0.9487 | -0.0263 | 0.9474 |
| mkr91.665529  | 0.8054 | 0.8922 | -0.0916 | 0.8835 |
| mkr91.940467  | 1      | 1      | NaN     | 1      |
| mkr92.2038260 | 1      | 1      | NaN     | 1      |
| mkr92.2419071 | 1      | 1      | NaN     | 1      |
| mkr92.2422299 | 0.9445 | 0.9715 | -0.0015 | 0.9714 |
| mkr92.2473028 | 1      | 1      | NaN     | 1      |
| mkr92.2619127 | 1      | 1      | NaN     | 1      |
| mkr92.2665800 | 0.6969 | 0.8214 | -0.1875 | 0.7948 |
| mkr92.2671311 | 0.95   | 0.9744 | 0       | 0.9744 |
| mkr92.2675650 | 0.95   | 0.9744 | 0       | 0.9744 |
| mkr92.399685  | 1      | 1      | NaN     | 1      |
| mkr92.399754  | 1      | 1      | NaN     | 1      |
| mkr92.437643  | 1      | 1      | NaN     | 1      |
| mkr93.1214797 | 1      | 1      | NaN     | 1      |
| mkr93.1617848 | 0.95   | 0.9743 | 0.0007  | 0.9744 |
| mkr93.1676745 | 0.9474 | 0.973  | -0.0007 | 0.973  |
| mkr93.1991175 | 0.9474 | 0.973  | 0       | 0.973  |
| mkr93.1991227 | 0.8571 | 0.9231 | -0.0541 | 0.9193 |
| mkr93.809525  | 0.95   | 0.9744 | 0       | 0.9744 |
| mkr93.809600  | 0.9024 | 0.9487 | -0.0256 | 0.9474 |

|               |        |        |         |        |
|---------------|--------|--------|---------|--------|
| mkr94.1224135 | 1      | 1      | NaN     | 1      |
| mkr94.1224155 | 1      | 1      | NaN     | 1      |
| mkr94.1388459 | 0.7061 | 0.8278 | 0.2259  | 0.8054 |
| mkr94.154996  | 1      | 1      | NaN     | 1      |
| mkr94.266904  | 0.666  | 0.7995 | 0.14    | 0.7681 |
| mkr94.893455  | 0.7733 | 0.8722 | -0.1176 | 0.8593 |
| mkr95.1902459 | 0.9024 | 0.9487 | -0.0263 | 0.9474 |
| mkr95.2325036 | 1      | 1      | NaN     | 1      |
| mkr95.484575  | 0.9025 | 0.9488 | -0.027  | 0.9474 |
| mkr95.939471  | 1      | 1      | NaN     | 1      |
| mkr954.206    | 1      | 1      | NaN     | 1      |
| mkr96.1178038 | 0.9474 | 0.973  | -0.0007 | 0.973  |
| mkr96.1508337 | 0.5937 | 0.745  | -0.3074 | 0.6909 |
| mkr96.1660600 | 0.95   | 0.9744 | 0       | 0.9744 |
| mkr96.2609885 | 1      | 1      | NaN     | 1      |
| mkr96.495095  | 0.9474 | 0.973  | -0.0007 | 0.973  |
| mkr96.821614  | 1      | 1      | NaN     | 1      |
| mkr97.1416454 | 1      | 1      | NaN     | 1      |
| mkr97.1436084 | 0.9474 | 0.973  | -0.0007 | 0.973  |
| mkr97.1879575 | 1      | 1      | NaN     | 1      |
| mkr97.2209643 | 1      | 1      | NaN     | 1      |
| mkr97.2231867 | 0.8573 | 0.9232 | -0.0556 | 0.9193 |
| mkr97.678075  | 1      | 1      | NaN     | 1      |
| mkr97.722225  | 1      | 1      | NaN     | 1      |
| mkr98.229674  | 1      | 1      | NaN     | 1      |
| mkr98.2411904 | 0.6809 | 0.8102 | 0.1503  | 0.782  |
| mkr98.2679468 | 0.9001 | 0.9474 | 0       | 0.9487 |
| mkr98.721707  | 1      | 1      | NaN     | 1      |
| mkr98.767522  | 0.9499 | 0.9743 | 0.0015  | 0.9744 |
| mkr98.767646  | 0.95   | 0.9744 | 0       | 0.9744 |
| mkr99.1001440 | 0.9413 | 0.9697 | -0.0016 | 0.9697 |
| mkr99.2468548 | 1      | 1      | NaN     | 1      |
| mkr99.2593097 | 0.9474 | 0.973  | 0       | 0.973  |
| mkr99.2593202 | 0.8573 | 0.9232 | -0.0556 | 0.9193 |
| mkr99.340749  | 0.9236 | 0.9603 | -0.0072 | 0.96   |
| mkr99.34892   | 0.95   | 0.9744 | 0       | 0.9744 |
| mkr99.732034  | 1      | 1      | NaN     | 1      |
| mkr99.891964  | 1      | 1      | NaN     | 1      |

Table S2. Genetic linkage map for the LFxTRC F<sub>2</sub> cross. Marker names correspond to physical position on the *M. zebra* genome - e.g., c176.413902 refers to a SNP at 413,902bps on scaffold 176.

| <b>Marker</b> | <b>LG</b> | <b>cM</b> |
|---------------|-----------|-----------|
| c176.413902   | 1         | 0.00      |
| c118.872248   | 1         | 6.45      |
| c242.326181   | 1         | 7.28      |
| c183.979177   | 1         | 7.78      |
| c118.2170572  | 1         | 8.34      |
| c118.2192593  | 1         | 8.53      |
| c269.94077    | 1         | 8.70      |
| c201.101644   | 1         | 9.10      |
| c118.848647   | 1         | 10.63     |
| c53.1793971   | 1         | 13.12     |
| c53.689240    | 1         | 14.51     |
| c7.6781477    | 1         | 24.63     |
| c7.6295430    | 1         | 26.25     |
| c7.5245707    | 1         | 29.40     |
| c7.4421711    | 1         | 30.85     |
| c7.3954257    | 1         | 33.03     |
| c7.1118266    | 1         | 38.80     |
| c7.967062     | 1         | 39.95     |
| c7.247636     | 1         | 41.34     |
| c7.116522     | 1         | 42.43     |
| c2.6496237    | 1         | 55.91     |
| c2.8547835    | 1         | 59.04     |
| c2.11310365   | 1         | 63.32     |
| c2.13257442   | 1         | 64.51     |
| c2.13440188   | 1         | 64.60     |
| c2.14535182   | 1         | 65.94     |
| c2.14347389   | 1         | 66.20     |
| c111.723082   | 1         | 67.11     |
| c111.475213   | 1         | 67.30     |
| c111.1446492  | 1         | 67.45     |
| c2.14709506   | 1         | 67.88     |
| c111.1265773  | 1         | 67.88     |
| c111.1183548  | 1         | 68.53     |
| c111.1108258  | 1         | 68.53     |
| c111.1396077  | 1         | 69.25     |
| c111.276283   | 1         | 69.25     |
| c376.137341   | 1         | 69.59     |
| c111.673317   | 1         | 69.59     |

|              |   |       |
|--------------|---|-------|
| c111.841535  | 1 | 70.51 |
| c111.801372  | 1 | 71.01 |
| c111.1714442 | 1 | 72.20 |
| c121.541222  | 2 | 0.00  |
| c121.263466  | 2 | 0.28  |
| c121.236841  | 2 | 0.28  |
| c121.761167  | 2 | 0.65  |
| c121.1349034 | 2 | 1.40  |
| c121.1981945 | 2 | 1.40  |
| c34.1374429  | 2 | 3.17  |
| c185.1009272 | 2 | 8.12  |
| c29.417650   | 2 | 8.74  |
| c29.495144   | 2 | 8.74  |
| c29.1933214  | 2 | 9.87  |
| c29.1422968  | 2 | 10.62 |
| c29.3798479  | 2 | 11.29 |
| c91.940467   | 2 | 12.53 |
| c29.5049077  | 2 | 13.05 |
| c91.1205970  | 2 | 13.11 |
| c91.2606426  | 2 | 13.11 |
| c91.2534027  | 2 | 13.35 |
| c29.4252059  | 2 | 13.77 |
| c29.3843418  | 2 | 13.77 |
| c91.323585   | 2 | 14.76 |
| c87.2535251  | 2 | 20.66 |
| c87.2223571  | 2 | 21.47 |
| c4.4762465   | 2 | 24.23 |
| c4.4491611   | 2 | 24.83 |
| c4.4449231   | 2 | 25.46 |
| c4.3870733   | 2 | 26.72 |
| c4.2197934   | 2 | 33.77 |
| c4.1613340   | 2 | 35.18 |
| c4.763972    | 2 | 36.86 |
| c198.426720  | 2 | 39.98 |
| c198.760162  | 2 | 41.64 |
| c11.1860811  | 2 | 44.14 |
| c11.2274731  | 2 | 46.25 |
| c11.4650925  | 2 | 48.96 |
| c11.4108123  | 2 | 49.71 |
| c11.4017683  | 2 | 50.53 |
| c11.8641264  | 2 | 52.68 |
| c126.106602  | 3 | 0.00  |

|              |   |       |
|--------------|---|-------|
| c401.125020  | 3 | 2.09  |
| c401.23855   | 3 | 8.21  |
| c126.40052   | 3 | 8.87  |
| c126.884983  | 3 | 9.40  |
| c126.1258056 | 3 | 10.22 |
| c126.1195706 | 3 | 10.88 |
| c209.450133  | 3 | 14.98 |
| c37.1032298  | 3 | 21.74 |
| c37.1533667  | 3 | 23.50 |
| c83.2752434  | 3 | 34.57 |
| c83.2189683  | 3 | 37.34 |
| c83.1876892  | 3 | 37.59 |
| c83.361075   | 3 | 43.51 |
| c176.1066491 | 3 | 45.54 |
| c176.765268  | 3 | 46.74 |
| c260.244333  | 3 | 48.57 |
| c260.72995   | 3 | 48.57 |
| c176.107540  | 3 | 48.93 |
| c260.187819  | 3 | 49.51 |
| c90.2267350  | 3 | 52.07 |
| c90.2768849  | 3 | 53.27 |
| c339.88600   | 3 | 54.69 |
| c339.46552   | 3 | 54.96 |
| c71.3083949  | 3 | 56.92 |
| c71.3028150  | 3 | 57.17 |
| c327.298291  | 3 | 60.84 |
| c277.153938  | 3 | 60.84 |
| c212.867973  | 3 | 61.39 |
| c277.177680  | 3 | 62.74 |
| c46.1956853  | 4 | 0.00  |
| c46.3109816  | 4 | 1.19  |
| c46.3431602  | 4 | 2.62  |
| c46.2805463  | 4 | 3.29  |
| c46.2740192  | 4 | 4.29  |
| c46.2937800  | 4 | 5.07  |
| c46.3696681  | 4 | 5.26  |
| c3242.427    | 4 | 5.92  |
| c46.1475566  | 4 | 6.39  |
| c46.2485898  | 4 | 6.72  |
| c46.1727345  | 4 | 7.27  |
| c46.1034573  | 4 | 7.67  |
| c46.746061   | 4 | 8.04  |

|              |   |       |
|--------------|---|-------|
| c1182.130    | 4 | 9.63  |
| c28.6518363  | 4 | 10.29 |
| c28.5875859  | 4 | 10.88 |
| c28.3649848  | 4 | 13.99 |
| c28.2867294  | 4 | 14.92 |
| c28.3287342  | 4 | 15.72 |
| c28.1739822  | 4 | 17.37 |
| c28.1254555  | 4 | 19.94 |
| c28.917083   | 4 | 21.15 |
| c28.74404    | 4 | 24.60 |
| c61.3236042  | 4 | 25.00 |
| c55.185928   | 4 | 33.25 |
| c55.1047278  | 4 | 33.73 |
| c55.2865395  | 4 | 37.75 |
| c254.62143   | 4 | 39.29 |
| c68.1322642  | 4 | 43.57 |
| c68.1337477  | 4 | 43.57 |
| c85.1747922  | 4 | 53.89 |
| c85.1231246  | 4 | 54.65 |
| c85.1190689  | 4 | 55.06 |
| c85.912276   | 4 | 55.81 |
| c144.1593204 | 4 | 56.64 |
| c218.404880  | 4 | 56.90 |
| c85.304309   | 4 | 57.40 |
| c144.1137020 | 4 | 57.87 |
| c399.125168  | 4 | 59.61 |
| c170.1264595 | 4 | 60.29 |
| c399.80889   | 4 | 60.96 |
| c218.684867  | 4 | 62.02 |
| c58.2592987  | 5 | 0.00  |
| c58.3313327  | 5 | 0.28  |
| c58.1581648  | 5 | 0.54  |
| c58.762343   | 5 | 0.73  |
| c58.2468148  | 5 | 0.78  |
| c15.7408194  | 5 | 10.95 |
| c58.616274   | 5 | 12.69 |
| c58.961373   | 5 | 13.51 |
| c58.3232505  | 5 | 13.51 |
| c58.2516712  | 5 | 13.87 |
| c15.4347678  | 5 | 15.46 |
| c15.6534150  | 5 | 15.46 |
| c15.6910019  | 5 | 16.09 |



|              |   |       |
|--------------|---|-------|
| c15.7292725  | 5 | 16.40 |
| c15.7751170  | 5 | 16.40 |
| c58.3664416  | 5 | 16.59 |
| c58.335065   | 5 | 17.15 |
| c58.418861   | 5 | 17.15 |
| c58.56160    | 5 | 17.15 |
| c58.1211818  | 5 | 17.66 |
| c58.103618   | 5 | 18.04 |
| c58.165782   | 5 | 18.17 |
| c58.3591142  | 5 | 18.70 |
| c58.1097399  | 5 | 19.30 |
| c15.3605310  | 5 | 23.55 |
| c15.2509619  | 5 | 24.33 |
| c18.5133866  | 5 | 31.47 |
| c18.4535886  | 5 | 32.57 |
| c18.4850202  | 5 | 33.05 |
| c18.4038452  | 5 | 34.85 |
| c18.1911839  | 5 | 40.37 |
| c10.3750117  | 5 | 50.90 |
| c10.4181606  | 5 | 52.60 |
| c10.6870455  | 5 | 60.38 |
| c10.8577966  | 5 | 62.92 |
| c10.8956479  | 5 | 63.77 |
| c273.227287  | 5 | 64.75 |
| c273.553359  | 5 | 65.51 |
| c202.464633  | 5 | 66.18 |
| c130.1262569 | 5 | 69.19 |
| c63.2190175  | 5 | 71.08 |
| c191.744332  | 5 | 71.46 |
| c63.2320816  | 5 | 71.77 |
| c63.1799720  | 5 | 72.44 |
| c63.1367818  | 5 | 73.22 |
| c208.213442  | 5 | 75.24 |
| c1.3066840   | 6 | 0.00  |
| c1.3052167   | 6 | 0.08  |
| c1.4667697   | 6 | 0.39  |
| c1.5258772   | 6 | 0.66  |
| c1.1573715   | 6 | 0.66  |
| c267.291298  | 6 | 1.00  |
| c267.232348  | 6 | 1.00  |
| c1.2443647   | 6 | 1.33  |
| c267.526200  | 6 | 1.52  |

|              |   |       |
|--------------|---|-------|
| c267.190153  | 6 | 1.52  |
| c267.241466  | 6 | 1.52  |
| c1.351080    | 6 | 2.07  |
| c517.60293   | 6 | 2.07  |
| c1.229937    | 6 | 2.51  |
| c1.373004    | 6 | 3.17  |
| c267.174228  | 6 | 3.91  |
| c267.71183   | 6 | 4.14  |
| c267.480796  | 6 | 5.26  |
| c1.6031297   | 6 | 6.15  |
| c1.8682937   | 6 | 10.22 |
| c1.9086673   | 6 | 10.83 |
| c1.9514500   | 6 | 11.29 |
| c1.11505120  | 6 | 13.44 |
| c1.12449379  | 6 | 15.15 |
| c1.12706277  | 6 | 15.40 |
| c1.13554615  | 6 | 17.05 |
| c1.13908978  | 6 | 18.00 |
| c1.14802276  | 6 | 19.84 |
| c1.15055852  | 6 | 20.64 |
| c97.1416454  | 6 | 27.31 |
| c97.2231867  | 6 | 29.37 |
| c20.3505382  | 6 | 40.71 |
| c20.3374827  | 6 | 42.10 |
| c20.3463531  | 6 | 42.28 |
| c20.1015081  | 6 | 47.15 |
| c20.1150236  | 6 | 47.61 |
| c20.1074039  | 6 | 49.02 |
| c20.526888   | 6 | 50.89 |
| c140.1285494 | 6 | 52.29 |
| c289.77171   | 6 | 56.27 |
| c80.429590   | 6 | 57.82 |
| c200.53324   | 6 | 58.45 |
| c200.799640  | 6 | 59.33 |
| c150.1455638 | 6 | 59.56 |
| c187.449360  | 6 | 60.19 |
| c200.856936  | 6 | 60.19 |
| c80.100119   | 6 | 60.69 |
| c80.2061639  | 6 | 61.25 |
| c80.2290796  | 6 | 61.38 |
| c214.463068  | 6 | 61.38 |
| c80.2958406  | 6 | 61.38 |

|              |   |       |
|--------------|---|-------|
| c220.155160  | 6 | 61.57 |
| c214.355176  | 6 | 61.57 |
| c214.677554  | 6 | 62.09 |
| c220.741458  | 6 | 62.09 |
| c80.683555   | 6 | 62.37 |
| c80.917854   | 6 | 62.96 |
| c80.1086135  | 6 | 64.39 |
| c1302.680    | 7 | 0.00  |
| c193.987462  | 7 | 5.39  |
| c222.782479  | 7 | 5.62  |
| c193.692577  | 7 | 6.67  |
| c193.1053642 | 7 | 6.78  |
| c193.525564  | 7 | 7.31  |
| c222.602115  | 7 | 7.31  |
| c261.233122  | 7 | 7.49  |
| c193.863517  | 7 | 7.49  |
| c380.137971  | 7 | 7.49  |
| c222.643136  | 7 | 7.87  |
| c193.724877  | 7 | 7.87  |
| c764.12526   | 7 | 7.87  |
| c261.337724  | 7 | 7.87  |
| c193.69558   | 7 | 8.03  |
| c363.116741  | 7 | 8.03  |
| c193.268450  | 7 | 8.03  |
| c222.317699  | 7 | 8.03  |
| c363.99662   | 7 | 8.28  |
| c115.1207193 | 7 | 9.50  |
| c115.291751  | 7 | 9.72  |
| c115.713052  | 7 | 9.72  |
| c155.294078  | 7 | 9.90  |
| c115.1767806 | 7 | 9.90  |
| c155.1520985 | 7 | 10.38 |
| c100.563038  | 7 | 12.93 |
| c124.1667602 | 7 | 14.65 |
| c21.5242487  | 7 | 19.06 |
| c21.4568542  | 7 | 19.66 |
| c21.2195347  | 7 | 24.74 |
| c0.5071706   | 7 | 33.65 |
| c0.7061265   | 7 | 36.31 |
| c0.8989175   | 7 | 39.35 |
| c0.12844052  | 7 | 42.85 |
| c0.14345619  | 7 | 43.72 |

|              |   |       |
|--------------|---|-------|
| c0.15218636  | 7 | 44.00 |
| c0.17182901  | 7 | 45.35 |
| c0.17575903  | 7 | 45.64 |
| c77.2676871  | 7 | 46.27 |
| c0.18725296  | 7 | 46.56 |
| c77.2013045  | 7 | 48.56 |
| c77.852384   | 7 | 48.56 |
| c45.78615    | 7 | 49.63 |
| c592.37147   | 7 | 49.83 |
| c45.129073   | 7 | 49.99 |
| c45.384983   | 7 | 50.14 |
| c45.3822407  | 7 | 52.91 |
| c99.1001440  | 7 | 54.04 |
| c99.732034   | 7 | 54.04 |
| c93.1991175  | 7 | 57.91 |
| c93.1617848  | 7 | 58.53 |
| c93.1214797  | 7 | 60.07 |
| c134.1691066 | 7 | 62.31 |
| c32.96945    | 7 | 68.72 |
| c321.67545   | 7 | 68.83 |
| c32.997106   | 7 | 69.18 |
| c32.480568   | 7 | 69.18 |
| c32.588851   | 7 | 69.67 |
| c32.1479523  | 7 | 71.44 |
| c32.2151495  | 7 | 72.99 |
| c32.2551051  | 7 | 73.15 |
| c32.2656168  | 7 | 73.33 |
| c32.3471997  | 7 | 73.33 |
| c89.778084   | 7 | 79.51 |
| c89.2810351  | 7 | 80.65 |
| c32.5715629  | 7 | 80.97 |
| c89.2721619  | 7 | 82.31 |
| c89.506532   | 7 | 83.20 |
| c89.1762493  | 7 | 83.20 |
| c89.39445    | 7 | 83.69 |
| c139.1512150 | 7 | 84.82 |
| c152.263656  | 7 | 85.10 |
| c139.1113473 | 7 | 85.10 |
| c152.965466  | 7 | 85.10 |
| c152.149395  | 7 | 85.20 |
| c89.171781   | 7 | 86.22 |
| c106.2225648 | 8 | 0.00  |

|              |   |       |
|--------------|---|-------|
| c106.960449  | 8 | 1.00  |
| c106.1955076 | 8 | 1.70  |
| c106.1012963 | 8 | 2.26  |
| c106.979373  | 8 | 2.74  |
| c106.1399010 | 8 | 2.74  |
| c106.958209  | 8 | 2.74  |
| c106.1809812 | 8 | 2.93  |
| c106.2056114 | 8 | 3.35  |
| c106.732973  | 8 | 4.12  |
| c106.654872  | 8 | 4.41  |
| c106.195850  | 8 | 5.17  |
| c113.1256930 | 8 | 7.30  |
| c113.1027945 | 8 | 7.48  |
| c113.1078023 | 8 | 7.48  |
| c113.191603  | 8 | 9.36  |
| c47.3312799  | 8 | 11.34 |
| c47.718092   | 8 | 15.39 |
| c47.177665   | 8 | 16.39 |
| c132.348543  | 8 | 30.62 |
| c132.627024  | 8 | 32.16 |
| c190.910676  | 8 | 38.72 |
| c190.934937  | 8 | 38.88 |
| c81.1607889  | 8 | 46.60 |
| c81.1208612  | 8 | 47.83 |
| c81.738949   | 8 | 48.39 |
| c81.516147   | 8 | 49.15 |
| c159.85245   | 8 | 56.92 |
| c159.550743  | 8 | 57.38 |
| c159.654801  | 8 | 57.70 |
| c171.303063  | 8 | 60.99 |
| c142.1407017 | 9 | 0.00  |
| c211.558189  | 9 | 2.38  |
| c633.16114   | 9 | 2.92  |
| c253.360999  | 9 | 3.14  |
| c157.316235  | 9 | 8.40  |
| c157.574609  | 9 | 8.59  |
| c157.586784  | 9 | 9.17  |
| c13.1631145  | 9 | 13.69 |
| c13.3659624  | 9 | 18.78 |
| c13.3714129  | 9 | 19.32 |
| c13.5636012  | 9 | 26.49 |
| c13.6386857  | 9 | 28.05 |

|             |     |       |
|-------------|-----|-------|
| c13.7779905 | 9   | 33.19 |
| c13.8441477 | 9   | 35.06 |
| c27.3981126 | 9   | 47.93 |
| c27.4205615 | 9   | 48.71 |
| c386.74434  | 9   | 52.08 |
| c27.487981  | 9   | 53.09 |
| c228.251373 | 9   | 55.67 |
| c230.197486 | 9   | 56.12 |
| c177.537945 | 9   | 56.68 |
| c177.317559 | 9   | 56.94 |
| c177.880089 | 9   | 56.94 |
| c177.620048 | 9   | 57.13 |
| c177.914961 | 9   | 57.13 |
| c177.83871  | 9   | 57.51 |
| c230.735168 | 9   | 58.48 |
| c230.322809 | 9   | 58.57 |
| c22.2628020 | 10a | 0.00  |
| c22.3323932 | 10a | 0.12  |
| c22.3944791 | 10a | 1.37  |
| c22.4015123 | 10a | 1.78  |
| c22.4477242 | 10a | 2.59  |
| c22.6622454 | 10a | 7.23  |
| c76.578829  | 10a | 8.60  |
| c76.2151896 | 10a | 11.68 |
| c25.1963261 | 10a | 18.58 |
| c25.840042  | 10a | 21.55 |
| c48.1674459 | 10a | 23.98 |
| c48.1773675 | 10a | 25.03 |
| c48.2013983 | 10a | 25.44 |
| c48.1847962 | 10a | 25.65 |
| c48.1911270 | 10a | 25.65 |
| c48.3062376 | 10a | 26.39 |
| c48.3800164 | 10a | 26.58 |
| c48.2559819 | 10a | 26.75 |
| c48.3226245 | 10a | 26.75 |
| c48.751108  | 10a | 28.55 |
| c48.17981   | 10a | 28.55 |
| c48.441883  | 10a | 29.13 |
| c48.972966  | 10a | 30.48 |
| c25.61537   | 10a | 31.80 |
| c94.1388459 | 10b | 0.00  |
| c94.1628475 | 10b | 1.44  |

|              |     |       |
|--------------|-----|-------|
| c94.1224135  | 10b | 2.97  |
| c131.57821   | 10b | 14.27 |
| c311.330558  | 10b | 15.00 |
| c75.397315   | 10b | 15.27 |
| c131.1115228 | 10b | 15.27 |
| c75.1746024  | 10b | 16.78 |
| c75.3108715  | 10b | 16.95 |
| c75.1691681  | 10b | 17.48 |
| c50.3773664  | 10b | 19.30 |
| c50.3479555  | 10b | 19.63 |
| c50.2376745  | 10b | 21.09 |
| c249.305594  | 11  | 0.00  |
| c249.209454  | 11  | 0.28  |
| c143.1548276 | 11  | 0.62  |
| c143.1413477 | 11  | 0.81  |
| c207.409342  | 11  | 1.14  |
| c66.2963730  | 11  | 1.53  |
| c66.2410294  | 11  | 1.82  |
| c66.749462   | 11  | 3.23  |
| c66.2010471  | 11  | 3.59  |
| c24.6391865  | 11  | 3.59  |
| c24.5786366  | 11  | 4.61  |
| c24.5476147  | 11  | 6.00  |
| c24.4409149  | 11  | 7.67  |
| c24.1498644  | 11  | 14.13 |
| c24.869308   | 11  | 15.79 |
| c4.5194468   | 11  | 18.45 |
| c4.6484708   | 11  | 22.00 |
| c4.6921427   | 11  | 27.19 |
| c105.2327575 | 11  | 49.50 |
| c64.121077   | 11  | 51.18 |
| c64.2440212  | 11  | 51.79 |
| c196.631070  | 11  | 53.00 |
| c196.269495  | 11  | 53.20 |
| c64.3024594  | 11  | 53.50 |
| c196.1018121 | 11  | 53.81 |
| c189.295714  | 11  | 54.03 |
| c151.1461990 | 11  | 54.03 |
| c105.1526206 | 11  | 58.15 |
| c105.283835  | 11  | 61.08 |
| c137.1666100 | 11  | 63.49 |
| c137.1055183 | 11  | 63.49 |

|              |    |        |
|--------------|----|--------|
| c123.1856536 | 11 | 66.08  |
| c123.288361  | 11 | 68.51  |
| c4.11531224  | 11 | 70.04  |
| c4.10326095  | 11 | 72.55  |
| c4.9779402   | 11 | 73.45  |
| c24.2241099  | 11 | 94.69  |
| c207.450361  | 11 | 105.07 |
| c184.9322    | 11 | 105.69 |
| c207.166589  | 11 | 106.04 |
| c207.366665  | 11 | 106.23 |
| c184.784426  | 11 | 106.23 |
| c207.226853  | 11 | 106.23 |
| c184.376809  | 11 | 106.23 |
| c184.113499  | 11 | 106.23 |
| c207.271793  | 11 | 106.23 |
| c184.175006  | 11 | 106.60 |
| c184.46077   | 11 | 106.60 |
| c184.555215  | 11 | 106.60 |
| c56.3640997  | 12 | 0.00   |
| c56.3795734  | 12 | 0.19   |
| c128.417935  | 12 | 1.54   |
| c56.73579    | 12 | 2.15   |
| c56.1032443  | 12 | 2.15   |
| c128.921623  | 12 | 2.71   |
| c128.798952  | 12 | 3.08   |
| c128.1538240 | 12 | 4.63   |
| c112.508797  | 12 | 5.52   |
| c275.173698  | 12 | 6.43   |
| c275.173724  | 12 | 6.43   |
| c9.52565     | 12 | 7.26   |
| c9.715528    | 12 | 7.70   |
| c9.1045461   | 12 | 8.63   |
| c9.1550348   | 12 | 8.79   |
| c9.2080971   | 12 | 9.22   |
| c9.3328967   | 12 | 11.69  |
| c9.4123992   | 12 | 13.91  |
| c9.4999064   | 12 | 15.93  |
| c9.4832819   | 12 | 16.82  |
| c9.5732160   | 12 | 18.81  |
| c9.6193445   | 12 | 19.01  |
| c9.6361466   | 12 | 19.77  |
| c9.7199022   | 12 | 21.37  |



|              |     |       |
|--------------|-----|-------|
| c9.7406283   | 12  | 22.58 |
| c9.9277793   | 12  | 27.82 |
| c14.6883973  | 12  | 33.93 |
| c14.2368660  | 12  | 47.09 |
| c14.1232448  | 12  | 49.93 |
| c122.1805593 | 12  | 51.97 |
| c43.3740431  | 12  | 53.25 |
| c43.4282131  | 12  | 53.71 |
| c43.3112192  | 12  | 54.18 |
| c43.1093337  | 12  | 55.72 |
| c334.32851   | 12  | 57.14 |
| c197.143069  | 12  | 57.66 |
| c197.678856  | 12  | 57.66 |
| c26.2061138  | 13a | 0.00  |
| c26.2904773  | 13a | 0.26  |
| c26.2173503  | 13a | 0.77  |
| c44.2763411  | 13a | 23.98 |
| c44.3129525  | 13a | 25.32 |
| c44.3044568  | 13a | 25.55 |
| c62.3129666  | 13a | 31.18 |
| c62.2721053  | 13a | 32.43 |
| c62.1648691  | 13a | 35.75 |
| c38.302681   | 13a | 37.40 |
| c38.1591063  | 13a | 38.50 |
| c38.608518   | 13a | 38.68 |
| c38.2111260  | 13a | 39.83 |
| c38.2348122  | 13a | 40.58 |
| c38.2529240  | 13a | 40.96 |
| c38.4947770  | 13a | 41.64 |
| c38.4347834  | 13a | 42.07 |
| c38.4996752  | 13a | 43.01 |
| c38.4822818  | 13a | 43.01 |
| c38.4329266  | 13a | 43.77 |
| c38.3098970  | 13a | 45.03 |
| c26.1362137  | 13b | 0.00  |
| c26.802414   | 13b | 2.50  |
| c26.117534   | 13b | 5.08  |
| c165.764309  | 13b | 6.27  |
| c165.663394  | 13b | 6.27  |
| c165.782176  | 13b | 6.66  |
| c378.88823   | 13b | 11.69 |
| c332.343815  | 13b | 13.17 |

|              |     |       |
|--------------|-----|-------|
| c332.103334  | 13b | 13.39 |
| c258.42397   | 13b | 14.15 |
| c217.472692  | 13b | 14.15 |
| c258.593310  | 13b | 14.41 |
| c378.205232  | 13b | 14.83 |
| c174.406531  | 13b | 15.09 |
| c378.218014  | 13b | 15.24 |
| c378.153639  | 13b | 15.42 |
| c174.239994  | 13b | 15.75 |
| c33.4451453  | 13b | 17.23 |
| c103.1698424 | 14  | 0.00  |
| c103.1440300 | 14  | 1.30  |
| c103.903069  | 14  | 1.65  |
| c272.486229  | 14  | 1.87  |
| c103.879554  | 14  | 2.22  |
| c219.609639  | 14  | 2.50  |
| c272.370532  | 14  | 2.78  |
| c352.172633  | 14  | 2.97  |
| c103.950342  | 14  | 3.03  |
| c103.514274  | 14  | 3.03  |
| c103.397897  | 14  | 3.27  |
| c103.312831  | 14  | 3.27  |
| c103.427188  | 14  | 3.65  |
| c103.119969  | 14  | 3.65  |
| c219.154502  | 14  | 3.65  |
| c103.768628  | 14  | 3.90  |
| c158.620001  | 14  | 5.29  |
| c67.85458    | 14  | 6.53  |
| c67.944408   | 14  | 7.16  |
| c67.2910953  | 14  | 9.81  |
| c67.2877725  | 14  | 10.23 |
| c54.3551926  | 14  | 11.04 |
| c54.3625582  | 14  | 11.23 |
| c54.3306346  | 14  | 11.87 |
| c8.533330    | 14  | 16.85 |
| c8.476905    | 14  | 16.85 |
| c8.1850865   | 14  | 19.17 |
| c8.3563172   | 14  | 24.35 |
| c8.5000737   | 14  | 27.75 |
| c8.4914044   | 14  | 28.29 |
| c8.6918698   | 14  | 34.56 |
| c8.6141741   | 14  | 34.85 |

|              |    |       |
|--------------|----|-------|
| c8.7656076   | 14 | 38.26 |
| c125.302576  | 14 | 50.45 |
| c125.1904299 | 14 | 51.21 |
| c84.178152   | 14 | 52.04 |
| c84.1673690  | 14 | 54.26 |
| c84.1823503  | 14 | 54.26 |
| c216.536016  | 14 | 55.97 |
| c0.3426417   | 14 | 56.93 |
| c225.417828  | 14 | 56.93 |
| c0.2582514   | 14 | 57.31 |
| c0.1325166   | 14 | 57.67 |
| c0.358525    | 14 | 57.67 |
| c84.2526567  | 14 | 58.14 |
| c225.600890  | 14 | 59.34 |
| c0.1839752   | 14 | 60.29 |
| c5.11506904  | 15 | 0.00  |
| c5.11598727  | 15 | 0.39  |
| c5.10949892  | 15 | 1.28  |
| c5.10531264  | 15 | 1.47  |
| c5.10544702  | 15 | 1.47  |
| c5.10123596  | 15 | 2.02  |
| c5.7621500   | 15 | 5.01  |
| c5.3628458   | 15 | 12.01 |
| c5.2188607   | 15 | 14.62 |
| c5.1053255   | 15 | 16.27 |
| c5.897770    | 15 | 18.11 |
| c146.88596   | 15 | 26.84 |
| c23.526752   | 15 | 29.94 |
| c23.725455   | 15 | 30.91 |
| c23.1502215  | 15 | 34.00 |
| c23.2244807  | 15 | 36.25 |
| c23.5084661  | 15 | 42.86 |
| c141.717891  | 15 | 49.30 |
| c71.8341     | 15 | 49.87 |
| c71.2203217  | 15 | 50.42 |
| c71.1392891  | 15 | 50.42 |
| c71.2498371  | 15 | 50.99 |
| c71.2453154  | 15 | 50.99 |
| c227.140520  | 15 | 51.18 |
| c227.470495  | 15 | 51.18 |
| c252.364678  | 15 | 51.18 |
| c227.318668  | 15 | 51.51 |

|              |    |       |
|--------------|----|-------|
| c252.371886  | 15 | 51.51 |
| c116.2264444 | 15 | 52.19 |
| c227.629583  | 15 | 52.19 |
| c711.4266    | 15 | 52.58 |
| c252.399910  | 15 | 52.58 |
| c116.1492109 | 15 | 54.27 |
| c116.622790  | 15 | 54.46 |
| c101.1308428 | 15 | 54.63 |
| c78.1650993  | 15 | 55.77 |
| c78.2928755  | 15 | 55.96 |
| c78.2233973  | 15 | 55.96 |
| c101.2583528 | 15 | 57.21 |
| c282.468875  | 15 | 57.66 |
| c282.305424  | 15 | 58.09 |
| c78.2289518  | 15 | 58.75 |
| c101.2318917 | 15 | 59.48 |
| c74.464726   | 15 | 61.61 |
| c74.1700086  | 15 | 62.40 |
| c74.2002180  | 15 | 63.83 |
| c203.264364  | 16 | 0.00  |
| c203.433118  | 16 | 1.28  |
| c194.724627  | 16 | 2.42  |
| c194.38402   | 16 | 2.72  |
| c149.749122  | 16 | 3.57  |
| c149.1197825 | 16 | 3.79  |
| c233.480098  | 16 | 5.15  |
| c233.570638  | 16 | 5.15  |
| c232.426604  | 16 | 9.50  |
| c136.317137  | 16 | 9.89  |
| c117.69559   | 16 | 10.41 |
| c161.42395   | 16 | 10.41 |
| c232.149836  | 16 | 10.58 |
| c161.393289  | 16 | 11.49 |
| c161.1087673 | 16 | 11.71 |
| c161.649535  | 16 | 12.23 |
| c25.3924423  | 16 | 16.59 |
| c25.5762978  | 16 | 22.58 |
| c52.3743243  | 16 | 24.14 |
| c52.2131378  | 16 | 27.53 |
| c52.2028519  | 16 | 29.03 |
| c52.904299   | 16 | 32.12 |
| c42.1183857  | 16 | 38.63 |

|              |    |       |
|--------------|----|-------|
| c42.1772644  | 16 | 40.13 |
| c86.1495785  | 16 | 50.27 |
| c86.1478524  | 16 | 50.27 |
| c86.1948588  | 16 | 51.62 |
| c86.77728    | 16 | 52.84 |
| c59.162629   | 16 | 53.49 |
| c114.699648  | 16 | 55.98 |
| c59.2271395  | 16 | 55.98 |
| c59.1052252  | 16 | 57.41 |
| c59.3219508  | 16 | 57.98 |
| c114.1602092 | 16 | 59.17 |
| c284.235598  | 16 | 60.04 |
| c284.70531   | 16 | 60.25 |
| c114.2162757 | 16 | 60.25 |
| c358.218506  | 16 | 60.63 |
| c114.2315433 | 16 | 60.82 |
| c284.499949  | 16 | 60.82 |
| c179.14604   | 17 | 0.00  |
| c328.254502  | 17 | 0.44  |
| c452.37855   | 17 | 0.93  |
| c328.180836  | 17 | 1.19  |
| c179.323859  | 17 | 1.57  |
| c179.50706   | 17 | 1.57  |
| c179.430578  | 17 | 1.57  |
| c179.73942   | 17 | 1.57  |
| c179.753768  | 17 | 1.57  |
| c79.2863748  | 17 | 3.30  |
| c79.2795339  | 17 | 3.67  |
| c79.2672431  | 17 | 5.03  |
| c79.2295538  | 17 | 7.40  |
| c79.839946   | 17 | 7.86  |
| c129.1164946 | 17 | 11.14 |
| c129.349327  | 17 | 11.58 |
| c154.1486002 | 17 | 14.18 |
| c154.63018   | 17 | 18.08 |
| c102.1562998 | 17 | 20.53 |
| c102.2092170 | 17 | 21.23 |
| c102.2179904 | 17 | 21.39 |
| c102.1157010 | 17 | 21.61 |
| c102.979529  | 17 | 22.63 |
| c102.105429  | 17 | 22.88 |
| c119.1566939 | 17 | 23.34 |

|              |    |       |
|--------------|----|-------|
| c119.1592583 | 17 | 23.53 |
| c102.859476  | 17 | 23.96 |
| c119.206524  | 17 | 26.11 |
| c163.97009   | 17 | 27.43 |
| c163.824742  | 17 | 28.04 |
| c255.535692  | 17 | 29.67 |
| c17.6824745  | 17 | 31.71 |
| c255.145939  | 17 | 32.46 |
| c17.6667332  | 17 | 33.59 |
| c17.3331825  | 17 | 41.56 |
| c17.2683496  | 17 | 43.87 |
| c17.1307673  | 17 | 47.29 |
| c17.1039358  | 17 | 48.96 |
| c69.2176681  | 17 | 53.67 |
| c69.976586   | 17 | 55.93 |
| c69.582575   | 17 | 56.13 |
| c69.207005   | 17 | 56.32 |
| c69.84822    | 17 | 56.57 |
| c35.5106080  | 17 | 57.07 |
| c35.4453004  | 17 | 57.44 |
| c35.4032477  | 17 | 57.44 |
| c35.3072993  | 17 | 58.75 |
| c35.2846676  | 17 | 58.75 |
| c35.389880   | 17 | 59.71 |
| c35.187861   | 17 | 60.44 |
| c35.1660426  | 17 | 60.44 |
| c35.960460   | 17 | 60.80 |
| c35.1080179  | 17 | 60.80 |
| c35.288320   | 17 | 60.80 |
| c235.174220  | 17 | 61.43 |
| c235.357273  | 17 | 61.94 |
| c235.665471  | 17 | 63.13 |
| c35.142159   | 17 | 64.98 |
| c109.46112   | 18 | 0.00  |
| c215.432511  | 18 | 1.54  |
| c156.792769  | 18 | 2.31  |
| c215.713627  | 18 | 2.32  |
| c298.303102  | 18 | 2.51  |
| c368.126357  | 18 | 2.70  |
| c248.79966   | 18 | 2.70  |
| c291.199767  | 18 | 3.49  |
| c291.125728  | 18 | 3.49  |

|              |    |       |
|--------------|----|-------|
| c109.2314746 | 18 | 6.75  |
| c41.248320   | 18 | 7.62  |
| c41.2756600  | 18 | 12.83 |
| c6.9719709   | 18 | 18.58 |
| c6.9610135   | 18 | 19.52 |
| c6.4755229   | 18 | 29.71 |
| c6.4626408   | 18 | 31.02 |
| c6.3324274   | 18 | 33.31 |
| c6.2501428   | 18 | 36.01 |
| c6.2366313   | 18 | 36.71 |
| c6.2183722   | 18 | 37.84 |
| c6.1621678   | 18 | 39.83 |
| c6.553730    | 18 | 42.03 |
| c173.1228639 | 18 | 44.31 |
| c173.140530  | 18 | 47.68 |
| c127.2095058 | 18 | 51.64 |
| c326.236274  | 18 | 54.78 |
| c326.365303  | 18 | 55.15 |
| c326.108181  | 18 | 55.15 |
| c231.108225  | 18 | 55.52 |
| c107.63323   | 18 | 56.09 |
| c104.2533690 | 18 | 56.83 |
| c265.270501  | 18 | 58.93 |
| c96.185530   | 19 | 0.00  |
| c96.1660600  | 19 | 0.39  |
| c96.821614   | 19 | 0.91  |
| c96.495095   | 19 | 0.91  |
| c39.1628160  | 19 | 2.52  |
| c162.956970  | 19 | 6.38  |
| c162.290035  | 19 | 6.65  |
| c162.1278520 | 19 | 7.03  |
| c39.4871541  | 19 | 7.11  |
| c39.4456156  | 19 | 7.39  |
| c162.268654  | 19 | 7.77  |
| c162.1185149 | 19 | 8.10  |
| c162.91053   | 19 | 8.23  |
| c120.324755  | 19 | 10.35 |
| c120.1764231 | 19 | 13.39 |
| c120.2095492 | 19 | 14.97 |
| c60.3623148  | 19 | 16.54 |
| c60.3518368  | 19 | 17.29 |
| c60.1756320  | 19 | 21.57 |

|              |    |       |
|--------------|----|-------|
| c3.2777527   | 19 | 32.14 |
| c3.2598256   | 19 | 32.99 |
| c3.5383062   | 19 | 39.95 |
| c3.6074543   | 19 | 42.08 |
| c3.6254422   | 19 | 43.70 |
| c3.7270882   | 19 | 44.83 |
| c3.8607270   | 19 | 45.95 |
| c3.9947178   | 19 | 49.10 |
| c3.11373809  | 19 | 50.38 |
| c3.12216193  | 19 | 51.84 |
| c3.12245187  | 19 | 52.47 |
| c12.6681058  | 20 | 0.00  |
| c12.8352875  | 20 | 2.52  |
| c65.3409293  | 20 | 4.43  |
| c65.2569667  | 20 | 5.28  |
| c133.901955  | 20 | 17.22 |
| c133.1498314 | 20 | 25.20 |
| c133.1517469 | 20 | 25.85 |
| c133.1691350 | 20 | 26.51 |
| c240.276728  | 20 | 27.58 |
| c240.104056  | 20 | 27.99 |
| c133.1214284 | 20 | 28.21 |
| c65.259032   | 20 | 30.31 |
| c65.341179   | 20 | 30.77 |
| c65.1912938  | 20 | 35.21 |
| c65.1871866  | 20 | 35.40 |
| c12.7181313  | 20 | 41.83 |
| c12.6118322  | 20 | 44.48 |
| c12.4350566  | 20 | 51.09 |
| c12.2435698  | 20 | 61.03 |
| c180.85087   | 20 | 67.13 |
| c12.1169539  | 20 | 67.90 |
| c349.25045   | 20 | 68.42 |
| c12.535959   | 20 | 69.51 |
| c108.1174693 | 20 | 71.23 |
| c108.893801  | 20 | 71.43 |
| c164.758643  | 20 | 72.00 |
| c164.1188740 | 20 | 72.00 |
| c164.969127  | 20 | 72.20 |
| c164.1002795 | 20 | 72.51 |
| c224.387080  | 20 | 74.31 |
| c224.619455  | 20 | 74.50 |



|              |    |       |
|--------------|----|-------|
| c341.214005  | 20 | 75.08 |
| c181.1152942 | 20 | 77.07 |
| c181.1152863 | 20 | 77.31 |
| c36.2855869  | 20 | 85.62 |
| c36.3001036  | 20 | 87.54 |
| c57.50901    | 20 | 91.64 |
| c57.144379   | 20 | 92.13 |
| c57.756810   | 20 | 93.83 |
| c57.1869747  | 20 | 94.61 |
| c57.1376162  | 20 | 95.04 |
| c57.2440332  | 20 | 96.08 |
| c57.2736955  | 20 | 96.44 |
| c57.3236696  | 20 | 96.78 |
| c168.876142  | 21 | 0.00  |
| c168.730099  | 21 | 0.21  |
| c168.5735    | 21 | 1.20  |
| c40.4488591  | 21 | 2.37  |
| c40.4283073  | 21 | 3.29  |
| c40.2938997  | 21 | 4.66  |
| c40.2358407  | 21 | 4.66  |
| c40.3022819  | 21 | 4.89  |
| c40.3830869  | 21 | 5.41  |
| c40.3266945  | 21 | 5.41  |
| c40.474302   | 21 | 10.47 |
| c49.4071436  | 21 | 12.93 |
| c49.3492002  | 21 | 15.36 |
| c49.1488593  | 21 | 18.57 |
| c49.1116440  | 21 | 19.01 |
| c49.273340   | 21 | 22.13 |
| c49.173490   | 21 | 22.39 |
| c49.28496    | 21 | 23.03 |
| c49.381280   | 21 | 23.80 |
| c31.1672513  | 21 | 29.01 |
| c31.2946476  | 21 | 32.40 |
| c31.3029619  | 21 | 33.01 |
| c238.187375  | 21 | 40.99 |
| c110.1413215 | 21 | 42.22 |
| c110.1751283 | 21 | 42.81 |
| c238.273505  | 21 | 42.97 |
| c82.1205886  | 21 | 43.92 |
| c82.2223376  | 21 | 44.30 |
| c82.1822328  | 21 | 44.73 |

|             |    |       |
|-------------|----|-------|
| c88.517263  | 21 | 46.67 |
| c337.215118 | 21 | 46.67 |
| c88.1088680 | 21 | 47.99 |
| c88.2302395 | 21 | 48.52 |
| c88.2483438 | 21 | 48.92 |
| c88.1431733 | 21 | 49.30 |
| c88.928683  | 21 | 49.52 |
| c188.964104 | 21 | 50.52 |
| c188.777573 | 21 | 50.69 |
| c188.78098  | 21 | 50.92 |
| c241.189666 | 21 | 52.75 |
| c241.12159  | 21 | 53.18 |
| c30.4120609 | 21 | 55.96 |
| c30.5469598 | 21 | 56.71 |
| c30.5310411 | 21 | 57.08 |
| c30.6098430 | 21 | 58.55 |
| c250.317164 | 21 | 59.73 |
| c259.89154  | 21 | 59.98 |
| c95.35541   | 21 | 61.22 |
| c210.488716 | 22 | 0.00  |
| c210.72804  | 22 | 0.17  |
| c210.678976 | 22 | 0.56  |
| c307.157379 | 22 | 1.10  |
| c314.181610 | 22 | 1.98  |
| c314.153029 | 22 | 2.19  |
| c276.283073 | 22 | 3.73  |
| c276.278368 | 22 | 4.10  |
| c160.277522 | 22 | 4.31  |
| c276.521616 | 22 | 4.73  |
| c221.357981 | 22 | 6.06  |
| c223.388593 | 22 | 7.57  |
| c223.770979 | 22 | 8.08  |
| c153.856555 | 22 | 10.43 |
| c153.474734 | 22 | 11.05 |
| c153.102606 | 22 | 12.35 |
| c19.673603  | 22 | 13.35 |
| c19.371691  | 22 | 13.47 |
| c19.1976816 | 22 | 16.14 |
| c19.2295722 | 22 | 17.17 |
| c19.2793662 | 22 | 18.60 |
| c19.3607860 | 22 | 21.73 |
| c19.4625350 | 22 | 23.22 |

|             |    |       |
|-------------|----|-------|
| c19.4408724 | 22 | 24.39 |
| c19.7047424 | 22 | 30.99 |
| c16.7276763 | 22 | 33.19 |
| c16.4535793 | 22 | 44.99 |
| c16.3622993 | 22 | 47.62 |
| c16.1886033 | 22 | 49.78 |
| c16.313778  | 22 | 50.15 |
| c16.1217679 | 22 | 50.15 |
| c281.336610 | 22 | 51.56 |
| c281.418560 | 22 | 51.56 |
| c98.2679468 | 22 | 51.80 |
| c98.2376212 | 22 | 53.16 |
| c98.2411904 | 22 | 53.16 |
| c98.1470248 | 22 | 54.65 |
| c98.632783  | 22 | 55.32 |
| c98.767646  | 22 | 55.57 |
| c98.721707  | 22 | 55.57 |
| c92.2473028 | 22 | 56.57 |
| c98.229674  | 22 | 56.57 |
| c92.2038260 | 22 | 56.57 |
| c92.399685  | 22 | 56.95 |
| c70.463069  | 22 | 56.95 |
| c70.264614  | 22 | 57.14 |
| c70.3130098 | 22 | 57.38 |
| c251.251362 | 22 | 57.93 |
| c92.2675650 | 22 | 59.54 |

Table S3. Xanthophore-based color QTL interval for the *pax3a* locus on LG18

| QTL interval for R-Y flank color: |    |       |
|-----------------------------------|----|-------|
| Marker (scaffold.Mb)              | LG | cM    |
| c6.9610135                        | 18 | 19.52 |
| c6.4755229                        | 18 | 29.71 |
| c6.4626408                        | 18 | 31.02 |
| c6.3324274                        | 18 | 33.31 |
| c6.2501428                        | 18 | 36.01 |
| c6.2366313                        | 18 | 36.71 |
| c6.2183722                        | 18 | 37.84 |
| c6.1621678                        | 18 | 39.83 |
| c6.553730                         | 18 | 42.03 |
| c173.1228639                      | 18 | 44.31 |
| c173.140530                       | 18 | 47.68 |

  

| Genome scan for loci with $F_{ST} > 0.58$ : |              |                                                                                                     |
|---------------------------------------------|--------------|-----------------------------------------------------------------------------------------------------|
| Marker (scaffold.Mb)                        | $F_{ST}$     | locus*                                                                                              |
| mkr6.9610135                                | 1.000        | 5', pituitary adenylate cyclase activating polypeptide receptor 1A ( <i>pacap1a</i> )               |
| mkr6.9116267                                | 0.941        | 3', KISS1 receptor a ( <i>kiss1ra</i> )                                                             |
| mkr6.7333505                                | 0.947        | intronic, interferon regulatory factor 4a ( <i>irf4a</i> )                                          |
| mkr6.6094544                                | 0.805        | 5', potassium channel tetramerisation domain containing 1 ( <i>kctd1</i> )                          |
| mkr6.4874331                                | 0.895        | 3', Sin3A-associated protein a ( <i>sap130a</i> )                                                   |
| mkr6.4465297                                | 1.000        | 5', eukaryotic translation initiation factor 2B subunit 3 gamma ( <i>eif2b3</i> )                   |
| <b>mkr6.3446185</b>                         | <b>1.000</b> | <b>5' UTR, paired box 3a (<i>pax3a</i>)</b>                                                         |
| mkr6.2501428                                | 0.900        | 3', phosphodiesterase 4D interacting protein ( <i>PDE4DIP/3</i> )                                   |
| mkr6.2421590                                | 1.000        | intronic, neurocan a ( <i>ncana</i> )                                                               |
| mkr6.2366313                                | 0.947        | intronic, neurocan a ( <i>ncana</i> )                                                               |
| mkr6.2183722                                | 1.000        | intronic, hyperpolarization activated cyclic nucleotide-gated potassium channel 2b ( <i>hcn2b</i> ) |
| mkr6.1621678                                | 0.950        | exonic, protein tyrosine phosphatase receptor type s b ( <i>ptprsb</i> )                            |
| mkr6.904096                                 | 1.000        | intronic, calsyntenin 2 ( <i>clstn2</i> )                                                           |
| mkr6.905417                                 | 0.903        | intronic, calsyntenin 2 ( <i>clstn2</i> )                                                           |
| mkr6.553730                                 | 0.857        | exonic, interferon gamma inducible protein 30 ( <i>ifi30</i> )                                      |
| mkr173.1228639                              | 1.000        | intronic, growth arrest and DNA-damage-inducible alpha a ( <i>gadd45aa</i> )                        |
| mkr173.140530                               | 1.000        | 5', zinc finger and BTB domain containing 41 ( <i>ZBTB41</i> )                                      |

\* Gene names based on homolog to zebrafish entrez genes

Table S4. Dorsal fin melanocyte-based color QTL interval on LG18

**QTL interval for R-Y flank color:**

| Marker (scaffold.Mb) | LG | cM    |
|----------------------|----|-------|
| c109.46112           | 18 | 0.00  |
| c215.432511          | 18 | 1.54  |
| c156.792769          | 18 | 2.31  |
| c215.713627          | 18 | 2.32  |
| c298.303102          | 18 | 2.51  |
| c368.126357          | 18 | 2.70  |
| c248.79966           | 18 | 2.70  |
| c291.199767          | 18 | 3.49  |
| c291.125728          | 18 | 3.49  |
| c20.loc5             | 18 | 5.00  |
| c109.2314746         | 18 | 6.75  |
| c41.248320           | 18 | 7.62  |
| c20.loc10            | 18 | 10.00 |
| c41.2756600          | 18 | 12.83 |

**Genome scan for loci with  $F_{ST} > 0.58$ :**

| Marker (scaffold.Mb)  | $F_{ST}$     | locus*                                                                                           |
|-----------------------|--------------|--------------------------------------------------------------------------------------------------|
| mkr109.1542895        | 0.950        | intronic, arylsulfatase I-like ( <i>Maylandia zebra</i> )                                        |
| mkr109.1927103        | 0.650        | intronic, Rho GTPase activating protein 12b ( <i>Maylandia zebra</i> )                           |
| mkr109.2129748        | 1.000        | 5', contactin-associated protein-like 4-like ( <i>Maylandia zebra</i> )                          |
| <b>mkr109.2314746</b> | <b>0.950</b> | <b>intronic, zinc finger E-box binding homeobox 1a (<i>zeb1a</i>)</b>                            |
| mkr156.424817         | 1.000        | intronic, myosin X ( <i>myo10</i> )                                                              |
| mkr156.525366         | 0.950        | intronic, brain abundant membrane attached signal protein 1 ( <i>basp1</i> )                     |
| mkr156.792769         | 1.000        | 5', EFR3 homolog A-like ( <i>Maylandia zebra</i> )                                               |
| mkr156.832127         | 1.000        | 5', EFR3 homolog A-like ( <i>Maylandia zebra</i> )                                               |
| mkr156.834315         | 0.814        | 5', EFR3 homolog A-like ( <i>Maylandia zebra</i> )                                               |
| mkr215.432511         | 0.947        | exonic, anion exchange protein 2-like ( <i>Maylandia zebra</i> )                                 |
| mkr215.713627         | 0.898        | 5', chromosome 7 open reading frame 25 ( <i>C2H7orf25</i> )                                      |
| mkr298.303033         | 1.000        | exonic, zinc finger protein with KRAB and SCAN domains 7-like ( <i>Maylandia zebra</i> )         |
| mkr298.303102         | 1.000        | exonic, zinc finger protein with KRAB and SCAN domains 7-like ( <i>Maylandia zebra</i> )         |
| mkr368.89586          | 0.898        | 5', SCAN domain-containing protein 2-like ( <i>sdcp2l</i> )                                      |
| mkr368.131125         | 1.000        | intronic, prohibitin-2-like ( <i>phb2l</i> )                                                     |
| mkr368.134659         | 0.717        | 5', retrotransposon Rex3a reverse transcriptase (RT) pseudogene ( <i>Xiphophorus maculatus</i> ) |
| mkr368.171494         | 1.000        | 3', retrotransposon Rex3a reverse transcriptase (RT) pseudogene ( <i>Xiphophorus maculatus</i> ) |
| mkr248.79966          | 1.000        | 5', discs large (Drosophila) homolog 1 like ( <i>dlg1l</i> )                                     |
| mkr248.366607         | 1.000        | 5', DEAH (Asp-Glu-Ala-His) box polypeptide 9 ( <i>dhx9</i> )                                     |
| mkr291.125728         | 1.000        | exonic, GTP binding protein 4 ( <i>gtpbp4</i> )                                                  |
| mkr291.199767         | 1.000        | 3', La ribonucleoprotein domain family member 4B ( <i>larp4b</i> )                               |
| mkr291.202434         | 0.606        | 3', La ribonucleoprotein domain family member 4B ( <i>larp4b</i> )                               |
| mkr291.284082         | 0.758        | 5', disco-interacting protein 2 homolog C-like ( <i>dip2c</i> )                                  |
| mkr291.363685         | 0.706        | intronic, disco-interacting protein 2 homolog C-like ( <i>dip2c</i> )                            |
| mkr41.248320          | 1.000        | 3', Rho guanine nucleotide exchange factor (GEF) 1b ( <i>arhgef1b</i> )                          |
| mkr41.248454          | 0.950        | 3', Rho guanine nucleotide exchange factor (GEF) 1b ( <i>arhgef1b</i> )                          |
| mkr41.998350          | 0.830        | 3', methyltransferase like 17 ( <i>mettl17</i> )                                                 |
| mkr41.1245393         | 0.903        | 3', GLIS family zinc finger 1a ( <i>glis1a</i> )                                                 |
| mkr41.2756600         | 1.000        | 5', protein tyrosine phosphatase, receptor type, M, a ( <i>ptprma</i> )                          |

\* Gene names based on homolog to zebrafish entrez genes (unless indicated otherwise)

Table S5. Xanthophore-based flank color QTL interval on LG14

**QTL interval for R-Y flank color:**

| Marker (scaffold.Mb) | LG | cM        |
|----------------------|----|-----------|
| c8.7656076           | 14 | 38.263786 |
| c125.302576          | 14 | 50.454291 |
| c125.1904299         | 14 | 51.205853 |
| c84.178152           | 14 | 52.039222 |
| c84.1673690          | 14 | 54.258299 |
| c84.1823503          | 14 | 54.258299 |
| c216.536016          | 14 | 55.970931 |
| c0.3426417           | 14 | 56.932689 |
| c225.417828          | 14 | 56.932689 |
| c0.2582514           | 14 | 57.313227 |
| c0.1325166           | 14 | 57.669532 |
| c0.358525            | 14 | 57.669532 |
| c84.2526567          | 14 | 58.142395 |

**Genome scan for loci with  $F_{ST} > 0.580$ :**

| Marker (scaffold.Mb) | $F_{ST}$ | locus*                                                                                     |
|----------------------|----------|--------------------------------------------------------------------------------------------|
| mkr8.6918693         | 1        | 3', Yip1 interacting factor homolog B ( <i>S. cerevisiae</i> ) ( <i>yif1b</i> )            |
| mkr8.6918698         | 0.7443   | 3', Yip1 interacting factor homolog B ( <i>S. cerevisiae</i> ) ( <i>yif1b</i> )            |
| mkr8.6918800         | 1        | 3', Yip1 interacting factor homolog B ( <i>S. cerevisiae</i> ) ( <i>yif1b</i> )            |
| mkr8.7981298         | 0.8097   | intronic, cathepsin C ( <i>ctsc</i> )                                                      |
| mkr8.8164924         | 0.8827   | 3', von Willebrand factor A domain-containing protein 5A-like ( <i>Maylandia zebra</i> )   |
| mkr125.302576        | 0.8976   | exonic, phosphatase Slingshot homolog 2-like ( <i>Maylandia zebra</i> )                    |
| mkr125.1904299       | 0.9499   | intronic, serine/threonine-protein kinase SIK3 homolog ( <i>Haplochromis burtoni</i> )     |
| mkr125.1904328       | 0.95     | intronic, serine/threonine-protein kinase SIK3 homolog ( <i>Haplochromis burtoni</i> )     |
| mkr84.178152         | 0.6248   | intronic, D4 zinc and double PHD fingers family 1 ( <i>dpf1</i> )                          |
| mkr84.414096         | 1        | 3', glioma tumor suppressor candidate region gene 2 ( <i>gltscr2</i> )                     |
| mkr84.541826         | 0.95     | intronic, ATPase aminophospholipid transporter class I type 8B member 1 ( <i>atp8b1</i> )  |
| mkr84.814645         | 0.9236   | 5', 28S ribosomal protein S22, mitochondrial-like ( <i>Maylandia zebra</i> )               |
| mkr84.1255367        | 0.8503   | 3', calyntenin 2 ( <i>clstn2</i> )                                                         |
| <b>mkr84.1673690</b> | <b>1</b> | <b>3', ephrin type-A receptor 4 (<i>epha4a</i>)</b>                                        |
| <b>mkr84.1823503</b> | <b>1</b> | <b>3', paired box 3b (<i>pax3b</i>)</b>                                                    |
| mkr84.2400244        | 0.7956   | intronic, chloride channel voltage-sensitive 2 ( <i>CLCN2</i> )                            |
| mkr84.2526567        | 1        | 3' chordin ( <i>chd</i> )                                                                  |
| mkr216.536016        | 1        | 5', vascular endothelial zinc finger 1b ( <i>vezf1b</i> )                                  |
| mkr225.417828        | 0.5944   | intronic, seizure related 6 homolog b ( <i>sez6b</i> )                                     |
| mkr225.600890        | 0.95     | 5', PHD finger protein 12a ( <i>phf12a</i> )                                               |
| mkr0.358525          | 0.8573   | 5', pleckstrin homology-like domain family B member 1b ( <i>phldb1b</i> )                  |
| mkr0.1325166         | 1        | 3', sortilin-related receptor L(DLR class) A repeats containing ( <i>sor1</i> )            |
| mkr0.1325183         | 1        | 3', sortilin-related receptor L(DLR class) A repeats containing ( <i>sor1</i> )            |
| mkr0.2582514         | 0.9472   | intronic, breast carcinoma amplified sequence 3 ( <i>bcas3</i> )                           |
| mkr0.2639114         | 1        | intronic, breast carcinoma amplified sequence 3 ( <i>bcas3</i> )                           |
| mkr0.3426417         | 1        | 5', bone morphogenetic protein/retinoic acid inducible neural-specific 1 ( <i>BRINP1</i> ) |

\* Gene names based on homolog to zebrafish entrez genes (unless indicated otherwise)
